# Supplementary material
Source: publisher figshare collection journal article supplement (https://gsapubs.figshare.com/articles/dataset/_/22666636)

Zhu, Y., Lai, S.-c., Xie, W.-l., Qin, J.-f., Zhu, R.-z., Zhao, S.-w., Liu, M., Zhang, F.-y., Zhang, Z.-z., and Yang, H., 2023, Wet calc-alkaline magmatic fractionation in the middle–upper crustal sections of continental arc: Insights from Neoproterozoic Nanba intrusive complex, western Yangtze Block, South China: GSA Bulletin, <https://doi.org/10.1130/B36786.1>.

## Supplemental Material

**Figure S1** Field outcrops for the Nanba intrusive complex along the western Yangtze Block, South China. (See text for detailed descriptions)

**Figure S2** Cathodoluminescence (CL) images of representative zircons of the different lithologies in the Neoproterozoic Nanba intrusive complex of the western Yangtze Block, South China.

**Figure S3** Laser ablation-inductively coupled plasma-mass spectrometry (LA-ICP-MS) zircon U-Pb concordia diagrams for the different lithologies in the Neoproterozoic Nanba intrusive complex of the western Yangtze Block, South China.

**Figure S4** Photomicrographs show the polycrystalline aggregate of feldspar phases in the K-feldspar granites in Neoproterozoic Nanba intrusive complex of the western Yangtze Block, South China. Pl—plagioclase; Kfs—K-feldspar.

**Supplemental Data S1** A summary of Neoproterozoic igneous rocks of the western Yangtze Block, South China

**Supplemental Data S2** Representative electron probe analyses of feldspar from the Neoproterozoic Nanba intrusive complex of the western Yangtze Block, South China

**Supplemental Data S3** Representative electron probe analyses of hornblende from the Neoproterozoic Nanba intrusive complex of the western Yangtze Block, South China

**Supplemental Data S4** LA-ICP-MS zircon U-Pb dating results for the Neoproterozoic Nanba intrusive complex of the western Yangtze Block, South China

**Supplemental Data S5** Zircon Lu-Hf isotopic data of the Neoproterozoic Nanba intrusive complex of the western Yangtze Block, South China

**Supplemental Data S6** The whole-rock major (wt.%) and trace (ppm) elements for the Neoproterozoic Nanba intrusive complex of the western Yangtze Block, South China



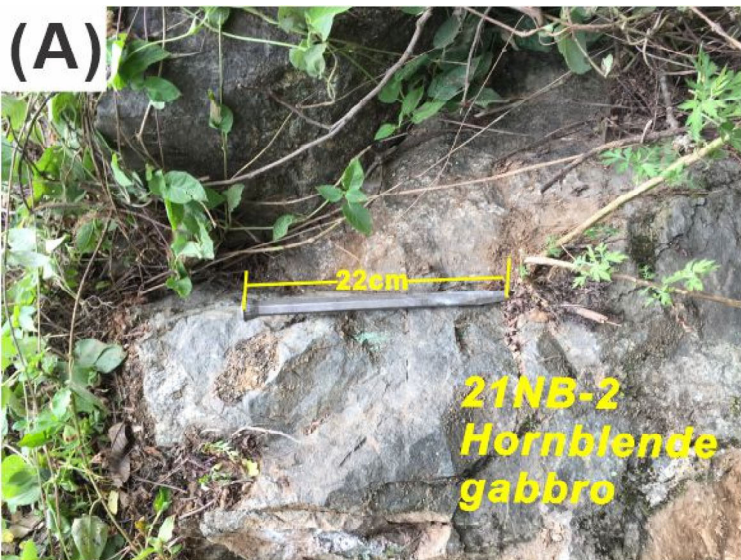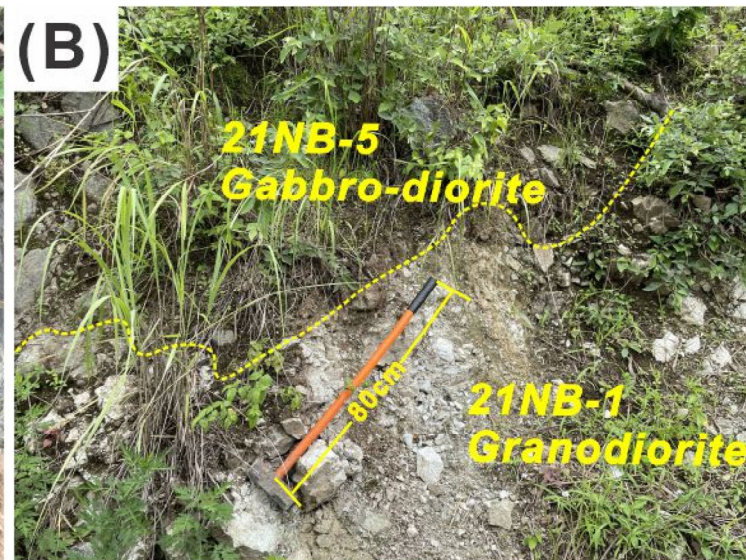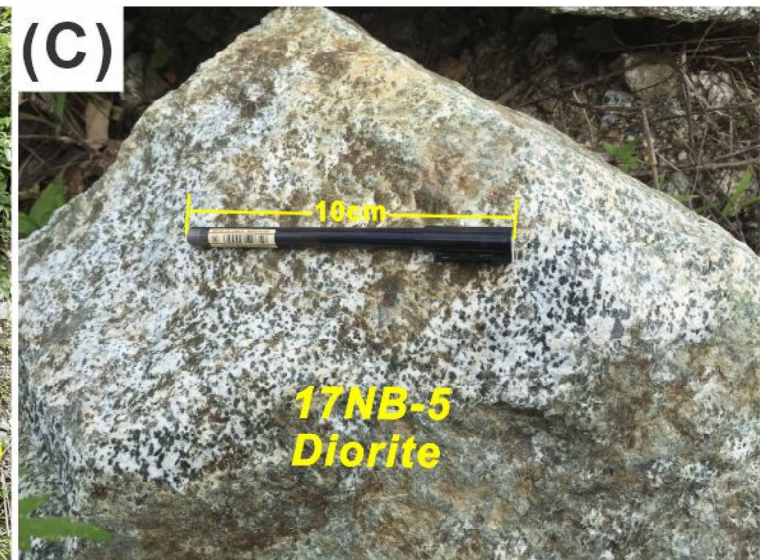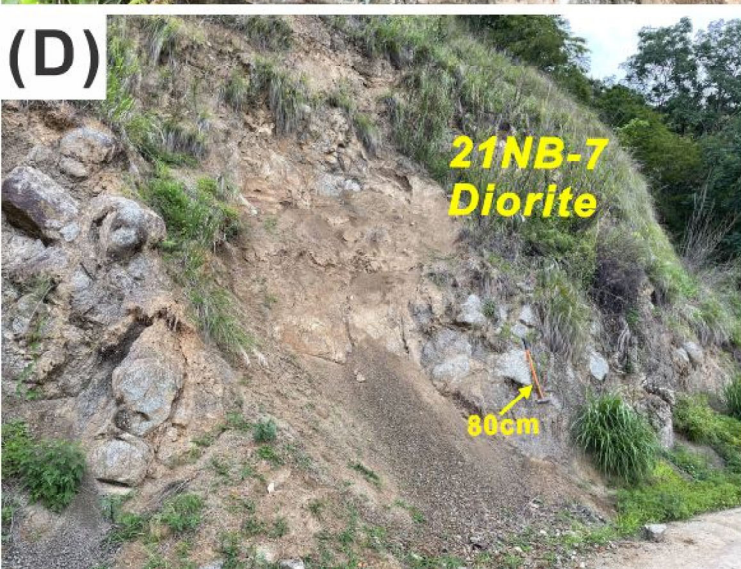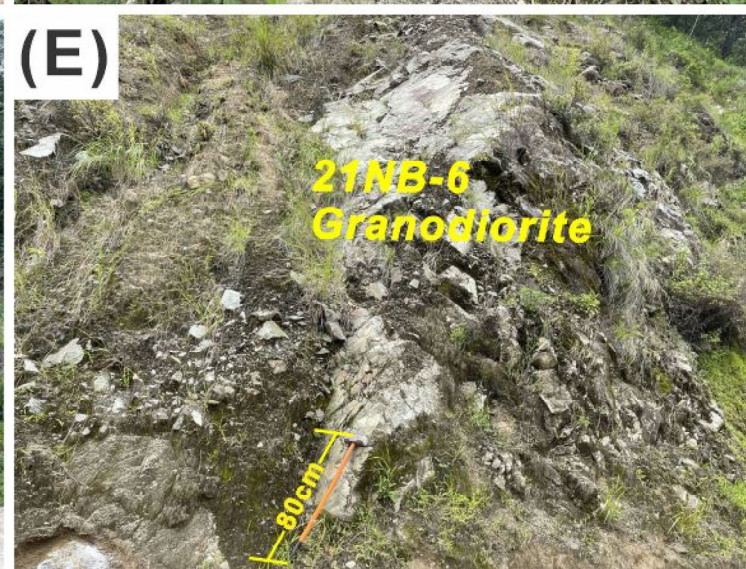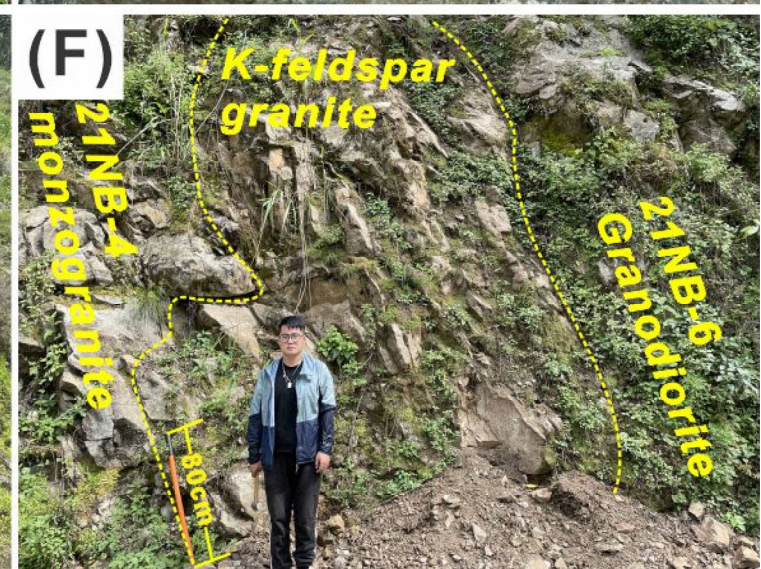



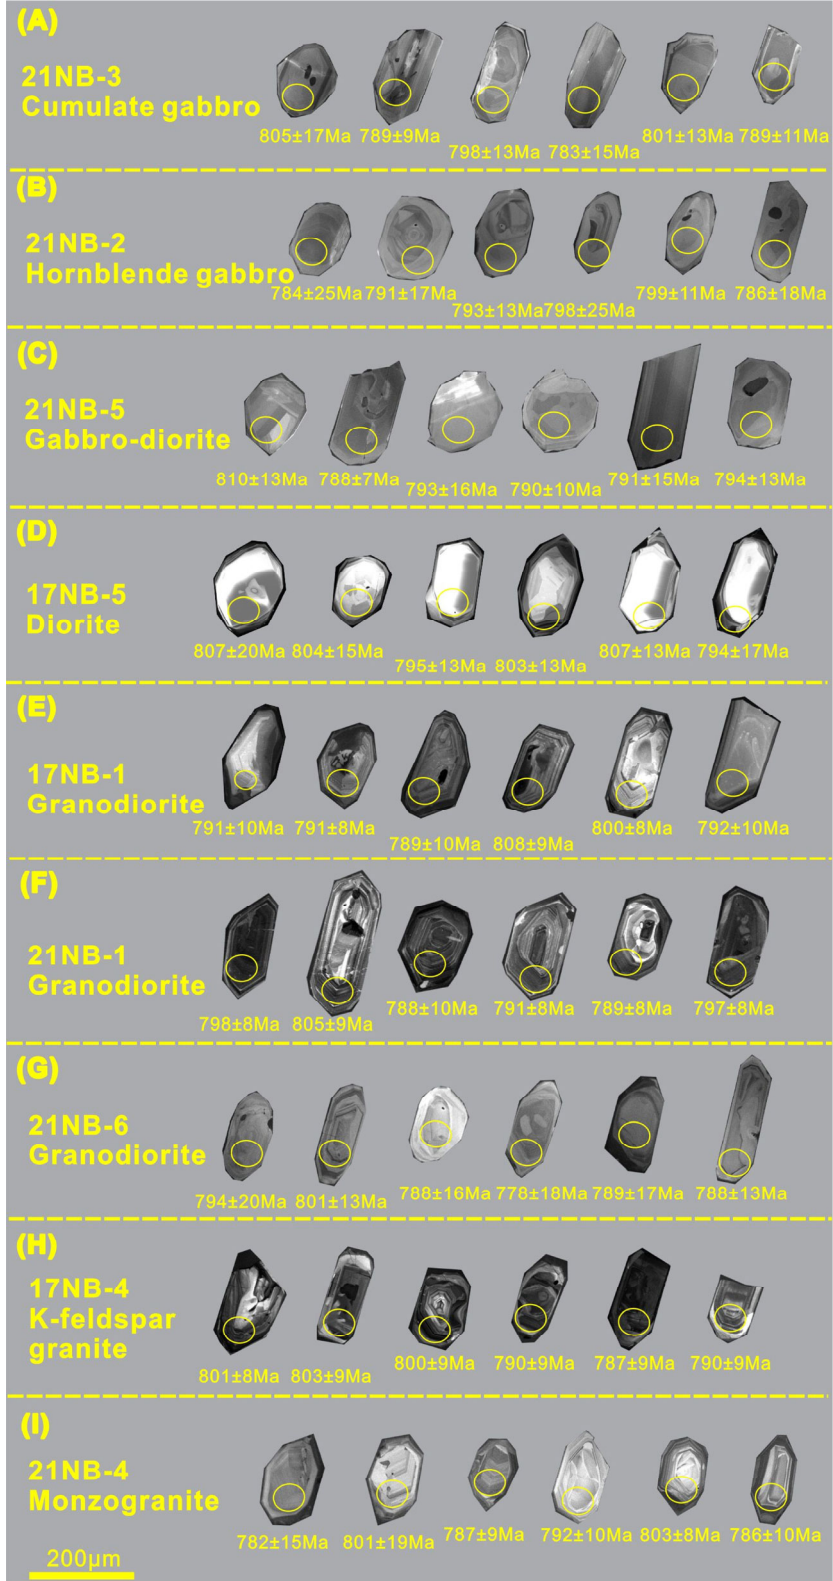

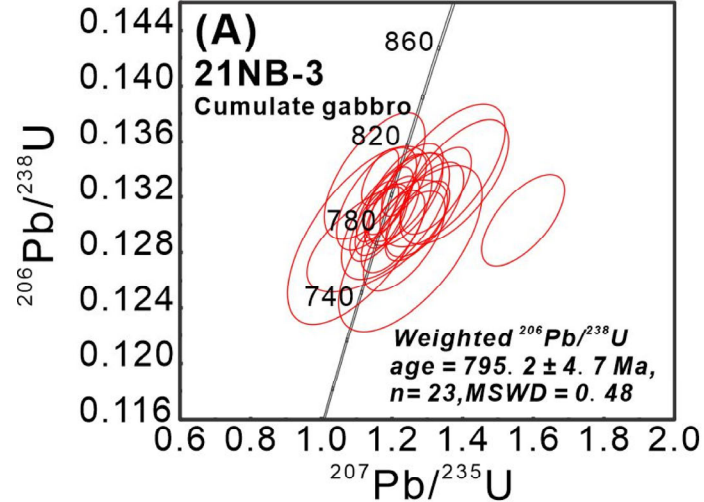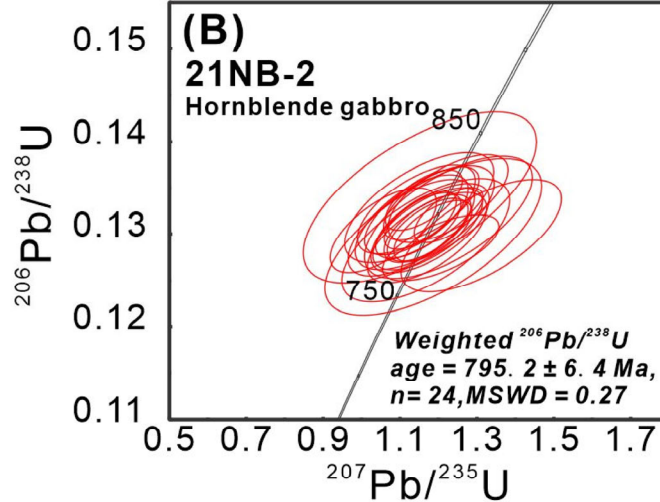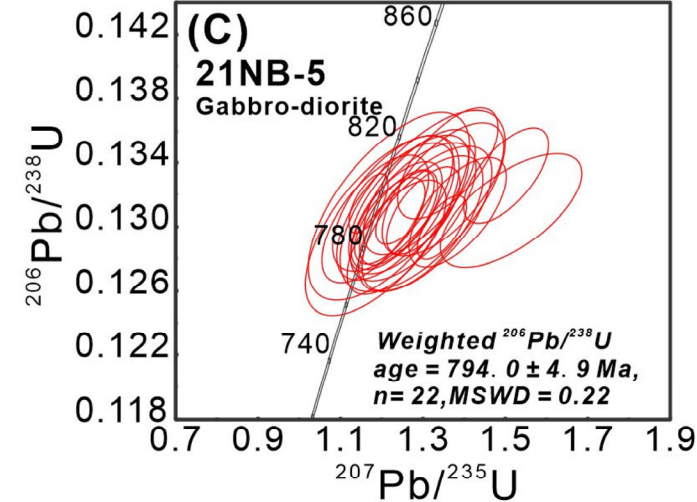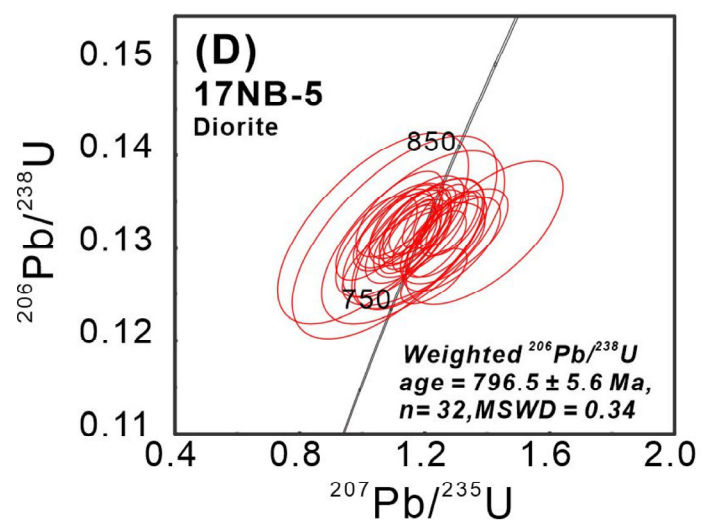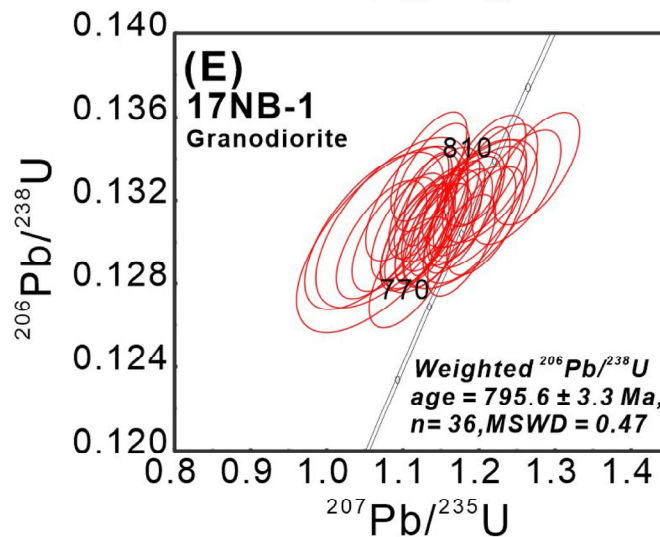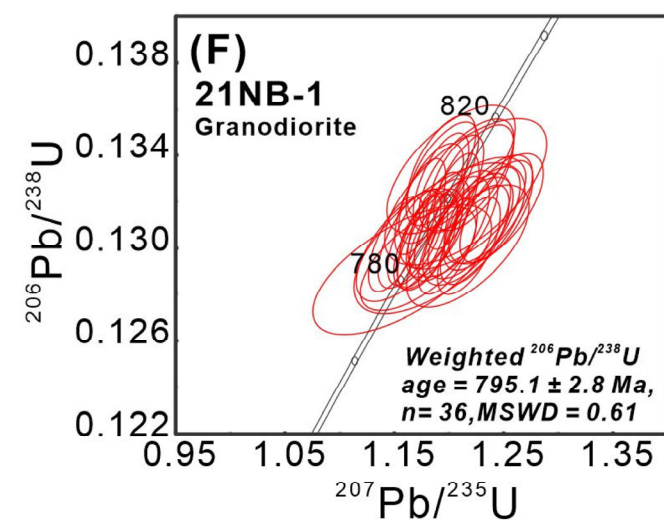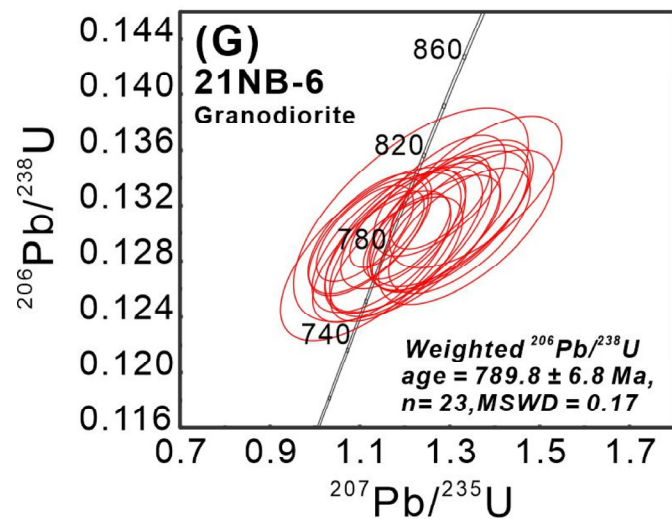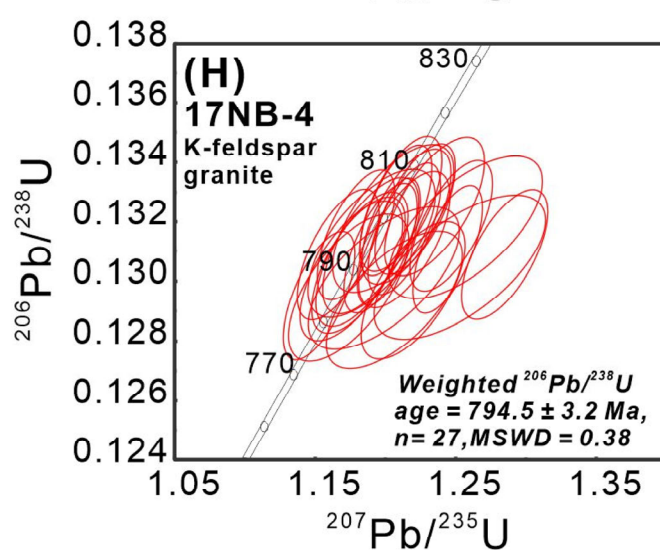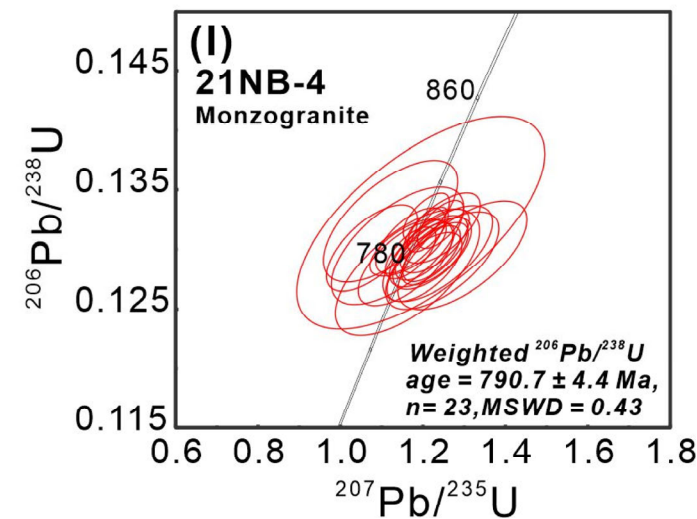



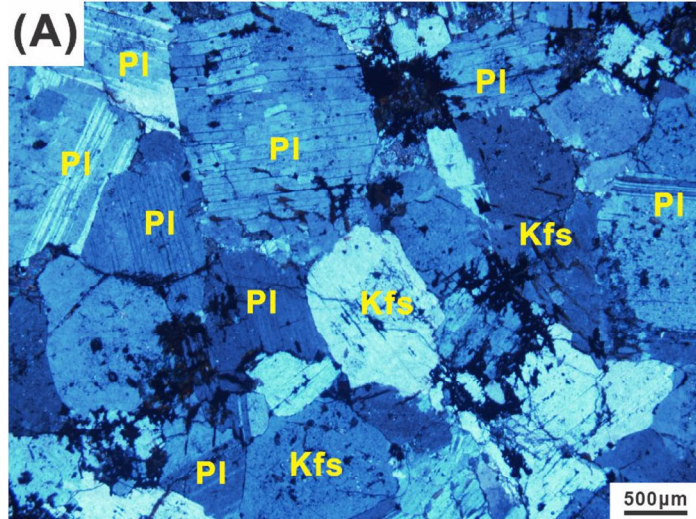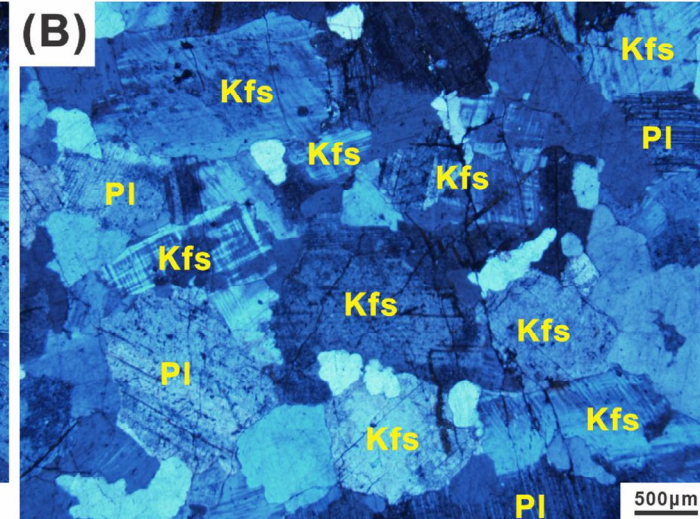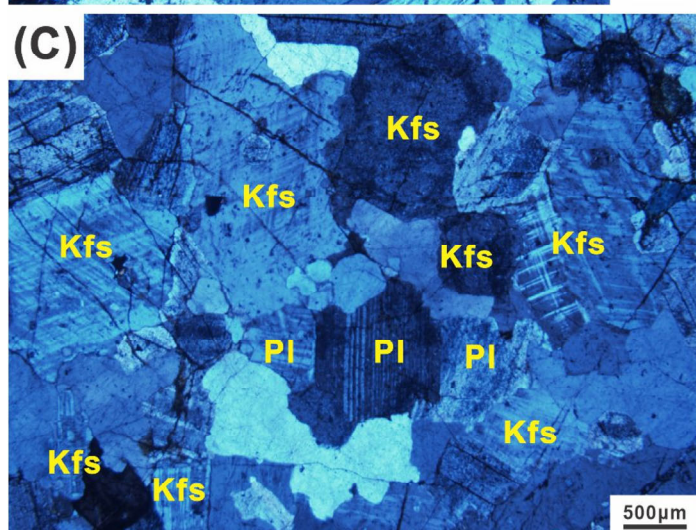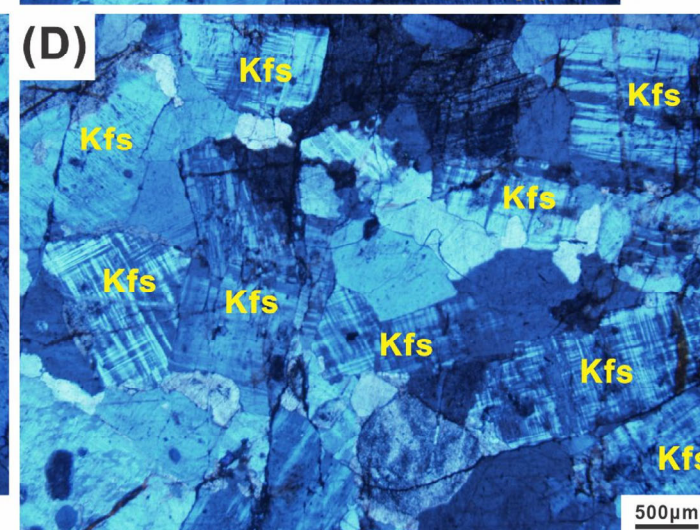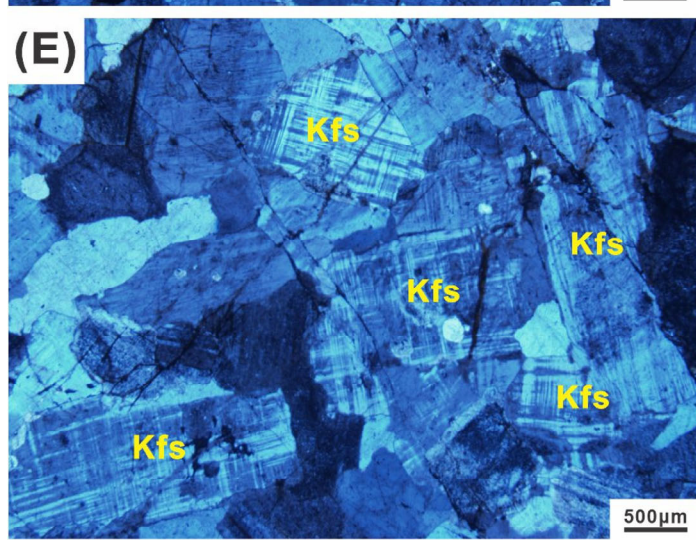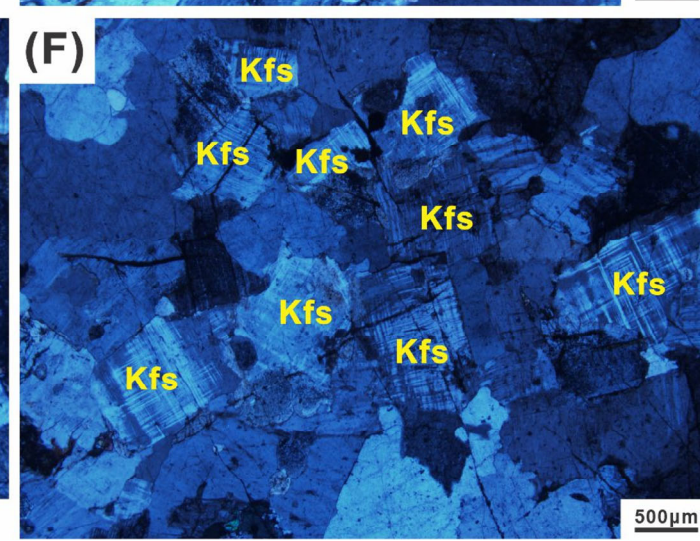

Supplement: Supplementary file 1 [file 2]
