# Supplementary material
Source: publisher figshare collection journal article supplement (https://gsapubs.figshare.com/articles/dataset/_/22666636)
Supplement: Supplementary file 1 [file 2]

## Sheet: Neoproterozoic igneous rocks
Supplementary Data S1 A summary of Neoproterozoic igneous rocks of the western Yangtze Block, South China
Number	Location	Lithology	Sample name	Zircon U-Pb age (Ma)	References
Kangding-Mianning region
1	Moutuo	Granodiorite-granite	NX12	804	Qi and Zhao, 2020
2	Moutuo	Granodiorite-granite	NX13	802	Qi and Zhao, 2020
3	Jiangziding	Granitoid	15QX-1-1	796	Li et al., 2018
4	Jiangziding	Granitoid	15QX-1-2	793	Li et al., 2018
5	Jiangziding	Granitoid	15QX-13-1	795	Li et al., 2018
6	Jiangziding	Basaltic porphyry	15QX-3-1	790	Li et al., 2018
7	Tianquan	Granodiorite-granite	JJP-02	851	Lai et al., 2015b
8	Gongcai	Gneissic granite	Gc1	824	Zhou et al., 2002
9	Gezong	Gneissic granite	Gz7	864	Zhou et al., 2002
10	Baoxing	Gabbro	SC02-1	848	Meng et al., 2015
11	Baoxing	Gabbro-diorite	SC01-4	799	Meng et al., 2015
12	Baoxing	Gabbro-diorite	SC09-3	802	Meng et al., 2015
13	Baoxing	Granite	SC07-2	773	Meng et al., 2015
14	Baoxing	Granite	SC08-1	769	Meng et al., 2015
15	Baoxing	Gabbro	HSH5	870	Zhao et al., 2019
16	Baoxing	Gabbro	HSH21	872	Zhao et al., 2019
17	Daxiangling	Granite (A-type)	KD06-57	816	Zhao et al., 2008b
18	Shimian	Granite (I-type)	KD06-32	797	Zhao et al., 2008b
19	Shimian	Granite (I-type)	KD06-184	790	Zhao et al., 2008b
20	Shimian	Granite	SM25	808	Zhao et al., 2021
21	Shimian	Granite	SM22	807	Zhao et al., 2021
22	Shimian ophiolite	Gabbro	SM137	792	Zhao et al., 2017
23	Shimian ophiolite	Gabbro	SM140	796	Zhao et al., 2017
24	Shimian ophiolite	Gabbro	SM48	806	Zhao et al., 2017
25	Shimian ophiolite	Mafic dike	SM18	811	Zhao et al., 2017
26	Shimian ophiolite	Gabbro	SMT6	937	Hu et al., 2017
27	Shimian	Diabase	SMT4	837	Hu et al., 2020
28	Shimian	Rhyolite	17S027	839	Hu et al., 2020
29	Shimian	Rhyolite	16S019	836	Hu et al., 2020
30	Shimian(Anshunchang)	K-feldspar granites	WJ-18	777	Zhu et al., 2017
31	Shimian	Granite	04KD23-1	818	Lin, 2010
32	Kangding	Gneissic granite	Kd2	797	Zhou et al., 2002
33	Kangding	Gneissic granite	Kd11	795	Zhou et al., 2002
34	Kangding	Kangding	Kd35	796	Zhou et al., 2002
35	Kangding	Mafic dike	04KD4-1	779	Lin et al., 2007
36	Kangding	Mafic dike	04KD16-4	758	Lin et al., 2007
37	Kangding	Granodiorite	YT-14	748	Lai et al., 2015a
38	Kangding	Monzogranite	KD-18	791	Liu et al., 2009
39	Luding	Quartz monzodiorite	LD-12	754	Lai et al., 2015a
40	Suxiong	Rhyolite	98KD76	803	Li et al., 2002
41	Suxiong	Rhyolite	DYF-1	819	Zou et al., 2021
42	Suxiong	Rhyolite	DYF-2	813	Zou et al., 2021
43	Suxiong	Rhyolite	YCG-1	810	Zou et al., 2021
44	Suxiong	Rhyolite	YCG-3	818	Zou et al., 2021
45	Shimian	Granite	YCG-10	786	Zou et al., 2021
46	Shimian	Granite	YCG-11	787	Zou et al., 2021
47	Dengganping	Biotite granite	Y0407	743	Zou et al., 2020
48	Dengganping	Biotite granite	Y0408	742	Zou et al., 2020
49	Dengganping	Syenogranite	Y0412	811	Zou et al., 2020
50	Dengganping	Syenogranite	Y0414	815	Zou et al., 2020
51	Xuelongbao	TTG	XLB4	751	Zhao et al., 2021
52	Xuelongbao	Tonalite+granodiorite	XL-20	748	Zhou et al., 2006b
53	Mianning (Daqiao)	Granite (A-Type)	DQ05-5	775	Huang et al., 2008
54	Mianning (Xinpuzi)	Granite (A-Type)	XPZ05-6	773	Huang et al., 2008
Xichang-Miyi region
55	Xiacun	Mafic rock	XC-1	842	Guo et al., 2007
56	Xiacun	Granite	XC-2	803	Guo et al., 2007
57	Yonglang	Granite	YL-6	790	Guo et al., 2007
58	Miyi	Gneissic granite	Meta-7	764	Zhou et al., 2002
59	Mosuoying	Granite	D3202	838	Mabi et al., 2018
60	Dengxiangying	Mafic rock		810	Li and Zhao, 2018b
61	Dengxiangying/Xide	Mafic dike	12XD-D1	809	Cui et al., 2015
62	Dengxiangying/Xide	Mafic dike	13XD-D12	808	Cui et al., 2015
63	Dengxiangying/Xide	Mafic dike	12XD-D4	809	Cui et al., 2015
64	Dengxiangying/Xide	Mafic dike	13XD-D13	796	Cui et al., 2015
65	Dengxiangying/Xide	Mafic dike	12XD-D9	824	Cui et al., 2015
66	Lugu	Granite (A-type)	PM47H1	806	Yan et al., 2017
67	Lugu	Granite (A-type)	PM68H1	817	Yan et al., 2017
68	Yonglang	Granodiorite	YL-9	852	Zhu et al., 2021a
69	Yonglang	Biotite granite	YL-7	845	Zhu et al., 2021a
70	Yonglang	Monzogranite	YL-3	840	Zhu et al., 2021a
71	Yonglang	Biotite granite	YL-2	834	Zhu et al., 2021a
72	Yonglang	Granodiorite	YL-1	826	Zhu et al., 2021a
73	Kuangyu	Biotite granite	KY-2	840	Zhu et al., 2019b
74	Cida	Biotite granite	CD-1	835	Zhu et al., 2019b
75	Cida	Biotite granite	CD-2	835	Zhu et al., 2019b
76	Mopanshan	Granodiorite	MPS-5	819	Zhu et al., 2022
77	Mopanshan	Monzogranite	MPS-3	820	Zhu et al., 2022
78	Mopanshan	Monzogranite	MPS-2	819	Zhu et al., 2022
79	Mopanshan	Tonalite+granodiorite	MPS05-3	782	Huang et al., 2009
80	Mopanshan	TTG	MPS1	785	Zhao et al., 2021
81	Mopanshan	TTG	MPS2	781	Zhao et al., 2021
82	Yele	Diorite	KD30	732	Zhao et al., 2021
83	Yele	Diorite	KD33	736	Zhao et al., 2021
84	Shaba	Gabbro	SB02	788	Zhao et al., 2019
85	Shaba	Gabbro	SB31	787	Zhao et al., 2019
86	Shaba	Gabbro		748	Zhao et al., 2008a
Yanbian-Panzhihua region
87	Guandaoshan	Granodiorite	99KD45	857	Li et al., 2003
88	Guandaoshan	Quartz diorite	CX413-1	857	Du et al., 2014
89	Guandaoshan	Gabbroic diorite	CX485-1	856	Du et al., 2014
90	Guandaoshan	Gabbro	CX486-4	856	Du et al., 2014
91	Guandaoshan	Diorite	G25	858	Sun and Zhou, 2008
92	Guandaoshan	Gabbro-diorite	GDS-10	856	Zhu et al., 2020b
93	Ganyuhe	Hornblende gabbro	GYH-1	857	Zhu et al., 2020b
94	Fangtian	Basaltic lava		840	Sun et al., 2007
95	Tongde	Diorite	GJ2387	825	Munteanu et al., 2010
96	Tongde	Diorite	TDM10	830	Li and Zhao, 2018a
97	Tongde	Gabbro	TD02	856	Zhao et al., 2019
98	Tongde	Gabbro	TD19	852	Zhao et al., 2019
99	Lengshuiqing	Gabbro	LSQ23	837	Zhao et al., 2019
100	Lengshuiqing	Diorite	PZH34	812	Zhou et al., 2006a
101	Gaojiacun	Diorite	PZH51	806	Zhou et al., 2006a
102	Gaojiacun	Gabbro	GJC2	852	Zhao et al., 2019
103	Gaojiacun	Gabbro	GJC4	843	Zhao et al., 2019
104	Gaojiacun	Hornblende gabbro	GJD7	825	Zhu et al., 2006
105	Dajianshan	Gabbro-diorite	DJS-1	810	Zhu et al., 2019c
106	Dajianshan	Biotite granite (adakite)	DJS-2	800	Zhu et al., 2019c
107	Yanbian	Hornblende gabbro	HT-01	792	Zhu et al., 2008
108	Yanbian	Gabbro+Dolerite	04HS-01	761	Zhu et al., 2008
109	Datian	Dolerite	DT1204	794	Yang et al., 2016
110	Datian	Dolerite	DT1201	760	Yang et al., 2016
111	Datian	TTG	DT10	800	Zhao et al., 2021
112	Datian	TTG	DT16	801	Zhao et al., 2021
113	Dalu	Granodiorite (I-type)	DL-2	781	Zhu et al., 2019a
114	Dalu	Granite (I-type)	DL-4	780	Zhu et al., 2019a
115	Shuilu	Diorite	SL-3	850	Zhu et al., 2020a
116	Shuilu	Diorite	SL-5	841	Zhu et al., 2020a
117	Shuilu	Diorite	SL-1	837	Zhu et al., 2020a
118	Datian	Granodiorite	DT-29	760	Zhao and Zhou, 2007b
119	Dajianshan	TTG	DJS11	797	Zhao et al., 2021
120	Dajianshan	TTG	DJS12	802	Zhao et al., 2021
121	Dadukou	Olivine gabbro	PZH77	746	Zhao and Zhou, 2007a
122	Dadukou	Hornblende gabbro	PZH7420	738	Zhao and Zhou, 2007a
123	Dadukou	Gabbro	DDK26	814	Zhao et al., 2019
124	Dadukou	Gabbro	DDK46	823	Zhao et al., 2019
125	Panzhihua	K-feldspar ranite (A-type)	PZH-09	750	Zhu et al., 2019c
126	Gonghe	Granite	GH-01	925	Zhang et al., 2020a
127	Mojiawan	Monzogranite	MJW-12	797	Jiang et al., 2020
128	Mojiawan	Monzogranite	MJW-13	785	Jiang et al., 2020
129	Guaziping	Granite	GZP-10	781	Zou et al., 2021
130	Guaziping	Granite	GZP-3	783	Zou et al., 2021
131	Heime	Granite	DT17-22-1	822	Zhang et al., 2020b
132	Heime	Granite	DT18-68-1	822	Zhang et al., 2020b
TTG-tonalite–trondhjemite–granodiorite
Reference:
Cui, X.Z., Jiang, X.S., Wang, J., Wang, X.C., Zhuo, J.W., Deng, Q., Liao, S.Y., Wu, H., Jiang, Z.F., Wei, Y.A., 2015. Mid-Neoproterozoic diabase dykes from Xide in the western Yangtze Block, South China: new evidence for continental rifting related to the breakup of Rodinia supercontinent. Precambrian Research 268, 339–356.
Du, L.L., Guo, J.H., Nutman, A.P., Wyman, D., Geng, Y.S., Yang, C.H., Liu, F.L., Ren, L.D., Zhou, X.W., 2014. Implications for Rodinia reconstructions for the initiation of Neoproterozoic subduction at ~860 Ma on the western margin of the Yangtze Block: evidence from the Guandaoshan Pluton. Lithos 196–197, 67–82.
Guo, C.L., Wang, D.H., Chen, Y.C., Zhao, Z.G., Wang Y.B., Fu X.F., Fu, D.M., 2007, SHRIMP U-Pb zircon ages and major element, trace element and Nd-Sr isotope geochemical studies of a Neoproterozoic granitic complex in western Sichuan: petrogenesis and tectonic significance. Acta Petrologica Sinica 23(10), 2457–2470 (in Chinese with English abstract).
Hu, P.Y., Zhai, Q.G., Wang, J., Tang, Y., Ren, G.M., 2017. The Shimian ophiolite in the western Yangtze Block, SW China: Zircon SHRIMP U-Pb ages, geochemical and Hf-O isotopic characteristics, and tectonic implications. Precambrian Research 298, 107–122.
Hu, P.Y., Zhai, Q.G., Wang, J., Tang, Y., Ren, G.M., Zhu, Z.C., Wang, W., Wu, H., 2020. U-Pb zircon geochronology, geochemistry, and Sr-Nd-Hf-O isotopic study of Middle Neoproterozoic magmatic rocks in the Kangdian Rift, South China: Slab rollback and backarc extension at the northwestern edge of the Rodinia. Precambrian Research 347, 105863.
Huang, X.L., Xu, Y.G., Li, X.H., Li, W.X., Lan, J.B., Zhang, H.H., Liu, Y.S., Wang, Y.B., Li, H.Y., Luo. Z.Y., Yang, Q.J., 2008. Petrogenesis and tectonic implications of Neoproterozoic, highly fractionated A-type granites from Mianning, South China. Precambrian Research 165 (3–4), 190–204.
Huang, X.L., Xu, Y.G., Lan, J.B., Yang, Q.J., Luo, Z.Y., 2009. Neoproterozoic adakitic rocks from Mopanshan in the Western Yangtze craton: partial melts of a thickened lower crust. Lithos 112(3), 367–381.
Jiang, X.W., Zou, H., Bagas, L., Chen, H.F., Liu, H., Li, Y., Li, M., Li, D., 2020. The Mojiawan I-type granite of the Kangding Complex in the western Yangtze Block: New constraint on the Neoproterozoic magmatism and tectonic evolution of South China. International Geology Review, https://doi.org/10.1080/00206814.2020.1833254
Lai, S.C., Qin, J.F., Zhu, R.Z., Zhao, S.W., 2015a. Neoproterozoic quartz monzodiorite–granodiorite association from the Luding–Kangding area: implications for the interpretation of an active continental margin along the Yangtze Block (South China Block). Precambrian Research 267(3–4), 196–208.
Lai, S.C., Qin, J.F., Zhu, R.Z., Zhao, S.W., 2015b, Petrogenesis and tectonic implication of Neoproterozoic peraluminous granitoids from the Tianquan area, western Yangtze Block, South China. Acta Petrologica Sinica 31(8), 2245–2258 (in Chinese with English abstract).
Li, J.Y., Wang, X.L., Gu, Z.D., 2018. Petrogenesis of the Jiaoziding granitoids and associated basaltic porphyries: Implications for extensive early Neoproterozoic arc magmatismin western Yangtze Block. Lithos 296–299, 547–562.
Li, Q.W., and Zhao, J.H., 2018a, The Neoproterozoic high-Mg dioritic dikes in South China formed by high pressures fractional crystallization of hydrous basaltic melts. Precambrian Research 309, 198–211.
Li, Q.W., and Zhao, J.H., 2018b. Nature and Thermal State of the Lithosphere beneath the Western Margin of the Yangtze Block in South China during the Neoproterozoic. The Journal of Geology. DOI: 10.1086/697306
Li, X.H., Li, Z.X., Zhou, H.W., Liu, Y., Kinny, P.D., 2002. U-Pb zircon geochronology, geochemistry and Nd isotopic study of Neoproterozoic bimodal volcanic rocks in the Kangdian Rift of South China: Implications for initial rifting of Rodinia. Precambrian Research 113, 135–154.
Li, X.H., Li, Z.X., Zhou, H.W., Liu, Y., Liang, X.R., Li, W.X., 2003. SHRIMP U-Pb zircon age, geochemistry and Nd isotope of the Guandaoshan pluton in SW Sichuan: petrogenesis and tectonic significance. Science in China (Series D) 46(1), 73–83.
Lin, G. C., Li, X.H., Li, W.X., 2007. SHRIMP U-Pb zircon age, geochemistry and Nd-Hf isotope of Neoproterozoic mafic dyke swarms in western Sichuan: Petrogenesis and tectonic significance. Science in China Series D: Earth Sciences. 50 (1), 1-16.
Lin, G.C., 2010. Zircon U-Pb age and petrochemical characteristics of Shimian granite in western Sichuan: Petrogenesis and tectonic significance. Earth Science-Journal of China University of Geosciences, 35 (4) , 611–620.
Liu, S.W., Yan, Q.R., Li, Q.G., Wang, Z.Q., 2009. Petrogenesis of granitoid rocks in the Kangding Complex, western margin of the Yangtze Craton and its tectonic significance. Acta Petrologica Sinica 25 (8): 1883-1896.
Mabi, A.W., Yang, Z.X., Zhang, M.C., Wen, D.K., Li, Y.L., Liu, X.Y., 2018. Two types of granites in the western Yangtze block and their implications for regional tectonic evolution: constraints from geochemistry and isotopic data. Acta Geologica Sinica - English Edition 92(1), 89–105.
Meng, E., Liu, F.L., Du, L.L., Liu, P.H., Liu, J. H., 2015. Petrogenesis and tectonic significance of the Baoxing granitic and mafic intrusions, southwestern china: evidence from zircon U–Pb dating and Lu–Hf isotopes, and whole-rock geochemistry. Gondwana Research 28(2), 800–815.
Munteanu, M., Wilson, A., Yao, Y., Harris, C., Chunnett, G., Luo, Y., 2010. The Tongde dioritic pluton (Sichuan, SW China) and its geotectonic setting: regional implications of a local-scale study. Gondwana Research 18(2), 455–465.
Qi, H., Zhao, J.H., 2020. Petrogenesis of the Neoproterozoic low-δ18O granitoids at the western margin of the Yangtze block in South China. Precambrian Research 351, 105953.
Sun, W.H., Zhou, M.F., Zhao, J.H., 2007. Geochemistry and Tectonic Significance of Basaltic Lavas in the Neoproterozoic Yanbian Group, Southern Sichuan Province, Southwest China. International Geology Review 49 (6), 554–571.
Sun, W.H., Zhou, M.F., 2008. The ~860 Ma, Cordilleran-type Guandaoshan dioritic pluton in the Yangtze Block, SW China: implications for the origin of Neoproterozoic magmatism. Journal of Geology 116(3), 238–253.
Yan, S.W., Bai, X.Z., Wu, W.X., Zhu, B., Zhan, Q.Y., Wen, L., Yang, H., Wang, Y.T., 2017. Genesis and geological implications of the Neoproterozoic A-type granite from the Lugu area, western Yangtze Block. Geology in China 44 (1), 136-150.
Yang, Y.J., Zhu, W.G., Bai, Z., Zhong, H., Ye, X.T., Fan, H.P., 2016. Petrogenesis and tectonic implications of the Neoproterozoic Datian mafic–ultramafic dykes in the Panzhihua area, western Yangtze block, SW China. International Journal of Earth Sciences 106(1), 1–29.
Zhang, J.B., Ding, X.Z., Liu, Y.X., 2020. Neoproterozoic tectonic switch on the southwestern Yangtze Block: evidence from zircon U-Pb-Hf isotopes and geochemistry of the A- and I-type granites. International Geology Review, https://doi.org/10.1080/00206814.2020.1836681
Zhang, Y.S., Wu, Y., Pan, J.Y., Wang, F.G., Yao, J., Han, W.W., Zhong, F.J., 2020. Petrogenesis and tectonic significances of the Heimo granitic pluton in the western margin of Yangtze Plate: Constraints from SIMS zircon U-Pb geochronology and petrogeochemistry. Bulletin of Mineralogy, Petrology and Geochemistry. https://doi.org/10.19658/j.issn.1007-2802.2020.39.056
Zhao, J.H., and Zhou, M.F., 2007a. Geochemistry of Neoproterozoic mafic intrusions in the Panzhihua district (Sichuan Province, SW China): Implications for subduction-related metasomatism in the upper mantle. Precambrian Research 152(1), 27–47.
Zhao, J.H., and Zhou, M.F., 2007b. Neoproterozoic Adakitic Plutons and Arc Magmatism along the western Margin of the Yangtze Block, South China. Journal of Geology 115(6), 675–689.
Zhao, J.H., Zhou, M.F., Yan, D.P., Yang, Y.H., Sun, M., 2008a. Zircon Lu–Hf isotopic constraints on Neoproterozoic subduction-related crustal growth along the western margin of the Yangtze Block, South China. Precambrian Research 163 (3), 189–209.
Zhao, J.H., Asimow, P.D., Zhou, M.F., Zhang, J., Yan, D.P., Zheng, J.P., 2017. An Andean-type arc system in Rodinia constrained by the Neoproterozoic Shimian ophiolite in South China. Precambrian Research 296, 93–111.
Zhao, J.H., Zhou, M.F., Wu, Y.B., Zheng, J.P., Wang, W., 2019. Coupled evolution of Neoproterozoic arc mafic magmatism and mantle wedge in the western margin of the South China Craton. Contributions to Mineralogy and Petrology 174: 36.
Zhao, J.H., Nebel, O., Johnson, T.E., 2021. Formation and evolution of a Neoproterozoic continental magmatic arc. Journal of Petrology 62(8), 1–53.
Zhao, X.F., Zhou, M.F., Li, J.W., Wu, F.Y., 2008b. Association of Neoproterozoic A- and I-type granites in south china: implications for generation of A-type granites in a subduction-related environment. Chemical Geology 257(s1), 1–15.
Zhou, M.F., Yan, D., Kennedy, A.K., Li, Y.Q., Ding, J., 2002. SHRIMP U–Pb zircon geochronological and geochemical evidence for Neoproterozoic arc-magmatism along the western margin of the Yangtze Block, South China. Earth and Planetary Science Letters 196(1–2), 51–67.
Zhou, M.F., Ma, Y.X., Yan, D.P., Xia, X.P., Zhao, J.H., Sun, M., 2006a. The Yanbian Terrane (Southern Sichuan Province, SW China): A Neoproterozoic arc assemblage in the western margin of the Yangtze Block. Precambrian Research 144(1–2), 19–38.
Zhou, M.F., Yan, D.P., Wang, C.L., Qi, L., Kennedy, A., 2006b. Subduction-related origin of the 750 Ma Xuelongbao adakitic complex (Sichuan Province, China): Implications for the tectonic setting of the giant Neoproterozoic magmatic event in South China. Earth and Planetary Science Letters 248(1–2), 286–300.
Zhu, W.G., Zhong, H., Deng, H.L., Wilson, A.H., Liu, B.G., Li, C.Y., Qin, Y., 2006. SHRIMP zirocn U-Pb age, geochemistry, and Nd-Sr isotopes of the Gaojiacun mafic-ultramafic intrusive complex, Southwest China. International Geology Review https://doi.org/10.2747/0020-6814.48.7.650.
Zhu, W.G., Zhong, H., Li, X.H., Deng, H.L., He, D.F., Wu, K.W., Bai, Z.J., 2008. SHRIMP zircon U-Pb geochronology, elemental, and Nd isotopic geochemistry of the Neoproterozoic mafic dykes in the Yanbian area, SW China. Precambrian Research 164(1), 66–85.
Zhu, Y., Lai, S.C., Zhao, S.W., Zhang, Z.Z., Qin, J.F., 2017. Geochemical characteristics and geological significance of the Neoproterozoic K-feldspar granites from the Anshunchang, Shimian area, Western Yangtze Block. Geological Review 63(5), 1193–1208 (in Chinese with English abstract).
Zhu, Y., Lai, S.C., Qin, J.F., Zhu, R.Z., Zhang, F.Y., Zhang, Z.Z., 2019a. Geochemistry and zircon U–Pb–Hf isotopes of the 780 Ma I-type granites in the western Yangtze Block: Petrogenesis and crustal evolution. International Geology Review 61(10), 1222­–1243.
Zhu, Y., Lai, S.C., Qin, J.F., Zhu, R.Z., Zhang, F.Y., Zhang, Z.Z., Zhao, S.W., 2019b. Neoproterozoic peraluminous granites in the western margin of the Yangtze Block, South China: Implications for the reworking of mature continental crust. Precambrian Research 333, 105443.
Zhu, Y., Lai, S.C., Qin, J.F., Zhu, R.Z., Zhang, F.Y., Zhang, Z.Z., Gan, B.P., 2019c. Petrogenesis and geodynamic implications of Neoproterozoic gabbro-diorites, adakitic granites, and A-type granites in the southwestern margin of the Yangtze Block, South China. Journal of Asian Earth Sciences 183, 103977.
Zhu, Y., Lai, S.C., Qin, J.F., Zhu, R.Z., Liu, M., Zhang, F.Y., Zhang, Z.Z., Yang, H., 2020a. Genesis of ca. 850–835 Ma high-Mg# diorites in the western Yangtze Block, South China: Implications for mantle metasomatism under the subduction process. Precambrian Research 343, 105738.
Zhu, Y., Lai, S.C., Qin, J.F., Zhu, R.Z., Zhang, F.Y., Zhang, Z.Z., 2020b. Petrogenesis and geochemical diversity of late Mesoproterozoic S-type granites in the western Yangtze Block, South China: Co-entrainment of peritectic selective phases and accessory minerals. Lithos 352–353, 105326.
Zhu, Y., Lai, S.C., Qin, J.F., Zhu, R.Z., Liu, M., Zhang, F.Y., Zhang, Z.Z., Yang, H., 2021a. Neoproterozoic metasomatized mantle beneath the western Yangtze Block, South China: Evidence from whole-rock geochemistry and zircon U–Pb–Hf isotopes of mafic rocks. Journal of Asian Earth Sciences 206, 104616.
Zhu, Y., Lai, S.C., Qin, J.F., Zhu, R.Z., Zhao, S.W., Liu, M., Zhang, F.Y., Zhang, Z.Z., Yang, H., 2021b. Peritectic assemblage entrainment (PAE) model for the petrogenesis of Neoproterozoic high-maficity I-type granitoids in the western Yangtze Block, South China. Lithos 402–403, 106247.
Zhu, Y., Lai, S.C., Qin, J.F., Zhu, R.Z., Zhao, S.W., Liu, M., Zhang, F.Y., Zhang, Z.Z., Yang, H., 2022. Magma mixing for the genesis of Neoproterozoic Mopanshan granitoids in the western Yangtze Block, South China. Journal of Asian Earth Sciences 231, 105227.
Zou, H., Bagas, L., Li, X.Y., Liu, H., Jiang, X.W., Li, Y., 2020. Origin and evolution of the Neoproterozoic Dengganping granitic complex in the western margin of the Yangtze Block, SW China: Implications for breakup of Rodinia Supercontinent. Lithos 370-371, 105602.
Zou H., Li, Q.L., Bagas, L., Wang, X.C., Chen, A.Q., Li, X.H., 2021. A neoproterozoic low-δ18O magmatic ring around South China: Implications for configuration and breakup of Rodinia supercontinent. Earth and Planetary Science Letters 575, 117196.

## Sheet: Feldspar data
Supplementary Data S2 Representative electron probe analyses of feldspar from the Neoproterozoic Nanba intrusive complex of the western Yangtze Block, South China
Sample	Lithology	SiO2	TiO2	Al2O3	Cr2O3	FeOT	MnO	MgO	CaO	Na2O	K2O	SrO	NiO	Total	An	Ab	Or	An (mol.%)	Ab (mol.%)	Or (mol.%)
21NB-3Pl1	Cumulate gabbro	59.109	0	26.1717	0.0904	0.0219	0.0327	6.6972	6.6523	1.1094	0.9121	0.152	0	100.949	0.333921	0.600218	0.0658607	33.3921	60.0218	6.58607
21NB-3Pl2		55.9214	0	26.8946	0.1481	0.002	0	9.2606	6.1421	0.0858	0.005	0.157	0.0338	98.6504	0.452231	0.54278	0.00498879	45.2231	54.278	0.498879
21NB-3Pl3		56.2857	0.0496	26.8707	0.0795	0	0	9.2701	5.7824	0.0908	0.0283	0.1342	0	98.5913	0.467193	0.527359	0.0054486	46.7193	52.7359	0.54486
21NB-3Pl4		56.4101	0	26.8675	0.1463	0	0	9.5791	5.9662	0.0874	0	0.087	0	99.1436	0.467736	0.527182	0.0050813	46.7736	52.7182	0.50813
21NB-3Pl5		55.504	0.0227	26.8621	0.3181	0	0.038	9.4694	6.1254	0.0776	0.125	0.2357	0	98.778	0.458646	0.536879	0.00447511	45.8646	53.6879	0.447511
21NB-3Pl6		56.054	0	27.3144	0.1138	0.002	0	9.8457	5.9028	0.0495	0	0.1636	0	99.4458	0.478261	0.518876	0.00286293	47.8261	51.8876	0.286293
21NB-3Pl7		59.0689	0.0042	25.7748	0.1173	0	0.0328	7.5591	7.2322	0.1358	0.0965	0.1194	0.0694	100.21	0.363273	0.628956	0.00777052	36.3273	62.8956	0.777052
21NB-3Pl8		56.0632	0.0413	27.0572	0.1084	0	0	9.9883	5.8011	0.0775	0.0683	0.0153	0	99.2206	0.485379	0.510137	0.00448413	48.5379	51.0137	0.448413
21NB-3Pl9		56.6495	0.0371	26.8835	0.2601	0	0.084	9.2953	5.8178	0.2591	0.1581	0.0819	0	99.5264	0.461723	0.522953	0.015324	46.1723	52.2953	1.5324
21NB-3Pl10		56.3822	0	26.9931	0.141	0	0	9.5765	5.7695	0.0578	0	0.1251	0	99.0452	0.476777	0.519796	0.00342629	47.6777	51.9796	0.342629
21NB-3Pl11		56.7293	0.0165	27.0449	0.2242	0	0.0027	9.4256	6.1999	0.0958	0.005	0.1969	0	99.9408	0.454047	0.540459	0.0054947	45.4047	54.0459	0.54947
21NB-3Pl12		56.8256	0.0163	26.8347	0.1498	0.028	0	9.4908	5.8042	0.0818	0	0.1005	0.026	99.3577	0.472377	0.522775	0.0048476	47.2377	52.2775	0.48476
21NB-3Pl13		56.3551	0	26.7984	0.1029	0	0	9.5272	5.93	0.0965	0	0.1661	0.0409	99.0171	0.467636	0.526725	0.00563971	46.7636	52.6725	0.563971
21NB-3Pl14		56.1076	0	26.8737	0.1011	0.024	0	9.847	5.795	0.1128	0	0.0285	0	98.8897	0.481092	0.512347	0.00656176	48.1092	51.2347	0.656176
21NB-3Pl15		56.1062	0.0243	27.1257	0.0993	0	0	9.7851	5.726	0.1209	0	0.1054	0	99.0929	0.482241	0.510665	0.00709434	48.2241	51.0665	0.709434
21NB-3Pl16		56.7967	0	26.9711	0.074	0	0.0283	9.7085	5.9733	0.0752	0	0.0669	0.0019	99.6959	0.471117	0.524538	0.00434492	47.1117	52.4538	0.434492
21NB-3Pl17		56.7616	0	26.879	0.0831	0.032	0	9.4199	6.0181	0.0802	0	0.0264	0.0037	99.304	0.461628	0.533693	0.00467958	46.1628	53.3693	0.467958
21NB-3Pl18		56.8945	0.0163	27.1862	0.0903	0	0.0027	9.7532	5.92	0.0392	0	0.01	0	99.9124	0.475469	0.522256	0.00227535	47.5469	52.2256	0.227535
21NB-3Pl19		56.2749	0.0243	27.08	0.0722	0.018	0	9.7199	6.1973	0.0915	0	0.0346	0	99.5127	0.461894	0.532929	0.00517712	46.1894	53.2929	0.517712
21NB-3Pl20		56.4201	0.0102	26.6724	0.1011	0.0401	0.0081	9.8888	5.7745	0.0703	0	0.0462	0	99.0318	0.48422	0.511682	0.00409866	48.422	51.1682	0.409866
21NB-3Pl21		56.1852	0	27.0329	0.0975	0	0.0054	9.8861	5.7703	0.0605	0	0.0515	0.0037	99.0931	0.484609	0.51186	0.00353109	48.4609	51.186	0.353109
21NB-3Pl22		56.1268	0.0081	26.8514	0.1408	0.01	0	9.622	5.7706	0.0213	0	0	0.0371	98.5881	0.478946	0.519791	0.00126237	47.8946	51.9791	0.126237
21NB-3Pl23		56.6601	0.0203	26.2682	0.0235	0	0.0122	9.1487	6.4117	0.1097	0	0.0307	0	98.6851	0.438114	0.555632	0.00625491	43.8114	55.5632	0.625491
21NB-3Pl24		57.2713	0.0466	26.5268	0.166	0	0.0175	8.8295	6.0695	0.0933	0	0.0822	0.0706	99.1733	0.443158	0.551267	0.00557559	44.3158	55.1267	0.557559
21NB-3Pl25		57.006	0	26.6221	0.1084	0	0	9.3905	6.0977	0.0818	0	0.0343	0	99.3408	0.457573	0.537681	0.00474583	45.7573	53.7681	0.474583
21NB-3Pl26		55.9056	0.0142	26.5361	0.0469	0.028	0	9.4891	5.9082	0.1014	0	0.0243	0.0539	98.1077	0.467411	0.526642	0.00594701	46.7411	52.6642	0.594701
21NB-3Pl27		55.2441	0.0122	27.3719	0.0975	0	0.0536	8.915	5.2861	1.0974	0	0.0653	0.013	98.1561	0.450538	0.483428	0.0660332	45.0538	48.3428	6.60332
21NB-3Pl28		56.3584	0	26.9493	0.1174	0.0401	0	9.4301	5.9964	0.0393	0	0.0132	0.0093	98.9535	0.463895	0.533803	0.00230188	46.3895	53.3803	0.230188
21NB-3Pl29		55.8358	0.0243	27.0942	0.1661	0	0.008	9.8044	5.6625	0.0752	0	0.028	0.0204	98.7189	0.486791	0.508764	0.00444556	48.6791	50.8764	0.444556
21NB-3Pl30		56.1648	0	27.0424	0.0795	0.01	0	9.9248	5.753	0.1013	0	0.0361	0	99.1119	0.485175	0.508929	0.00589621	48.5175	50.8929	0.589621
21NB-2Pl1	Hornblende Gabbro	56.2479	0	26.6978	0.0923	0	0	9.5351	6.0412	0.1173	0.0383	0.1472	0	98.9171	0.462711	0.530511	0.00677751	46.2711	53.0511	0.677751
21NB-2Pl2		56.5739	0.0145	26.684	0.0922	0	0.0068	9.0358	6.3367	0.0695	0.0583	0.1811	0	99.0528	0.438939	0.557041	0.00401985	43.8939	55.7041	0.401985
21NB-2Pl3		56.4656	0.0165	26.695	0.1157	0.0079	0	9.4271	6.1573	0.0943	0.0217	0.2358	0	99.2369	0.455818	0.538753	0.0054289	45.5818	53.8753	0.54289
21NB-2Pl4		57.9593	0	26.0793	0.1067	0	0.0327	8.5606	6.7409	0.0928	0.0267	0.095	0	99.694	0.410196	0.584509	0.00529447	41.0196	58.4509	0.529447
21NB-2Pl5		56.289	0	26.586	0.0488	0	0	9.0424	6.2379	0.1224	0.0334	0.1853	0.0788	98.624	0.441602	0.55128	0.00711731	44.1602	55.128	0.711731
21NB-2Pl6		56.9991	0.031	26.9373	0.0759	0	0.0041	9.1006	6.375	0.0496	0.0317	0.1612	0.045	99.8105	0.439728	0.557418	0.00285354	43.9728	55.7418	0.285354
21NB-2Pl7		57.2831	0	26.4055	0.0887	0	0.0095	9.0111	6.4256	0.0778	0.0517	0.1389	0	99.4919	0.434655	0.560877	0.00446821	43.4655	56.0877	0.446821
21NB-2Pl8		56.9146	0	26.8718	0.0344	0	0.0014	9.2243	6.2037	0.053	0	0.1035	0.0244	99.4311	0.449665	0.547259	0.00307623	44.9665	54.7259	0.307623
21NB-2Pl9		56.2068	0	27.1294	0.0941	0	0.0081	9.6227	5.8352	0.081	0.025	0.1231	0	99.1254	0.474525	0.52072	0.00475591	47.4525	52.072	0.475591
21NB-2Pl10		57.387	0	26.6064	0.1176	0.0179	0.0095	8.7652	6.6392	0.154	0.085	0.1134	0.0338	99.929	0.418128	0.573125	0.00874692	41.8128	57.3125	0.874692
21NB-2Pl11		56.6286	0.0124	26.911	0.1211	0	0	9.628	6.0994	0.0776	0	0.2042	0	99.6823	0.463822	0.531727	0.00445107	46.3822	53.1727	0.445107
21NB-2Pl12		56.7222	0	26.5232	0.0488	0.0478	0.0571	8.9159	6.4002	0.0695	0.2219	0.1056	0.0188	99.131	0.43322	0.56276	0.00402082	43.322	56.276	0.402082
21NB-2Pl13		55.5604	0.0517	27.0273	0.0615	0.0578	0.0473	10.0031	5.5772	0.0826	0.1635	0.1846	0	98.817	0.495349	0.499781	0.00487017	49.5349	49.9781	0.487017
21NB-2Pl14		59.6534	0.0227	24.5458	0.047	0	0	7.0305	7.6101	0.0632	0	0.2131	0	99.1858	0.336756	0.659639	0.00360441	33.6756	65.9639	0.360441
21NB-2Pl15		57.1801	0.0538	26.182	0.076	0.0339	0.0082	8.5636	6.5746	0.0812	0.1335	0.1511	0	99.038	0.416562	0.578735	0.00470291	41.6562	57.8735	0.470291
21NB-2Pl16		56.0795	0	27.1802	0.0435	0	0	9.6762	5.7053	0.0612	0.0367	0.0307	0	98.8133	0.482039	0.514331	0.00363008	48.2039	51.4331	0.363008
21NB-2Pl17		56.7698	0	26.6482	0.0778	0.0159	0.0122	9.0948	6.2278	0.0778	0	0.167	0.0075	99.0988	0.444573	0.550898	0.00452811	44.4573	55.0898	0.452811
21NB-2Pl18		56.6959	0	27.0821	0.152	0.024	0.0122	8.6321	6.0696	0.7036	0.065	0.1513	0	99.5878	0.422036	0.537006	0.0409586	42.2036	53.7006	4.09586
21NB-2Pl19		68.015	0.0221	18.8817	0.0576	0	0.007	1.8658	10.5574	0.0779	0	0.0702	0.0019	99.5566	0.0885802	0.907016	0.00440348	8.85802	90.7016	0.440348
21NB-2Pl20		68.7604	0	19.1414	0.0648	0	0.0194	0.2435	11.1097	0.0998	0	0.1532	0.0129	99.6051	0.0118974	0.982297	0.00580593	1.18974	98.2297	0.580593
21NB-2Pl21		68.54	0	18.8597	0.1369	0	0.0014	0.1303	11.7378	0.0432	0	0.0466	0	99.4959	0.00608235	0.991517	0.00240103	0.608235	99.1517	0.240103
21NB-2Pl22		63.0069	0.0527	17.5545	0.4084	0.0439	0.0614	0.235	2.0427	13.2252	0	0.195	0.0221	96.8478	0.0119422	0.187848	0.80021	1.19422	18.7848	80.021
21NB-2Pl23		66.3665	0	19.7832	0.1423	0	0.0111	1.4928	10.1404	1.1998	0	0.209	0.026	99.3711	0.0701781	0.862664	0.0671578	7.01781	86.2664	6.71578
21NB-2Pl24		68.9548	0	18.3442	0.0917	0	0.0027	0.1394	11.267	0.0133	0	0.1505	0.0445	99.0081	0.00678538	0.992444	0.000770815	0.678538	99.2444	0.0770815
21NB-5Pl1	Gabbro-diorite	59.2065	0.0578	25.5192	0.085	0	0	7.1319	7.1955	0.0582	0	0.165	0.015	99.4341	0.352675	0.643898	0.00342673	35.2675	64.3898	0.342673
21NB-5Pl2		59.0047	0	25.4674	0.0308	0.0159	0.0137	7.6731	7.0934	0.078	0	0.1734	0.0094	99.5598	0.372439	0.623053	0.00450781	37.2439	62.3053	0.450781
21NB-5Pl3		58.3381	0	25.7993	0.0597	0	0.0123	7.7483	7.0982	0.1278	0.0467	0.1234	0.0113	99.3651	0.373493	0.619172	0.0073349	37.3493	61.9172	0.73349
21NB-5Pl4		59.2259	0.0435	24.4578	0.0416	0.008	0.0136	6.7148	6.1346	1.9743	0	0.2004	0	98.8145	0.332963	0.550473	0.116564	33.2963	55.0473	11.6564
21NB-5Pl5		58.8464	0.0392	25.4511	0.1212	0.0358	0.019	8.0153	6.495	0.4426	0	0.1211	0.0507	99.6374	0.394925	0.579109	0.0259653	39.4925	57.9109	2.59653
21NB-5Pl6		59.3208	0	24.9082	0.0976	0	0	7.3027	6.919	0.4762	0.0466	0.13	0.0075	99.2086	0.358144	0.61405	0.0278067	35.8144	61.405	2.78067
21NB-5Pl7		60.0597	0	23.9385	0.1554	0	0.0191	6.3759	7.2035	0.605	0	0.1363	0.0169	98.5103	0.316708	0.647511	0.0357816	31.6708	64.7511	3.57816
21NB-5Pl8		57.6188	0.0042	26.2721	0.1103	0	0	8.923	6.2154	0.4103	0	0.1029	0.0244	99.6814	0.431918	0.544435	0.0236472	43.1918	54.4435	2.36472
21NB-5Pl9		57.4535	0.0578	26.4697	0.1085	0	0.0285	8.8274	6.2678	0.3374	0	0.1245	0.0113	99.6864	0.429109	0.551362	0.0195284	42.9109	55.1362	1.95284
21NB-5Pl10		57.4593	0.0496	26.2861	0.1447	0	0.015	8.6557	6.3866	0.192	0	0.086	0.0094	99.2844	0.423436	0.565381	0.0111834	42.3436	56.5381	1.11834
21NB-5Pl11		58.779	0	25.7737	0.1573	0	0.0081	7.8264	6.745	0.3731	0	0.1122	0	99.7748	0.382214	0.596091	0.0216949	38.2214	59.6091	2.16949
21NB-5Pl12		56.7138	0.0249	26.4541	0.1447	0.0159	0.0366	9.2148	6.082	0.4164	0.01	0.1442	0.0281	99.2855	0.444801	0.531267	0.0239319	44.4801	53.1267	2.39319
21NB-5Pl13		57.732	0	26.1479	0.1952	0.0199	0	8.5357	6.5132	0.2417	0.02	0.1108	0.0113	99.5277	0.414156	0.571881	0.0139633	41.4156	57.1881	1.39633
21NB-5Pl14		51.335	0.0618	31.6614	0.4304	0.0278	0.0874	1.0443	2.6821	8.393	0.1029	0.1054	0.0299	95.9614	0.0657162	0.305428	0.628856	6.57162	30.5428	62.8856
21NB-5Pl15		57.5176	0	25.8439	0.1519	0.014	0.0123	8.5393	6.4023	0.4898	0.025	0.0811	0.045	99.1222	0.412363	0.559475	0.028162	41.2363	55.9475	2.8162
21NB-5Pl16		59.032	0	25.0763	0.1157	0	0	7.323	7.0151	0.4829	0	0.1415	0	99.1865	0.355613	0.616466	0.0279211	35.5613	61.6466	2.79211
21NB-5Pl17		64.007	0	22.2895	0	0	0	3.7817	9.0646	0.0828	0	0.0115	0	99.2371	0.18644	0.8087	0.00486037	18.644	80.87	0.486037
21NB-5Pl18		66.8506	0	21.041	0.056	0.01	0.0221	1.7379	10.1459	0.3127	0	0.2496	0.0428	100.469	0.0848982	0.896914	0.0181882	8.48982	89.6914	1.81882
21NB-5Pl19		63.4538	0	22.7478	0.0976	0.014	0.0656	3.5047	8.5002	0.4425	0	0.1863	0.0261	99.0386	0.180527	0.792334	0.0271389	18.0527	79.2334	2.71389
21NB-5Pl20		59.9692	0	24.7906	0.0036	0	0.0041	6.7552	7.6503	0.1152	0	0.0526	0	99.3408	0.325764	0.667621	0.00661462	32.5764	66.7621	0.661462
21NB-5Pl21		58.8769	0.0466	25.6143	0.0163	0.0301	0	7.5862	6.9552	0.0444	0	0.016	0	99.186	0.375085	0.622302	0.00261382	37.5085	62.2302	0.261382
21NB-5Pl22		58.9006	0.0366	25.2209	0.0687	0.002	0	7.8649	6.887	0.0394	0	0.036	0	99.0561	0.386014	0.611683	0.00230247	38.6014	61.1683	0.230247
21NB-5Pl23		59.2154	0	25.3252	0.0561	0.0201	0	7.8571	6.9589	0.0839	0	0	0	99.5167	0.382342	0.612797	0.00486115	38.2342	61.2797	0.486115
21NB-5Pl24		58.9783	0	26.2529	0.0523	0.0601	0.0298	5.3587	6.9755	1.4174	0	0.089	0.0298	99.2438	0.27244	0.64176	0.0858006	27.244	64.176	8.58006
21NB-7Pl1	Diorite	68.5982	0	18.8781	0.2367	0.0298	0.178	0.1374	11.7504	0.1178	0.0764	0.1508	0	100.154	0.00637842	0.98711	0.00651117	0.637842	98.711	0.651117
21NB-7Pl2		66.3475	0	18.5184	0.6611	0.012	0.2391	0.2557	6.6705	6.4054	0.0649	0.1019	0.015	99.2915	0.0128149	0.604962	0.382223	1.28149	60.4962	38.2223
21NB-7Pl3		57.3127	0.0495	25.6315	0.1626	0	0.019	8.4625	6.4339	0.4595	0.0516	0.0123	0.0056	98.6007	0.409757	0.563752	0.0264911	40.9757	56.3752	2.64911
21NB-7Pl4		63.8069	0.0309	22.3107	0.0434	0	0.0028	2.7921	9.6134	0.8584	0	0.1143	0.0188	99.5917	0.131636	0.820178	0.048186	13.1636	82.0178	4.8186
21NB-7Pl5		59.3436	0	24.502	0.132	0.0358	0	6.8391	7.4163	0.3122	0.0533	0.0487	0	98.683	0.331489	0.650494	0.0180173	33.1489	65.0494	1.80173
21NB-7Pl6		58.1703	0.0042	25.3746	0.114	0	0.0354	7.8863	6.7336	0.4904	0.08	0.0601	0	98.9489	0.381803	0.589929	0.0282685	38.1803	58.9929	2.82685
21NB-7Pl7		58.045	0.0268	25.8116	0.1917	0.002	0.019	7.8303	6.4312	0.3648	0.09	0.1238	0.0657	99.0019	0.39343	0.584746	0.0218238	39.343	58.4746	2.18238
17NB-5Pl1		57.6095	0.0413	25.9955	0.1448	0	0.0027	8.5111	6.5827	0.1706	0	0.1841	0	99.2423	0.412632	0.57752	0.00984789	41.2632	57.752	0.984789
17NB-5Pl2		57.7984	0.0042	26.2713	0.1374	0	0	8.7997	6.4834	0.2036	0.0683	0.1717	0	99.938	0.42358	0.564751	0.011669	42.358	56.4751	1.1669
17NB-5Pl3		58.7188	0	26.4131	0.1392	0	0.0218	8.385	6.6961	0.1143	0	0.1739	0	100.662	0.40628	0.587126	0.00659411	40.628	58.7126	0.659411
17NB-5Pl4		58.4626	0.0331	26.0133	0.1572	0	0.0068	8.4058	6.8631	0.1822	0	0.1288	0.0206	100.273	0.399471	0.590219	0.0103096	39.9471	59.0219	1.03096
17NB-5Pl5		57.4744	0	25.4696	0.0578	0.0358	0	7.9889	7.696	0.1176	0.0217	0.117	0	98.9788	0.362214	0.631437	0.00634853	36.2214	63.1437	0.634853
17NB-5Pl6		58.0892	0	26.2195	0.1085	0.0199	0	8.8279	6.6457	0.192	0	0.0286	0	100.131	0.418728	0.570429	0.0108433	41.8728	57.0429	1.08433
17NB-5Pl7		58.046	0.0103	26.6517	0.1103	0	0	9.0883	6.6582	0.1142	0	0.1568	0.0526	100.888	0.427221	0.566387	0.0063918	42.7221	56.6387	0.63918
17NB-5Pl8		58.1219	0.0538	26.305	0.0814	0.0199	0	8.8386	6.6772	0.1341	0	0.217	0	100.449	0.41926	0.573166	0.00757383	41.926	57.3166	0.757383
17NB-1Pl1	Granodiorite	59.5997	0	23.8876	0.1174	0	0.0054	6.38	8.0506	0.1429	0	0.0933	0	98.2769	0.302103	0.689841	0.00805663	30.2103	68.9841	0.805663
17NB-1Pl2		60.4817	0	23.4079	0.1898	0	0	5.777	8.1178	0.2347	0	0.0406	0	98.2495	0.278456	0.708074	0.0134696	27.8456	70.8074	1.34696
17NB-1Pl3		60.2517	0.0165	23.7788	0.0723	0.0059	0	5.9611	8.237	0.1049	0	0.0071	0	98.4353	0.283973	0.710077	0.00594994	28.3973	71.0077	0.594994
17NB-1Pl4		60.645	0.0165	23.3726	0.0777	0.0059	0.0028	5.6453	8.1037	0.333	0	0.049	0	98.2515	0.272636	0.708216	0.0191482	27.2636	70.8216	1.91482
17NB-1Pl5		60.5786	0	23.5321	0.0072	0.0299	0.0289	5.3261	8.4289	0.1799	0.0166	0.132	0.0488	98.309	0.256144	0.733555	0.0103013	25.6144	73.3555	1.03013
17NB-1Pl6		59.6209	0.0227	24.0145	0.1428	0.0339	0.011	6.3798	7.9678	0.2144	0.0516	0.13	0	98.5894	0.303025	0.68485	0.012125	30.3025	68.485	1.2125
17NB-1Pl7		60.9916	0.0021	24.5106	0.1084	0.0418	0	6.0652	8.0528	0.2229	0.1332	0.1011	0.0019	100.232	0.290158	0.697145	0.0126966	29.0158	69.7145	1.26966
17NB-1Pl8		61.7133	0	24.1058	0.0958	0.0079	0.015	5.7042	8.2363	0.1949	0	0.1764	0	100.25	0.273704	0.715162	0.0111349	27.3704	71.5162	1.11349
17NB-1Pl9		61.4738	0	24.2006	0.0994	0.0477	0.0055	6.1814	8.4118	0.1331	0.0316	0.0867	0.0507	100.722	0.28668	0.70597	0.00734981	28.668	70.597	0.734981
17NB-1Pl10		61.1143	0.0516	24.5374	0.0633	0	0.0178	6.3348	7.8718	0.3691	0.0034	0.0697	0	100.433	0.301381	0.67771	0.0209081	30.1381	67.771	2.09081
17NB-1Pl11		61.4449	0	23.8763	0.1248	0	0.011	5.7784	8.1528	0.2763	0	0	0	99.6645	0.276998	0.707232	0.0157702	27.6998	70.7232	1.57702
17NB-1Pl12		60.3529	0	24.3648	0.1736	0.0079	0.0096	6.2893	7.6076	0.3342	0.035	0.0978	0.0094	99.2821	0.307484	0.673061	0.0194542	30.7484	67.3061	1.94542
17NB-1Pl13		59.8002	0	24.3606	0.0253	0	0.0233	6.366	7.8068	0.0765	0.105	0.2029	0	98.7666	0.309263	0.686312	0.00442497	30.9263	68.6312	0.442497
17NB-1Pl14		60.3466	0	23.0411	0.0795	0.014	0.0054	5.8622	7.9075	0.2247	0.0117	0.1282	0.0075	97.6284	0.286811	0.7001	0.0130895	28.6811	70.01	1.30895
17NB-1Pl15		61.3771	0	23.858	0.141	0	0	5.9565	8.2793	0.3643	0.1598	0.0046	0.0075	100.148	0.278698	0.701007	0.020295	27.8698	70.1007	2.0295
17NB-1Pl16		58.4289	0.0227	24.8505	0.1899	0	0.0068	7.8003	7.0363	0.1956	0.0017	0.0496	0	98.5823	0.375625	0.61316	0.011215	37.5625	61.316	1.1215
17NB-1Pl17		59.8459	0.031	24.9876	0.0958	0.0219	0	7.1834	7.2615	0.2125	0.1499	0.0822	0.0113	99.883	0.3491	0.638604	0.012296	34.91	63.8604	1.2296
17NB-1Pl18		59.3944	0	24.2519	0.0994	0	0.0219	6.3058	7.802	0.2261	0.0516	0.1113	0	98.2644	0.304722	0.682269	0.0130092	30.4722	68.2269	1.30092
17NB-1Pl19		60.2684	0.0042	24.1318	0.1355	0	0.0301	6.4703	7.6502	0.3922	0.065	0.106	0.0545	99.3082	0.311354	0.666175	0.0224711	31.1354	66.6175	2.24711
17NB-1Pl20		54.2448	0	21.5013	0.2856	0.004	0.2009	6.0652	6.3002	0.2989	0.4511	0.0691	0	89.4211	0.34032	0.639711	0.019969	34.032	63.9711	1.9969
17NB-1Pl21		60.076	0	24.3503	0.0904	0.0079	0.0561	6.4372	7.7222	0.2576	0.0083	0.053	0.0394	99.0984	0.310704	0.674492	0.0148041	31.0704	67.4492	1.48041
17NB-1Pl22		58.184	0.0227	26.1592	0.0958	0.004	0.0217	6.5995	6.7221	1.0227	0.02	0.1147	0	98.9664	0.330279	0.608781	0.0609404	33.0279	60.8781	6.09404
17NB-1Pl23		57.3908	0	26.2829	0.047	0.0378	0.0027	8.5547	6.5465	0.1506	0.055	0.0299	0	99.0979	0.415667	0.57562	0.0087127	41.5667	57.562	0.87127
17NB-1Pl24		60.2839	0	25.1329	0.0777	0	0.0082	7.0025	7.6864	0.1777	0	0.087	0.0469	100.503	0.331503	0.658481	0.0100163	33.1503	65.8481	1.00163
21NB-1Pl1		60.2719	0	24.3459	0.083	0.016	0	6.7103	7.4834	0.2514	0	0.0441	0	99.206	0.326508	0.658927	0.0145648	32.6508	65.8927	1.45648
21NB-1Pl2		60.6335	0.0081	24.1313	0.1732	0.002	0	6.6245	7.6398	0.2399	0	0.0589	0	99.5112	0.31948	0.666744	0.0137755	31.948	66.6744	1.37755
21NB-1Pl3		62.5948	0	23.2283	0.0343	0.054	0	5.1929	8.4269	0.1714	0	0.0922	0.0185	99.8133	0.251516	0.7386	0.00988446	25.1516	73.86	0.988446
21NB-1Pl4		56.4758	0.0182	22.8402	0.2706	0	0.0851	6.3275	6.0258	0.7276	0	0.0896	0	92.8604	0.34962	0.602512	0.0478679	34.962	60.2512	4.78679
21NB-1Pl5		58.5614	0	25.6934	0.092	0.026	0.004	8.0423	6.8674	0.1278	0	0	0	99.4143	0.38999	0.602631	0.00737889	38.999	60.2631	0.737889
21NB-1Pl6		59.5421	0.0344	24.8993	0.1587	0.018	0	6.8503	7.3153	0.3153	0	0.0755	0.0204	99.2293	0.334755	0.646899	0.0183455	33.4755	64.6899	1.83455
21NB-1Pl7		59.1581	0.0142	25.0864	0.0667	0	0.004	7.6836	6.8329	0.2362	0	0.0638	0.0594	99.2053	0.377948	0.608218	0.0138336	37.7948	60.8218	1.38336
21NB-1Pl8		61.3653	0	23.9361	0.1623	0.026	0.0027	6.123	7.9599	0.2895	0	0.069	0	99.9338	0.293359	0.690127	0.0165147	29.3359	69.0127	1.65147
21NB-1Pl9		59.9804	0.0202	24.0354	0.1371	0.002	0.0014	6.6532	7.4358	0.2317	0	0.1268	0	98.624	0.326377	0.66009	0.0135332	32.6377	66.009	1.35332
21NB-1Pl10		57.85	0.0122	25.562	0.1406	0	0	8.1496	6.5618	0.2703	0	0.0707	0.013	98.6302	0.400555	0.583627	0.0158183	40.0555	58.3627	1.58183
21NB-1Pl11		59.5839	0	25.028	0.128	0	0.0081	7.3667	6.9853	0.2393	0	0.0328	0	99.3721	0.363029	0.62293	0.014041	36.3029	62.293	1.4041
21NB-1Pl12		60.5426	0.0021	24.1326	0.1693	0.008	0	6.7779	7.6077	0.1313	0	0	0	99.3715	0.327415	0.665033	0.00755188	32.7415	66.5033	0.755188
21NB-1Pl13		59.8952	0.0162	24.3134	0.1713	0	0.0163	6.4741	7.2968	0.2728	0	0.1033	0	98.5594	0.323651	0.660111	0.0162379	32.3651	66.0111	1.62379
21NB-1Pl14		60.8205	0	24.2689	0.1926	0.016	0.0014	6.5934	7.6394	0.2887	0	0.0953	0	99.9162	0.317578	0.665865	0.0165567	31.7578	66.5865	1.65567
21NB-1Pl15		59.1382	0.0708	24.843	0.0721	0	0	7.2714	7.2116	0.1213	0	0.0223	0	98.7507	0.355291	0.637652	0.0070569	35.5291	63.7652	0.70569
21NB-1Pl16		59.8947	0	23.6514	0.1405	0	0	7.2303	6.9311	0.428	0	0	0.0278	98.3038	0.356479	0.618396	0.0251252	35.6479	61.8396	2.51252
21NB-1Pl17		60.8533	0.0322	23.9953	0.126	0.002	0.0014	6.4436	7.6146	0.2625	0	0.0139	0	99.3448	0.313776	0.671004	0.0152198	31.3776	67.1004	1.52198
21NB-1Pl18		58.9697	0.0202	25.1777	0.1116	0.0319	0.0189	7.9127	6.5779	0.2994	0	0	0.0426	99.1626	0.392249	0.59008	0.0176716	39.2249	59.008	1.76716
17NB-4Pl1	K-feldspar granite	69.1974	0.0226	18.7288	0	0.0059	0	0.0139	12.1147	0.0842	0.0465	0.1208	0.0432	100.378	0.000630754	0.99482	0.0045493	0.0630754	99.482	0.45493
17NB-4Pl2		68.679	0	18.8007	0.0217	0.0239	0.0098	0.0293	12.0924	0.0673	0.1213	0.0892	0.0094	99.944	0.0013323	0.995024	0.00364365	0.13323	99.5024	0.364365
17NB-4Pl3		69.282	0	18.87	0.0542	0	0.0196	0.0478	12.0276	0.0488	0	0.0774	0.0563	100.484	0.00218552	0.995158	0.00265664	0.218552	99.5158	0.265664
17NB-4Pl4		69.3993	0	18.9312	0	0.014	0	0.0201	12.1163	0.0471	0	0.1093	0	100.637	0.000913552	0.996538	0.00254886	0.0913552	99.6538	0.254886
17NB-4Pl5		69.5548	0	18.9339	0.0271	0	0	0.0355	11.7937	0.0775	0	0.072	0.0395	100.534	0.00165348	0.994049	0.00429794	0.165348	99.4049	0.429794
17NB-4Pl6		68.5615	0	18.9405	0	0	0.0056	0.139	11.7521	0.0624	0.005	0.1192	0.0451	99.6304	0.00647111	0.99007	0.00345888	0.647111	99.007	0.345888
17NB-4Pl7		68.3863	0.0349	18.9795	0.0487	0	0	0.0077	11.5092	0.0943	0	0.1029	0.0075	99.171	0.000367591	0.994272	0.0053601	0.0367591	99.4272	0.53601
17NB-4Pl8		68.3392	0	19.1379	0	0	0.0127	0.0232	12.0371	0.0539	0	0.1527	0.0469	99.8036	0.00106082	0.996005	0.00293447	0.106082	99.6005	0.293447
17NB-4Pl9		68.4925	0	18.7106	0.0199	0.0079	0.0112	0.0293	11.7819	0.032	0	0.1743	0	99.2596	0.00136992	0.996849	0.00178141	0.136992	99.6849	0.178141
17NB-4Pl10		69.0304	0.0164	18.6936	0.0633	0	0	0	12.0237	0.0826	0.005	0.1418	0.0094	100.066	0	0.9955	0.0044997	0	99.55	0.44997
17NB-4Pl11		67.451	0.0492	18.5745	0.0289	0	0	0.2254	11.5636	0.133	0.0615	0.1003	0.032	98.2194	0.0105775	0.981991	0.00743134	1.05775	98.1991	0.743134
17NB-4Pl12		69.2349	0	18.9133	0.0723	0.0099	0.0168	0.017	11.9989	0.0471	0.0034	0.0238	0	100.337	0.0007803	0.996646	0.00257407	0.07803	99.6646	0.257407
17NB-4Pl13		69.2812	0.0185	18.6275	0	0	0.0252	0.0232	12.0638	0.0505	0	0.0799	0.0339	100.204	0.00105868	0.996198	0.00274381	0.105868	99.6198	0.274381
17NB-4Pl14		69.1846	0	18.9082	0.0217	0	0	0.0711	12.0371	0.1045	0.0382	0.1319	0	100.497	0.00323505	0.991104	0.00566127	0.323505	99.1104	0.566127
17NB-4Pl15		68.7446	0.0021	18.8358	0.0253	0.0079	0	0.051	11.7472	0.1263	0.0482	0.1876	0	99.776	0.00237659	0.990616	0.00700769	0.237659	99.0616	0.700769
17NB-4Pl16		69.5062	0	18.8311	0.0434	0	0	0.0154	11.6365	0.0742	0.0333	0.2231	0	100.363	0.000727742	0.995097	0.00417492	0.0727742	99.5097	0.417492
17NB-4Pl17		69.0905	0	18.7331	0.009	0	0.0028	0.017	11.9948	0.0506	0	0.0775	0	99.9753	0.000780417	0.996454	0.00276577	0.0780417	99.6454	0.276577
17NB-4Pl18		68.2126	0	18.9673	0.0109	0	0.0141	0.0571	11.7742	0.091	0	0.0071	0.0207	99.155	0.00265925	0.992295	0.00504605	0.265925	99.2295	0.504605
17NB-4Pl19		68.5249	0	18.8708	0.0326	0.0219	0.0056	0.0819	11.962	0.0286	0.0316	0.0934	0.0301	99.6834	0.00376334	0.994672	0.00156474	0.376334	99.4672	0.156474
17NB-4Pl20		68.4079	0.0144	18.7736	0.018	0.0318	0	0.0525	11.5411	0.0404	0.0133	0.0746	0.0245	98.9921	0.00250172	0.995206	0.00229218	0.250172	99.5206	0.229218
17NB-4Pl21		68.9424	0	18.8531	0.0921	0	0	0.0139	11.7522	0.0842	0.0532	0.0582	0	99.8493	0.000650106	0.994661	0.00468888	0.0650106	99.4661	0.468888
17NB-4-2Pl1		68.9277	0	18.6987	0	0	0	0.0662	11.7235	0.0284	0	0.0973	0.0149	99.5567	0.00310579	0.995308	0.00158642	0.310579	99.5308	0.158642
17NB-4-2Pl2		69.4398	0	18.7047	0.0598	0	0.0125	0.037	11.4557	0.0636	0	0.0876	0	99.8607	0.00177516	0.994592	0.00363313	0.177516	99.4592	0.363313
17NB-4-2Pl3		69.2183	0	18.6398	0.0199	0.002	0.0237	0.0709	11.8645	0.0452	0	0.1219	0	100.006	0.00328318	0.994225	0.00249215	0.328318	99.4225	0.249215
17NB-4-2Pl4		69.1465	0	18.6434	0.0524	0.028	0.007	0.0216	11.6401	0.0668	0	0.0889	0	99.6947	0.00102054	0.995222	0.00375786	0.102054	99.5222	0.375786
17NB-4-2Pl5		68.6338	0.0343	18.6623	0.0488	0	0	0.0123	11.8129	0.0986	0	0.1429	0.0522	99.4981	0.00057192	0.993969	0.00545876	0.057192	99.3969	0.545876
17NB-4-2Pl6		69.4482	0.0101	18.707	0.0126	0	0	0	11.8931	0.0268	0	0.1114	0	100.209	0	0.99852	0.00148046	0	99.852	0.148046
17NB-4-2Pl7		69.3702	0.008	18.5065	0.0109	0.004	0	0.0216	12.0007	0.0067	0	0.0838	0	100.012	0.000993275	0.99864	0.000366841	0.0993275	99.864	0.0366841
17NB-4-2Pl8		68.4803	0	18.7614	0.1574	0.014	0.0417	0.0848	10.9519	0.299	0	0.0604	0.0373	98.8882	0.00418568	0.978242	0.0175723	0.418568	97.8242	1.75723
17NB-4-2Pl9		69.5689	0.004	18.777	0	0.028	0	0.0062	11.8502	0.0168	0	0.1088	0	100.36	0.000288768	0.99878	0.000931652	0.0288768	99.878	0.0931652
17NB-4-2Pl10		69.9828	0	18.8869	0	0	0	0.0231	11.4635	0.0502	0	0.1591	0	100.566	0.00110912	0.996021	0.00286983	0.110912	99.6021	0.286983
17NB-4-2Pl11		69.1344	0	18.868	0	0.004	0.0014	0.0123	11.6346	0.0568	0	0.0836	0.013	99.8081	0.000581998	0.996218	0.00320001	0.0581998	99.6218	0.320001
17NB-4-2Pl12		69.817	0	18.7188	0	0	0	0.0431	12.0472	0.0485	0	0.0987	0	100.773	0.00196789	0.995395	0.00263665	0.196789	99.5395	0.263665
17NB-4-2Pl13		69.3502	0.0464	18.7937	0	0	0.0125	0.0323	11.8964	0.0752	0	0.0961	0	100.303	0.00149193	0.994372	0.00413573	0.149193	99.4372	0.413573
17NB-4-2Pl14		69.5656	0.0221	18.925	0.0036	0.0221	0	0.0092	11.4152	0.0301	0	0.0943	0.0037	100.091	0.000444398	0.997824	0.00173116	0.0444398	99.7824	0.173116
17NB-4-2Pl15		69.5386	0.0807	18.9018	0	0	0.0279	0	11.9089	0.0467	0	0.0596	0	100.564	0	0.997426	0.00257352	0	99.7426	0.257352
17NB-4-2Pl16		69.4826	0	19.088	0.0073	0	0	0.077	11.7041	0.0752	0	0.1498	0.0261	100.61	0.00360715	0.992198	0.00419449	0.360715	99.2198	0.419449
17NB-4-2Pl17		69.4745	0	18.61	0.0054	0	0.007	0.0092	11.5468	0.0418	0	0.1067	0	99.8014	0.000439052	0.997186	0.00237515	0.0439052	99.7186	0.237515
17NB-4-2Pl18		69.8691	0	19.0414	0.0127	0	0.0028	0.0293	11.649	0.0385	0	0.0296	0.0131	100.685	0.00138499	0.996448	0.00216684	0.138499	99.6448	0.216684
17NB-4-2Pl19		67.9442	0	19.362	0.0816	0	0.0347	0.0294	10.3292	0.377	0	0.1295	0.0412	98.3288	0.00153363	0.975051	0.0234155	0.153363	97.5051	2.34155
17NB-4-2Pl20		69.3998	0.0122	19.0704	0	0.0381	0	0.0062	11.6386	0.0536	0	0.0817	0.0037	100.304	0.000293402	0.996686	0.00302011	0.0293402	99.6686	0.302011
17NB-4-2Pl21		69.1317	0.0243	19.103	0.0055	0	0.0056	0.0278	11.2797	0.0569	0	0.0975	0	99.732	0.0013556	0.995341	0.0033036	0.13556	99.5341	0.33036
17NB-4-2Pl22		69.0199	0	18.9396	0	0	0	0	10.9218	0.0469	0	0.1204	0	99.0486	0	0.997183	0.00281744	0	99.7183	0.281744
17NB-4-2Pl23		69.3738	0.0506	19.0788	0	0.008	0	0.0062	11.475	0.0285	0	0.1877	0	100.209	0.000297998	0.998071	0.001631	0.0297998	99.8071	0.1631
17NB-4-2Pl24		69.011	0	18.9983	0.0036	0.01	0.0335	0.0478	11.4732	0.0486	0	0.125	0	99.751	0.00229062	0.994936	0.00277299	0.229062	99.4936	0.277299
17NB-4-2Pl25		68.0458	0.0304	18.5864	0.0091	0.006	0.0028	0.0679	11.3607	0.0151	0	0.15	0.0019	98.2761	0.00328903	0.99584	0.000870888	0.328903	99.584	0.0870888
17NB-4-2Pl26		70.0498	0	18.9897	0	0.002	0	0	11.6566	0.0118	0	0.1683	0.0355	100.914	0	0.999334	0.000665613	0	99.9334	0.0665613
17NB-4-2Pl27		69.1012	0	19.1208	0.0164	0	0	0.0093	11.3737	0.057	0	0.139	0.0206	99.838	0.000450163	0.996265	0.0032851	0.0450163	99.6265	0.32851
17NB-4-2Pl28		69.1385	0	18.6993	0	0	0.0126	0.0679	11.7424	0.0285	0	0.1452	0	99.8344	0.00318017	0.995231	0.00158932	0.318017	99.5231	0.158932
17NB-4-2Pl29		69.2731	0	18.9136	0	0.0201	0	0.0725	12.1781	0.0234	0	0.0221	0	100.503	0.00327491	0.995467	0.00125853	0.327491	99.5467	0.125853
17NB-4-2Pl30		69.3058	0	18.8527	0.0019	0.008	0	0.0309	11.4012	0.0335	0	0.1189	0.0187	99.7716	0.00149257	0.996581	0.00192667	0.149257	99.6581	0.192667
17NB-4-3Pl1		70.3437	0	19.4311	0	0.018	0.0194	0.0416	11.0022	0.025	0	0.0807	0	100.962	0.00208196	0.996428	0.00148973	0.208196	99.6428	0.148973
17NB-4-3Pl2		73.4466	0	19.8227	0.0235	0	0	0.0509	5.8943	0.0334	0	0.134	0.0372	99.4426	0.00473176	0.991571	0.00369691	0.473176	99.1571	0.369691
17NB-4-3Pl3		68.1126	0.0061	19.6868	0.1065	0	0.0027	1.1224	10.7776	0.0799	0	0.0911	0	99.9857	0.0541677	0.941241	0.0045912	5.41677	94.1241	0.45912
17NB-4-3Pl4		69.1788	0.0141	19.0686	0	0	0	0.2105	11.48	0.0666	0	0.1142	0	100.133	0.00999326	0.986242	0.00376458	0.999326	98.6242	0.376458
17NB-4-3Pl5		68.2966	0.0282	18.7827	0.074	0.024	0	0.1521	10.5699	0.0834	0	0.2152	0	98.2261	0.00784876	0.987027	0.00512419	0.784876	98.7027	0.512419
17NB-4-3Pl6		69.5314	0	19.4911	0.0126	0	0	0.2226	11.3038	0.1798	0	0.0972	0.0465	100.885	0.0106547	0.979098	0.0102469	1.06547	97.9098	1.02469
17NB-4-3Pl7		64.247	0	21.3762	2.5807	0	0.1124	0.2412	9.3453	2.3413	0	0.0514	0.0222	100.318	0.0120961	0.848102	0.139802	1.20961	84.8102	13.9802
17NB-4-3Kfs1		63.9472	0.0143	17.3542	0.2814	0	0.0259	0.0047	0.3886	16.3389	0	0.1522	0	98.5074	0.000233112	0.0348784	0.964888	0.0233112	3.48784	96.4888
17NB-4-3Kfs2		64.9807	0.0774	17.7573	0.1569	0.038	0	0.0173	0.3481	16.666	0	0.1368	0	100.178	0.000844284	0.0307421	0.968414	0.0844284	3.07421	96.8414
17NB-4-3Kfs3		64.7111	0.0612	17.7479	0.0649	0	0	0.0631	0.4683	16.4614	0	0.2575	0.0296	99.865	0.00307648	0.0413176	0.955606	0.307648	4.13176	95.5606
17NB-4-3Kfs4		65.156	0.0163	17.7432	0.0884	0	0	0	0.7723	15.9364	0	0.1775	0.0056	99.8957	0	0.0686011	0.931399	0	6.86011	93.1399
17NB-4-3Kfs5		65.0117	0	17.6193	0.074	0.0121	0.0052	0.0395	0.5265	16.775	0	0.1558	0	100.219	0.00188404	0.0454442	0.952672	0.188404	4.54442	95.2672
17NB-4-3Kfs6		64.6307	0.0204	18.0982	0.1243	0	0	0	0.245	16.6982	0	0.1275	0	99.9443	0	0.0218131	0.978187	0	2.18131	97.8187
17NB-4-3Kfs7		61.9276	0	16.9414	0.0721	0.042	0	0	0.3299	16.6425	0	0.1015	0	96.057	0	0.0292464	0.970754	0	2.92464	97.0754
17NB-4-3Kfs8		64.9672	0.0408	17.8934	0	0.014	0	0	0.3756	16.9051	0	0.0779	0	100.274	0	0.0326651	0.967335	0	3.26651	96.7335
17NB-4-3Kfs9		64.6073	0.0367	17.4778	0.0126	0.03	0	0	0.3494	16.9012	0	0.1239	0	99.5389	0	0.0304628	0.969537	0	3.04628	96.9537
17NB-4-3Kfs10		64.823	0.0448	17.7258	0.0685	0.008	0	0.0095	0.5882	16.3436	0	0.2328	0	99.8442	0.000462657	0.0518379	0.947699	0.0462657	5.18379	94.7699
17NB-4-3Kfs11		63.3957	0.0245	17.5911	0	0	0.0052	0.0253	0.2794	16.4609	0	0.1246	0.0556	97.9623	0.00125682	0.0251168	0.973626	0.125682	2.51168	97.3626
17NB-4-3Kfs12		65.2055	0.051	17.8045	0.0234	0.008	0	0	0.2314	17.2087	0	0.0873	0.0741	100.694	0	0.0200276	0.979972	0	2.00276	97.9972
17NB-4-3Kfs13		64.8642	0.0368	17.8363	0.0956	0	0	0.0726	0.6874	16.0543	0	0.0594	0.0501	99.7567	0.0035533	0.0608823	0.935564	0.35533	6.08823	93.5564
17NB-4-3Kfs14		64.5973	0.0163	17.0868	0.0126	0	0	0.0189	0.3478	16.3138	0	0.117	0.0185	98.529	0.000941589	0.0313556	0.967703	0.0941589	3.13556	96.7703
17NB-4-3Kfs15		64.3488	0	17.2928	0.0541	0	0.0077	0	0.4281	16.4724	0	0.1665	0	98.7704	0	0.0379982	0.962002	0	3.79982	96.2002
17NB-4-3Kfs16		64.6668	0.0265	17.6499	0.0468	0	0	0.0031	0.5781	16.3276	0	0.1834	0	99.4822	0.000151295	0.0510565	0.948792	0.0151295	5.10565	94.8792
17NB-4-3Kfs17		62.6375	0.0449	16.7218	0.0324	0	0.0065	0.0978	0.6467	15.855	0	0.1659	0	96.2085	0.00485457	0.05809	0.937055	0.485457	5.809	93.7055
17NB-4-3Kfs18		64.9547	0.0347	17.6166	0.0649	0	0	0	0.3557	16.9324	0	0.1759	0.0019	100.137	0	0.0309397	0.96906	0	3.09397	96.906
17NB-4-3Kfs19		64.3656	0.0204	17.863	0.0775	0.0121	0	0	0.5422	16.306	0	0.1202	0	99.307	0	0.0481061	0.951894	0	4.81061	95.1894
17NB-4-3Kfs20		65.1695	0.0245	17.8232	0.0559	0.004	0.0232	0.0126	0.4459	16.6395	0	0.1262	0	100.325	0.000610718	0.0391105	0.960279	0.0610718	3.91105	96.0279
17NB-4-3Kfs21		64.3958	0.0387	17.64	0.0054	0.024	0	0.0426	0.7084	16.24	0	0.1194	0.0296	99.2439	0.00206187	0.0620465	0.935892	0.206187	6.20465	93.5892
17NB-4-3Kfs22		65.4472	0.0245	18.0295	0.0902	0	0	0.0426	0.7145	16.3075	0	0.113	0	100.769	0.00205279	0.0623051	0.935642	0.205279	6.23051	93.5642
17NB-4-3Kfs23		64.8493	0.0183	17.5143	0.027	0.018	0	0	0.3778	16.8048	0	0.1198	0	99.7293	0	0.0330397	0.96696	0	3.30397	96.696
21NB-4-1Pl1	Monzogranite	69.5728	0.0282	18.9014	0	0.012	0.0209	0.0276	11.6742	0.03	0	0.0708	0.0317	100.37	0.00130255	0.997012	0.00168576	0.130255	99.7012	0.168576
21NB-4-1Pl2		69.8718	0.0302	18.843	0	0	0.0279	0.1167	11.9943	0.0733	0	0.1772	0	101.134	0.00532657	0.99069	0.00398352	0.532657	99.069	0.398352
21NB-4-1Pl3		69.3064	0	18.6585	0	0	0.0153	0.0215	11.7414	0.0217	0	0.1246	0.0261	99.9155	0.00100964	0.997777	0.00121332	0.100964	99.7777	0.121332
21NB-4-1Pl4		68.5469	0	18.8624	0.0487	0	0.0112	0.2581	11.4754	0.0983	0	0.2531	0.0261	99.5802	0.0122084	0.982255	0.00553619	1.22084	98.2255	0.553619
21NB-4-1Pl5		69.767	0.0302	18.7832	0.0036	0	0.0139	0.0368	11.6236	0.0367	0	0.0667	0	100.362	0.00174286	0.996188	0.00206951	0.174286	99.6188	0.206951
21NB-4-1Pl6		69.399	0	18.847	0.0325	0	0	0.0123	11.6983	0.02	0	0.1152	0	100.124	0.000580037	0.998297	0.00112297	0.0580037	99.8297	0.112297
21NB-4-1Pl7		69.9774	0	18.7793	0.027	0.014	0	0.0567	12.0837	0.0233	0	0.1628	0	101.124	0.00258299	0.996153	0.00126381	0.258299	99.6153	0.126381
21NB-4-1Pl8		69.1272	0	18.9838	0	0	0.025	0.0599	11.4019	0.0733	0	0.0905	0	99.7616	0.00288255	0.992918	0.00419992	0.288255	99.2918	0.419992
21NB-4-1Pl9		69.5218	0	19.03	0.0163	0.022	0.0195	0.1074	12.0219	0.0417	0	0.1572	0	100.938	0.00490141	0.992833	0.00226589	0.490141	99.2833	0.226589
21NB-4-1Pl10		69.3152	0	18.7107	0.009	0	0	0.0738	11.6592	0.04	0	0.1864	0	99.9943	0.00347783	0.994278	0.0022444	0.347783	99.4278	0.22444
21NB-4-1Pl11		70.054	0	19.0767	0	0.022	0.0014	0.0384	12.1314	0.0516	0	0.078	0.0242	101.478	0.00174126	0.995473	0.00278592	0.174126	99.5473	0.278592
21NB-4-1Pl12		69.5329	0.0121	18.923	0.0054	0.0579	0.0195	0.0184	12.1	0.0233	0	0.1179	0	100.81	0.000838555	0.997897	0.00126432	0.0838555	99.7897	0.126432
21NB-4-1Pl13		69.6134	0.0021	18.8521	0	0.02	0.0083	0.0461	11.692	0.05	0	0.1516	0	100.436	0.00216802	0.995032	0.00279975	0.216802	99.5032	0.279975
21NB-4-1Pl14		69.1503	0.0443	18.8562	0	0	0.0181	0.1337	11.9914	0.0583	0	0.1041	0.0279	100.384	0.0061042	0.990727	0.00316923	0.61042	99.0727	0.316923
21NB-4-1Pl15		69.4164	0	18.7915	0	0	0	0.109	11.8844	0.045	0	0.0829	0	100.329	0.00503028	0.992497	0.00247266	0.503028	99.2497	0.247266
21NB-4-1Pl16		68.8348	0	18.8437	0	0	0.007	0.0583	11.9258	0	0	0.0885	0	99.7581	0.00269416	0.997306	0	0.269416	99.7306	0
21NB-4-1Pl17		69.4882	0	18.9017	0.0361	0	0.0083	0.0568	11.6961	0.0417	0	0.0945	0.0205	100.344	0.00267019	0.994996	0.00233409	0.267019	99.4996	0.233409
21NB-4-1Pl18		68.9826	0	19.0717	0.0667	0.012	0	0.1781	11.2408	0.025	0	0.0995	0	99.6764	0.00866692	0.989885	0.00144853	0.866692	98.9885	0.144853
21NB-4-1Pl19		69.6576	0	18.8997	0	0	0.0083	0.1598	11.5652	0.0851	0	0.0907	0	100.466	0.0075414	0.987677	0.00478181	0.75414	98.7677	0.478181
21NB-4-1Pl20		68.4435	0.0181	18.952	0.0126	0.01	0.0168	0.132	11.7764	0.0616	0	0.1538	0.0316	99.6084	0.00613494	0.990456	0.00340882	0.613494	99.0456	0.340882
21NB-4-1Pl21		68.0635	0	18.3999	0.009	0.04	0	0.1366	11.5248	0.0117	0	0.0879	0	98.2734	0.00650291	0.992834	0.000663177	0.650291	99.2834	0.0663177
21NB-4-1Pl22		69.7027	0	18.9117	0	0.014	0.0237	0.1166	11.9415	0.0117	0	0.11	0	100.832	0.00536337	0.993996	0.000640785	0.536337	99.3996	0.0640785
21NB-4-1Pl23		69.3964	0	18.5	0.0253	0.004	0	0.1152	11.6784	0.0183	0	0.1644	0	99.902	0.00541597	0.99356	0.00102438	0.541597	99.356	0.102438
21NB-4-1Pl24		67.7241	0	20.1182	0.1263	0.05	0.0319	0.3889	10.9842	0.7157	0	0.1546	0.0483	100.342	0.0184154	0.941233	0.0403516	1.84154	94.1233	4.03516
21NB-4-1Pl25		68.9711	0	19.1757	0.0469	0	0	0.1721	11.5231	0.1717	0	0.1545	0.0205	100.236	0.00810686	0.982263	0.00963007	0.810686	98.2263	0.963007
21NB-4-1Pl26		68.7799	0	18.9592	0.0109	0.0221	0	0.0185	11.6752	0.0318	0	0.111	0	99.6086	0.000873301	0.997339	0.00178734	0.0873301	99.7339	0.178734
21NB-4-1Pl27		69.7033	0.0221	18.9328	0	0.042	0	0.0416	12.1374	0.0718	0	0.1105	0.0447	101.106	0.00188311	0.994247	0.00386985	0.188311	99.4247	0.386985
21NB-4-1Pl28		67.3599	0.0866	18.5998	0.1337	0.0221	0.0307	0.2599	11.4857	0.1418	0	0.1209	0.0596	98.3007	0.0122517	0.979789	0.00795888	1.22517	97.9789	0.795888
21NB-4-1Pl29		68.9503	0.0161	18.914	0.0199	0.026	0	0.2214	11.3208	0.1151	0	0.1673	0.0484	99.7993	0.0106214	0.982804	0.00657455	1.06214	98.2804	0.657455
21NB-4-1Pl30		69.0712	0	18.5662	0.0108	0.0399	0.0014	0.0645	12.0317	0.0067	0	0.0968	0	99.8892	0.00295259	0.996682	0.000365178	0.295259	99.6682	0.0365178
21NB-4-1Pl31		69.4758	0	19.1185	0.0613	0	0.0389	0.4364	11.4453	0.0583	0	0.1625	0.0205	100.818	0.020568	0.97616	0.00327162	2.0568	97.616	0.327162
21NB-4-1Pl32		69.2101	0	18.8893	0	0	0	0.0646	11.7537	0.0501	0	0.1102	0.0354	100.113	0.00301955	0.994192	0.00278827	0.301955	99.4192	0.278827
21NB-4-1Pl33		69.7185	0.0446	18.874	0.0272	0	0.0113	0.0588	12.1035	0.0269	0	0.0704	0.0319	100.967	0.00267352	0.99587	0.00145628	0.267352	99.587	0.145628
21NB-4-1Pl34		69.2578	0.004	19.1442	0	0.0342	0	0.1455	11.6175	0.0823	0	0.0644	0	100.35	0.00684168	0.988551	0.00460773	0.684168	98.8551	0.460773
21NB-4-1Pl35		69.7231	0	19.3946	0.0055	0	0.0014	0.0913	11.5338	0.0739	0	0.0347	0.0206	100.879	0.00433708	0.991483	0.00417982	0.433708	99.1483	0.417982
21NB-4-1Pl36		69.5363	0	18.4408	0.0234	0	0.032	0.0492	11.5884	0.1918	0	0.1941	0	100.056	0.0023155	0.986937	0.0107477	0.23155	98.6937	1.07477
21NB-4-1Pl37		69.5029	0	18.6848	0.0325	0	0	0.0477	11.6926	0.0083	0	0.1491	0	100.118	0.00224823	0.997286	0.000465787	0.224823	99.7286	0.0465787
21NB-4-1Pl38		69.7404	0	19.006	0.0469	0.034	0	0.0615	11.6827	0.0133	0	0.1144	0	100.699	0.00289841	0.996355	0.000746317	0.289841	99.6355	0.0746317
21NB-4-1Pl39		69.1983	0	18.8919	0	0	0.007	0.0231	11.8475	0.0652	0	0.0824	0	100.115	0.00107242	0.995324	0.00360401	0.107242	99.5324	0.360401
21NB-4-1Pl40		69.9261	0	18.9161	0	0.0381	0.0182	0.0833	12.1048	0.0585	0	0.1465	0	101.292	0.00377641	0.993066	0.00315774	0.377641	99.3066	0.315774
21NB-4-1Pl41		69.0636	0	18.7351	0.0615	0.0121	0.021	0.0077	11.9842	0.0251	0	0.1289	0.013	100.052	0.00035444	0.99827	0.00137567	0.035444	99.827	0.137567
21NB-4-1Pl42		69.3151	0	19.0874	0.0326	0	0.007	0.3746	11.6313	0.0284	0	0.185	0.0336	100.695	0.0174585	0.980966	0.00157596	1.74585	98.0966	0.157596
21NB-4-1Pl43		69.1189	0	18.8231	0.0508	0	0.0182	0.0786	12.0878	0.0151	0	0.0786	0	100.271	0.00357747	0.995604	0.000818309	0.357747	99.5604	0.0818309
21NB-4-1Pl44		69.6432	0	19.0858	0.0019	0.0021	0.0322	0.0958	11.7164	0.0587	0	0.1012	0	100.737	0.00448337	0.992246	0.00327087	0.448337	99.2246	0.327087
21NB-4-1Pl45		69.9737	0	18.9767	0.0454	0.0121	0.0042	0.0108	12.0851	0.052	0	0.0661	0	101.226	0.000492204	0.996686	0.00282171	0.0492204	99.6686	0.282171
21NB-4-1Pl46		69.677	0.0101	18.8225	0	0.0221	0.0211	0.0309	11.952	0.0302	0	0.0445	0	100.61	0.00142427	0.996918	0.0016574	0.142427	99.6918	0.16574
21NB-4-1Pl47		68.9869	0	18.8492	0.0127	0.0262	0.0056	0.1639	11.9194	0.0755	0	0.0944	0	100.134	0.00751031	0.98837	0.0041192	0.751031	98.837	0.41192
21NB-4-1Pl48		68.7422	0	19.1718	0.4375	0	0.0014	0.8971	11.1411	0.0468	0	0.1492	0	100.587	0.0424885	0.954872	0.00263915	4.24885	95.4872	0.263915
21NB-4-1Pl49		66.8803	0	20.3229	0.129	0	0.0652	0.0975	10.2947	0.9317	0	0.049	0	98.7703	0.00491523	0.93916	0.0559246	0.491523	93.916	5.59246
21NB-4-1Pl50		69.9104	0.004	18.8176	0.0218	0.0181	0.0098	0.0232	12.1153	0.0118	0	0.0928	0	101.025	0.0010564	0.998304	0.000639751	0.10564	99.8304	0.0639751
21NB-4-1Pl51		69.5261	0.0425	19.1424	0.0036	0.0241	0	0.0649	12.1269	0.0771	0	0.1351	0.043	101.186	0.00293642	0.99291	0.00415351	0.293642	99.291	0.415351
Pl—Plagioclase; Kfs—K-feldspar; An—Anorthite; Ab—Albite; Or—Orthoclase

## Sheet: Hornblende data
Supplementary Data S3 Representative electron probe analyses of hornblende from the Neoproterozoic Nanba intrusive complex of the western Yangtze Block, South China
Sample	Lithology	SiO2	TiO2	Al2O3	Cr2O3	TFeO	MnO	MgO	CaO	Na2O	K2O	NiO	Total	Si	AlⅣ	Tsite	AlⅥ	Ti	Cr3+	Fe3+	Mg	Fe2+	Mn2+	Csite	Fe2+	Ca	Na	Bsite	Na	K	Asite	Mg/(Mg+Fe2+)	Mg#	P (Kbar)	P_uncerainty	P (MPa)	P_uncerainty	T (℃)	T_uncerainty	Depth (km)	△NNO	logfO2	H2O (wt.%)
21NB-3Hbl1	Cumulate gabbro	47.5461	0.7989	8.7124	0	13.2503	0.5367	13.6859	11.1824	1.0231	0.2396	0	96.9754	6.84092	1.15908	8	0.318301	0.08644	0	0.890864	2.93551	0.703479	0.065406	5	0	1.72383	0.276175	2	0.00923059	0.0439792	0.0532098	0.806683	80.6683	3	0.85	300	85	825	25	12.9992	1.44735	-11.8112	7.55578
21NB-3Hbl3		46.6074	0.7022	9.967	0.0622	13.731	0.5759	12.8122	10.9087	1.1531	0.2905	0	96.8102	6.732	1.268	8	0.428719	0.0762734	0.00710319	0.926794	2.75882	0.73183	0.0704568	5	0	1.68819	0.311811	2	0.0111135	0.0535299	0.0646434	0.790346	79.0346	3.7	0.7	370	70	834	25	15.2065	1.1794	-11.8701	8.46958
21NB-3Hbl4		46.6247	0.6036	9.8814	0.0295	13.6795	0.536	13.1143	11.3161	1.1175	0.3035	0	97.2061	6.72032	1.27968	8	0.398924	0.0654254	0.00336178	0.883338	2.81793	0.765585	0.0654372	5	0	1.74755	0.252451	2	0.059845	0.0558077	0.115653	0.786359	78.6359	3.7	0.6	370	60	842	29	15.2065	1.25383	-11.6383	8.25182
21NB-3Hbl5		47.4117	0.713	8.6532	0.0558	12.95	0.5097	13.2544	10.9749	1.0002	0.2789	0.0418	95.8436	6.9089	1.0911	8	0.395025	0.0781333	0.00642881	0.771954	2.87935	0.8062	0.0629106	5	0	1.71349	0.282589	1.99608	0	0.0518481	0.0518481	0.781254	78.1254	3.3	0.75	330	75	811	35	13.9454	1.34728	-12.1846	7.81632
21NB-3Hbl6		46.6387	0.6029	9.278	0	13.4958	0.5776	13.1348	11.0206	1.0607	0.244	0	96.0531	6.78317	1.21683	8	0.373532	0.0659409	0	0.932406	2.84787	0.709095	0.071154	5	0	1.71732	0.282684	2	0.0164205	0.0452728	0.0616933	0.800646	80.0646	3.5	0.6	350	60	834	22	14.576	1.35005	-11.7077	8.10987
21NB-3Hbl7		47.0916	0.6278	9.3062	0.041	13.088	0.5457	13.1714	10.5836	1.1119	0.246	0	95.8132	6.83194	1.16806	8	0.423147	0.0684928	0.00470281	0.954737	2.84868	0.633188	0.0670564	5	0	1.6451	0.312759	1.95786	0	0.0455299	0.0455299	0.818147	81.8147	3.3	0.8	330	80	825	26	13.9454	1.34286	-11.9031	8.12431
21NB-3Hbl8		46.8889	0.5407	11.6971	0	13.7488	0.5257	12.1109	11.2126	1.1757	0.2691	0.0323	98.2018	6.69259	1.30741	8	0.660286	0.0580368	0	0.727276	2.57698	0.913863	0.0635548	5	0	1.7147	0.285295	2	0.0400653	0.0490003	0.0890657	0.738212	73.8212	3.6	1.75	360	175	825	25	14.8913	0.821244	-12.4122	10.2148
21NB-3Hbl9		46.8997	0.608	9.1342	0	13.5476	0.4969	13.0706	11.3683	1.0773	0.2011	0.0133	96.417	6.82307	1.17693	8	0.389225	0.0665175	0	0.769475	2.83476	0.878795	0.0612301	5	0	1.772	0.228	2	0.0758723	0.0373235	0.113196	0.763355	76.3355	3.5	0.6	350	60	844	27	14.576	1.25873	-11.6027	8.18757
21NB-3Hbl10		46.5363	0.7533	9.9708	0	13.9405	0.5684	12.5102	11.1316	0.9939	0.3035	0	96.7085	6.74863	1.25137	8	0.452788	0.0821514	0	0.839516	2.70457	0.851153	0.0698175	5	0	1.72958	0.270422	2	0.00903253	0.0561492	0.0651817	0.760625	76.0625	3.7	0.75	370	75	833	27	15.2065	1.07051	-11.9988	8.73685
21NB-3Hbl11		46.3709	0.5098	10.2128	0	14.1027	0.5237	12.5667	11.3295	1.0426	0.2672	0	96.9259	6.71575	1.28425	8	0.458961	0.0555229	0	0.856114	2.7132	0.851965	0.0642418	5	0	1.758	0.242001	2	0.0507585	0.0493681	0.100127	0.761031	76.1031	3.7	0.85	370	85	838	33.5	15.2065	1.11406	-11.8565	8.91372
21NB-3Hbl12		47.0378	0.7641	8.8979	0	13.3643	0.689	13.2603	11.1759	0.9263	0.2161	0	96.3317	6.82261	1.17739	8	0.343663	0.0833444	0	0.893004	2.86726	0.72808	0.0846464	5	0	1.73678	0.260495	1.99727	0	0.039987	0.039987	0.797493	79.7493	3.3	0.95	330	95	831	26.5	13.9454	1.35186	-11.7739	8.00765
21NB-3Hbl13		46.8103	0.6654	9.6556	0	13.3898	0.5987	12.8591	11.3827	1.0488	0.2621	0	96.6725	6.79431	1.20569	8	0.446031	0.0726289	0	0.730444	2.78243	0.894858	0.0736036	5	0	1.77014	0.22986	2	0.0652883	0.0485324	0.113821	0.756653	75.6653	3.7	0.5	370	50	844	30.5	15.2065	1.14226	-11.7109	8.54903
21NB-3Hbl15		46.8664	0.6016	9.2706	0	13.2086	0.5454	13.0573	11.2895	0.9687	0.2899	0.019	96.117	6.82889	1.17111	8	0.420924	0.0659203	0	0.765844	2.8363	0.843696	0.0673116	5	9.99201e-16	1.76247	0.237529	2	0.0361381	0.0538887	0.0900269	0.770735	77.0735	3.6	0.5	360	50	844	28.5	14.8913	1.27238	-11.5849	8.2481
21NB-3Hbl16		47.37	0.6329	8.7656	0	13.353	0.5643	13.2785	11.4481	0.9522	0.2374	0	96.602	6.87158	1.12842	8	0.370195	0.0690417	0	0.749829	2.87153	0.870072	0.0693345	5	0	1.77928	0.220716	2	0.0470935	0.0439334	0.0910269	0.76746	76.746	3.3	0.85	330	85	828	33.5	13.9454	1.32761	-11.8581	7.95394
21NB-3Hbl17		47.4945	0.6386	9.1485	0	13.6912	0.4725	13.3366	11.1103	0.9846	0.3299	0.0057	97.2124	6.82327	1.17673	8	0.372276	0.0689924	0	0.911459	2.85631	0.733469	0.0574959	5	0	1.71015	0.274254	1.9844	0	0.0604634	0.0604634	0.795678	79.5678	3.5	0.55	350	55	838	23	14.576	1.36787	-11.6109	7.80864
21NB-3Hbl18		45.0743	0.4285	11.2282	0	15.6932	0.3981	11.1987	11.6709	1.1287	0.3714	0	97.192	6.59978	1.40022	8	0.537386	0.0471818	0	0.716882	2.44444	1.20474	0.0493718	5	0	1.83089	0.169105	2	0.151318	0.0693751	0.220693	0.669859	66.9859	4	1.6	400	160	831	37.5	16.152	0.635435	-12.4611	9.6243
21NB-2Hbl1	Hornblende Gabbro	46.3457	1.6092	8.7053	0.0706	13.0831	0.3736	13.4831	11.4063	0.9391	0.4646	0	96.4806	6.7522	1.2478	8	0.246967	0.176307	0.0081323	0.727489	2.92844	0.866564	0.0461029	5	0	1.78049	0.219512	2	0.0457603	0.0863527	0.132113	0.771657	77.1657	2.7	0.7	270	70	858	12.5	12.0528	1.1928	-11.4321	6.69612
21NB-2Hbl2		46.1485	1.7177	9.1554	0.1476	13.4243	0.3068	13.0351	11.2547	1.0862	0.5101	0.0228	96.8092	6.72071	1.27929	8	0.292117	0.188117	0.0169948	0.680273	2.82997	0.95468	0.0378442	5	0	1.7561	0.243897	2	0.062801	0.0947706	0.157572	0.74775	74.775	2.7	0.7	270	70	850	10.5	12.0528	0.990803	-11.7873	6.8872
21NB-2Hbl3		46.6211	1.2312	9.0392	0.0934	13.177	0.3772	13.2451	11.1127	0.9812	0.4152	0	96.2933	6.78248	1.21752	8	0.332334	0.134697	0.010743	0.786937	2.87258	0.81623	0.0464797	5	0	1.73214	0.267855	2	0.00890768	0.0770592	0.0859669	0.778728	77.8728	3	0.55	300	55	850	9.5	12.9992	1.21945	-11.5463	7.34732
21NB-2Hbl4		46.3815	1.3359	8.5183	0.0245	13.4337	0.4313	13.132	11.0849	0.9154	0.4299	0.0114	95.6988	6.80377	1.19623	8	0.276459	0.147367	0.00284148	0.797021	2.87175	0.850976	0.0535883	5	0	1.74219	0.257812	2	0.00253893	0.0804513	0.0829902	0.77141	77.141	3	0.4	300	40	850	10.5	12.9992	1.22085	-11.5449	6.97052
21NB-2Hbl5		48.9224	0.5034	6.9837	0.1283	12.4551	0.3878	14.5299	11.7073	0.7941	0.1915	0	96.6035	7.06355	0.936448	8	0.251933	0.0546577	0.0146459	0.68088	3.12744	0.82302	0.0474252	5	0	1.81105	0.188949	2	0.0333489	0.0352732	0.0686221	0.791665	79.1665	2.4	1	240	100	788	48	11.1061	1.77121	-12.2858	6.71758
21NB-2Hbl6		47.2122	1.1975	8.4608	0.0263	12.7864	0.4056	14.0618	11.3835	0.8697	0.2621	0	96.6659	6.81161	1.18839	8	0.250286	0.129925	0.00300002	0.864395	3.02446	0.678371	0.0495655	5	0	1.75967	0.240334	2	0.00294728	0.0482418	0.0511891	0.816796	81.6796	2.8	0.65	280	65	850	23.5	12.3683	1.49343	-11.2805	7.10744
21NB-2Hbl7		45.873	1.6085	8.9275	0.0445	13.0757	0.2907	13.2707	11.0111	1.0614	0.5534	0.0019	95.7184	6.73047	1.26953	8	0.274211	0.177473	0.00516204	0.767843	2.90264	0.836546	0.036126	5	0	1.73092	0.269077	2	0.0328571	0.103583	0.13644	0.776276	77.6276	3	1.05	300	105	850	15.5	12.9992	1.16149	-11.6043	6.56795
21NB-2Hbl8		46.1982	1.79	8.4561	0	12.975	0.291	13.3747	11.5348	0.9656	0.5979	0.0344	96.2177	6.78263	1.21737	8	0.245807	0.197628	0	0.560592	2.9273	1.03248	0.0361869	5	0	1.81444	0.185565	2	0.0892972	0.111986	0.201283	0.739258	73.9258	3.5	1.3	350	130	862	15.5	14.576	1.08461	-11.4322	6.18023
21NB-2Hbl9		45.2196	1.6417	9.7549	0.033	13.5787	0.2946	12.5932	11.5203	1.0133	0.5212	0.0058	96.1763	6.65326	1.34674	8	0.344814	0.181645	0.0038388	0.615784	2.7622	1.05501	0.0367136	5	0	1.81606	0.18394	2	0.105122	0.0978303	0.202952	0.723618	72.3618	3	0.9	300	90	860	14	12.9992	0.846658	-11.7282	7.46151
21NB-2Hbl10		48.2319	0.6746	8.4948	0.0083	13.3061	0.386	13.9013	11.3469	0.9888	0.2227	0.0746	97.636	6.89514	1.10486	8	0.326389	0.0725233	0.000938123	0.841849	2.96261	0.748951	0.0467393	5	0	1.73798	0.262022	2	0.0120478	0.0406153	0.0526631	0.798211	79.8211	2.9	0.9	290	90	812	32.5	12.6838	1.51194	-12.0162	7.5055
21NB-2Hbl11		45.2692	1.4634	9.7966	0.1138	13.3547	0.4118	12.6792	11.6608	1.168	0.4567	0.0058	96.38	6.65538	1.34462	8	0.352848	0.161792	0.0132277	0.562804	2.7789	1.07915	0.0512794	5	0	1.83678	0.163219	2	0.169714	0.0856569	0.255371	0.720286	72.0286	3.1	0.75	310	75	867	15.5	13.3146	0.850548	-11.5886	7.5528
21NB-2Hbl12		46.2908	1.2788	8.8809	0.0413	13.1441	0.3251	13.3553	11.1879	0.9178	0.4392	0	95.8612	6.76696	1.23304	8	0.297031	0.14058	0.00477334	0.803453	2.91047	0.803437	0.0402534	5	1.44329e-15	1.75229	0.247709	2	0.0124216	0.0819073	0.0943289	0.783668	78.3668	3	0.5	300	50	850	14.5	12.9992	1.27321	-11.4926	7.09623
21NB-2Hbl13		46.311	1.443	8.9348	0.1106	13.083	0.3918	13.3396	11.2986	1.0021	0.2885	0.0134	96.2164	6.75139	1.24861	8	0.286535	0.158197	0.0127479	0.766454	2.8991	0.82859	0.0483793	5	0	1.76479	0.235213	2	0.0480338	0.0536557	0.10169	0.77772	77.772	3	0.7	300	70	850	17	12.9992	1.18653	-11.5792	7.38195
21NB-2Hbl14		45.9126	1.4148	8.8065	0.1222	13.3152	0.3637	13.3531	11.2687	1.0674	0.4958	0	96.12	6.72129	1.27871	8	0.240708	0.155754	0.0141438	0.781849	2.91416	0.848289	0.0450972	5	0	1.76747	0.232527	2	0.0704379	0.0925951	0.163033	0.774538	77.4538	3	0.6	300	60	850	16	12.9992	1.21291	-11.5529	6.57402
21NB-2Hbl15		46.9456	0.5582	8.5178	0.081	12.962	0.3194	13.5155	11.6716	0.9648	0.2672	0	95.8031	6.8783	1.1217	8	0.349154	0.0615034	0.00938306	0.651714	2.95209	0.936521	0.0396376	5	0	1.83221	0.167789	2	0.106285	0.0499441	0.156229	0.759163	75.9163	3.5	0.7	350	70	850	37.5	14.576	1.40726	-11.338	7.56405
21NB-2Hbl16		46.7688	1.5086	8.4739	0.0694	13.0026	0.3617	13.6133	11.2869	0.8468	0.4842	0.0918	96.508	6.79933	1.20067	8	0.251262	0.164933	0.00797705	0.766881	2.95042	0.813988	0.0445394	5	0	1.7581	0.23869	1.99679	0	0.0898039	0.0898039	0.783767	78.3767	3	0.7	300	70	850	12.5	12.9992	1.29102	-11.4748	6.63037
21NB-2Hbl17		47.062	0.8655	8.921	0.0132	13.4847	0.4404	13.4275	11.4306	0.8686	0.3053	0.0248	96.8436	6.80505	1.19495	8	0.325346	0.0941132	0.00150906	0.838286	2.89445	0.792355	0.0539379	5	0	1.77088	0.229123	2	0.0143912	0.0563182	0.0707094	0.785084	78.5084	3.3	0.6	330	60	850	21.5	13.9454	1.35572	-11.3978	7.68005
21NB-2Hbl18		46.4469	0.7283	8.8936	0.0429	13.4278	0.4182	13.2494	11.2939	1.0036	0.2838	0.0038	95.7922	6.79616	1.20384	8	0.329851	0.0801383	0.00496292	0.829954	2.8901	0.81316	0.0518295	5	0	1.77055	0.229446	2	0.0552696	0.0529761	0.108246	0.780421	78.0421	3.5	0.55	350	55	850	25	14.576	1.34971	-11.3956	7.65622
21NB-2Hbl19		47.9289	0.5813	7.7886	0.0132	12.6216	0.4246	14.1377	11.2145	0.8992	0.271	0.0154	95.896	6.9581	1.0419	8	0.290717	0.0634624	0.0015151	0.830774	3.05972	0.701596	0.0522106	5	0	1.74434	0.253101	1.99744	0	0.0501907	0.0501907	0.813471	81.3471	3	0.85	300	85	792	26	12.9992	1.68676	-12.2581	6.97472
21NB-2Hbl20		44.8382	1.6119	10.0809	0.1533	13.7421	0.4098	12.4025	10.98	1.0017	0.6741	0.0077	95.9022	6.59525	1.40475	8	0.342824	0.178297	0.0178278	0.814568	2.71959	0.875843	0.0510553	5	0	1.73039	0.269611	2	0.0160589	0.126493	0.142552	0.756401	75.6401	4	1.35	400	135	850	21	16.152	0.883563	-11.8413	7.31793
21NB-2Hbl21		45.7475	1.3825	9.8827	0.0891	13.7555	0.3555	12.8999	11.0339	0.9907	0.3402	0.0344	96.5119	6.64188	1.35812	8	0.332924	0.150943	0.0102276	0.938449	2.79204	0.731705	0.0437169	5	0	1.71637	0.278875	1.99525	0	0.0630114	0.0630114	0.79235	79.235	3	0.55	300	55	850	12.5	12.9992	1.09839	-11.6674	7.9435
21NB-2Hbl22		46.1645	1.2086	9.5127	0.0033	13.4822	0.3576	12.8252	11.0699	1.0881	0.4695	0.0154	96.197	6.74429	1.25571	8	0.382187	0.13278	0.000381167	0.746415	2.79321	0.90078	0.0442498	5	1.66533e-15	1.73273	0.267272	2	0.040934	0.0875034	0.128437	0.75615	75.615	3	0.6	300	60	844	12.5	12.9992	1.06514	-11.8169	7.57953
21NB-2Hbl23		47.5269	0.6808	8.289	0	13.3017	0.4185	13.503	10.8618	0.8929	0.3243	0	95.7989	6.9098	1.0902	8	0.33011	0.0744335	0	0.915486	2.92662	0.70181	0.0515356	5	0	1.69195	0.251694	1.94364	0	0.0601498	0.0601498	0.806581	80.6581	3	0.8	300	80	800	36.5	12.9992	1.47591	-12.2987	7.22685
21NB-2Hbl24		47.609	1.0041	8.1698	0.0364	13.1533	0.3742	13.8362	11.3455	0.8233	0.2459	0.0288	96.6265	6.87953	1.12047	8	0.270876	0.109111	0.00415857	0.838195	2.98055	0.751305	0.0457994	5	0	1.75651	0.23066	1.98717	0	0.0453304	0.0453304	0.798678	79.8678	2.8	0.75	280	75	829	28	12.3683	1.47878	-11.7078	7.19624
21NB-2Hbl25		44.8455	1.8444	9.6788	0.0379	13.7768	0.3734	12.3425	10.856	1.0215	0.7353	0.0325	95.5446	6.63191	1.36809	8	0.318831	0.205115	0.00443131	0.762837	2.72103	0.940984	0.0467713	5	0	1.72008	0.279923	2	0.0129654	0.138722	0.151687	0.743042	74.3042	3.7	1.1	370	110	850	22.5	15.2065	0.83298	-11.9041	6.84431
21NB-5Hbl1	Gabbro-diorite	45.193	1.5	9.3051	0.031	15.2063	0.355	11.508	11.2655	1.128	0.8026	0.0076	96.3021	6.7155	1.2845	8	0.345105	0.167618	0.00364202	0.536266	2.54928	1.35341	0.0446808	5	0	1.79356	0.206439	2	0.118544	0.152148	0.270692	0.653211	65.3211	4	1.25	400	125	850	25	16.152	0.569981	-12.1548	6.77489
21NB-5Hbl2		44.196	1.2465	9.2417	0.2974	14.9987	0.2928	11.1607	11.7635	1.0875	0.7228	0	95.0076	6.70498	1.29502	8	0.3574	0.14221	0.0356721	0.333568	2.52416	1.56937	0.0376246	5	0	1.9121	0.0879049	2	0.231976	0.139892	0.371868	0.616622	61.6622	4.3	1.35	430	135	850	28	17.0972	0.464728	-12.2478	7.12265
21NB-5Hbl3		49.0443	0.8127	6.7426	0.0411	13.5573	0.4004	13.4731	12.0444	0.8322	0.416	0.0286	97.3927	7.13198	0.868025	8	0.287564	0.0888739	0.00472538	0.333035	2.92078	1.3157	0.0493175	5	0	1.87657	0.123429	2	0.111206	0.0771748	0.188381	0.689436	68.9436	2.8	1	280	100	788	63	12.3683	1.28361	-12.7561	6.36126
21NB-5Hbl4		46.4865	0.6188	8.3001	0	14.3749	0.237	12.4	11.893	1.0985	0.3709	0.0514	95.8311	6.91115	1.08885	8	0.365478	0.0691826	0	0.409201	2.74825	1.37805	0.0298441	5	0	1.89441	0.105592	2	0.21105	0.0703463	0.281396	0.666033	66.6033	3.3	0.7	330	70	839	37.5	13.9454	0.997458	-11.97	7.38674
21NB-5Hbl5		44.8954	1.5946	9.2889	0.0753	14.5577	0.3351	11.7949	11.4664	1.2309	0.8519	0	96.0911	6.69747	1.30253	8	0.330621	0.178889	0.00888131	0.421681	2.62309	1.39449	0.0423418	5	0	1.83271	0.167288	2	0.188733	0.162128	0.350861	0.652903	65.2903	4.2	1.25	420	125	858	25	16.7822	0.573028	-11.9909	6.37461
21NB-5Hbl6		45.2565	1.5184	8.8146	0.3092	14.6324	0.3792	12.3386	11.0677	1.1911	0.7701	0	96.2778	6.68687	1.31313	8	0.221839	0.168714	0.0361206	0.727169	2.71781	1.08089	0.0474566	5	0	1.7521	0.247904	2	0.093316	0.145161	0.238477	0.715457	71.5457	4.3	1.25	430	125	842	22	17.0972	0.888673	-11.9787	5.96776
21NB-5Hbl7		45.766	1.1317	8.7262	0.0049	14.9668	0.3712	11.9001	11.4368	0.9846	0.744	0	96.0323	6.80134	1.19866	8	0.329716	0.126475	0.000575732	0.548633	2.63641	1.31147	0.0467246	5	0	1.82102	0.178981	2	0.104716	0.141054	0.24577	0.667804	66.7804	4.5	1.5	450	150	861	25	17.7272	0.809373	-11.6857	6.70887
21NB-5Hbl8		44.7429	1.6232	8.885	0.0523	15.1434	0.4313	11.3892	11.0236	1.2757	0.755	0	95.3216	6.72555	1.27445	8	0.299594	0.183484	0.00621554	0.534383	2.55216	1.36925	0.0549123	5	0	1.77536	0.224642	2	0.147147	0.144781	0.291928	0.650827	65.0827	4	1	400	100	856	25	16.152	0.534669	-12.0754	6.41786
21NB-5Hbl9		45.5983	1.7291	8.8192	0	14.6276	0.4036	12.0794	11.2749	1.0678	0.7918	0	96.3917	6.7457	1.2543	8	0.283362	0.192363	0	0.556302	2.664	1.2534	0.0505726	5	0	1.7871	0.212898	2	0.0933776	0.149436	0.242813	0.680043	68.0043	4	1	400	100	859	19	16.152	0.715446	-11.8377	6.26181
21NB-5Hbl10		44.9652	1.7057	9.0121	0.0032	14.3305	0.3612	11.8833	11.2923	1.1984	0.8814	0	95.6333	6.72842	1.27158	8	0.317757	0.191938	0.000378582	0.432811	2.65084	1.36049	0.0457794	5	0	1.81041	0.189589	2	0.158094	0.168256	0.326349	0.660838	66.0838	4	1.25	400	125	862	19	16.152	0.612455	-11.8841	6.11706
21NB-5Hbl11		45.721	1.743	9.019	0.0672	14.4138	0.2709	12.1817	11.2749	1.2528	0.8621	0	96.8064	6.74213	1.25787	8	0.309582	0.193287	0.00783473	0.470787	2.67793	1.30674	0.0338358	5	0	1.78136	0.218636	2	0.139549	0.162181	0.30173	0.672059	67.2059	4	1.1	400	110	844	22	16.152	0.6735	-12.1673	6.03065
21NB-5Hbl12		45.0529	1.3826	8.5688	0	15.6631	0.3525	11.83	11.2683	1.121	0.9445	0	96.1837	6.71469	1.28531	8	0.219837	0.154961	0	0.653294	2.62844	1.29896	0.0444988	5	0	1.79937	0.20063	2	0.123301	0.179583	0.302885	0.669257	66.9257	3.8	1.25	380	125	862	24.5	15.5217	0.775976	-11.7286	5.58855
21NB-5Hbl13		45.2554	1.6699	8.6523	0.0376	15.0993	0.3583	12.2824	11.0946	1.346	0.9473	0.0057	96.7488	6.68703	1.31297	8	0.193805	0.185556	0.00439262	0.6666	2.70556	1.19925	0.0448431	5	0	1.75644	0.243561	2	0.142052	0.178571	0.320623	0.692879	69.2879	3.7	1	370	100	850	25	15.2065	0.804983	-11.9321	5.16741
21NB-5Hbl14		45.7516	1.554	8.2696	0	15.3454	0.3346	12.0426	11.1095	1.1304	0.9286	0.0626	96.5289	6.77911	1.22089	8	0.223235	0.173157	0	0.623709	2.6601	1.27781	0.0419931	5	0	1.76368	0.236322	2	0.0884234	0.175532	0.263955	0.67551	67.551	3.7	1	370	100	850	22.5	15.2065	0.801069	-11.936	5.43408
21NB-5Hbl15		45.6847	1.4611	8.4915	0.0619	15.6556	0.3342	12.1559	11.0524	1.1815	0.9621	0	97.0409	6.72309	1.27691	8	0.195867	0.161697	0.00720215	0.747386	2.66683	1.17936	0.0416572	5	0	1.74266	0.257338	2	0.0797758	0.180626	0.260401	0.69337	69.337	3.7	1	370	100	838	17.5	15.2065	0.870926	-12.0996	5.31524
21NB-5Hbl16		45.7285	1.5083	8.4567	0	15.7294	0.3222	12.3558	11.0391	1.4316	0.9277	0	97.4993	6.70382	1.29618	8	0.164952	0.166282	0	0.750427	2.70033	1.178	0.040008	5	0	1.73391	0.266087	2	0.140826	0.173502	0.314327	0.696261	69.6261	3.2	1	320	100	838	19	13.63	0.87763	-12.1136	4.98132
21NB-5Hbl17		46.1025	1.342	8.3159	0.0376	14.7558	0.2989	12.6136	11.2453	1.1704	0.9594	0.0228	96.8642	6.78442	1.21558	8	0.226709	0.148513	0.00437471	0.627344	2.76718	1.18862	0.0372563	5	0	1.77304	0.226963	2	0.106976	0.180115	0.287091	0.699525	69.9525	3.7	1.25	370	125	850	24.5	15.2065	0.987095	-11.75	5.23462
21NB-5Hbl18		46.4666	1.3965	8.0919	0	15.0929	0.4089	12.4942	11.3093	1.1078	0.9438	0	97.3119	6.81421	1.18579	8	0.212764	0.154006	0	0.61962	2.73145	1.23137	0.0507899	5	0	1.77692	0.223076	2	0.0919018	0.176569	0.268471	0.68927	68.927	4	1.25	400	125	850	22	16.152	0.942037	-11.7828	5.25341
21NB-5Hbl19		45.3984	1.5295	8.2106	0.013	15.3018	0.3587	12.4832	11.2471	1.3211	0.994	0.0209	96.8783	6.71072	1.28928	8	0.141121	0.17002	0.00151931	0.678008	2.75084	1.21358	0.0449103	5	0	1.78126	0.218739	2	0.159885	0.187446	0.347331	0.693882	69.3882	3.6	1	360	100	867	23.5	14.8913	0.915551	-11.5034	4.6647
21NB-5Hbl20		46.5637	1.3473	7.9301	0.0049	14.2671	0.3047	12.6559	11.1405	1.1141	0.8143	0	96.1426	6.88002	1.11998	8	0.260965	0.149703	0.000572416	0.559136	2.7877	1.20379	0.038133	5	0	1.76362	0.236378	2	0.0827841	0.153493	0.236277	0.698411	69.8411	3.5	1.4	350	140	841	20	14.576	1.01363	-11.9063	5.5823
21NB-5Hbl21		46.141	1.4395	8.3848	0.0049	14.7854	0.2805	12.6237	11.4441	1.2037	0.92	0	97.2276	6.77541	1.22459	8	0.226501	0.158958	0.000568876	0.563605	2.76341	1.25207	0.0348873	5	0	1.80048	0.199519	2	0.143178	0.172344	0.315523	0.68819	68.819	4	1.25	400	125	850	25	16.152	0.921599	-11.8032	5.30995
21NB-5Hbl22		45.1017	1.8369	8.6162	0.0522	15.1255	0.3183	11.7729	11.2696	1.2785	1.0187	0	96.3905	6.72784	1.27216	8	0.242628	0.206059	0.00615639	0.445338	2.61804	1.44156	0.0402166	5	0	1.80115	0.198851	2	0.170915	0.193861	0.364776	0.644901	64.4901	3.5	0.75	350	75	858	25	14.576	0.559834	-12.0326	5.2751
21NB-5Hbl23		44.9092	1.8237	8.8819	0.0294	15.4742	0.3105	11.7425	11.43	1.3126	1.0043	0	96.9183	6.67367	1.32633	8	0.229239	0.203801	0.00345422	0.47777	2.60136	1.44529	0.039082	5	0	1.81984	0.180156	2	0.19803	0.190394	0.388424	0.642842	64.2842	3.7	0.9	370	90	856	25	15.2065	0.531828	-12.0904	5.3663
21NB-5Hbl24		44.4378	1.9034	9.2273	0	15.3647	0.3802	11.4819	11.1729	1.2955	1.0772	0.0493	96.3902	6.63766	1.36234	8	0.262054	0.213804	0	0.51607	2.55674	1.40323	0.0481017	5	0	1.78808	0.21192	2	0.163263	0.205267	0.368531	0.645647	64.5647	3.5	0.9	350	90	850	25	14.576	0.460027	-12.2853	5.51777
21NB-5Hbl25		43.6787	0.8049	9.5373	0.0324	16.3287	0.348	13.6148	9.3539	0.7817	0.6264	0.0133	95.1201	6.32342	1.62728	8	0	0.0383355	0.00370852	0.649868	2.93836	1.32706	0.0426725	5	0	1.45089	0.219415	1.6703	0	0.11569	0.11569	0.688879	68.8879	3.8	1.6	380	160	825	25	15.5217	1.70199	-11.5231	3.71447
21NB-5Hbl26		45.3087	1.0483	8.2113	0.0667	15.6134	0.428	12.8525	10.1306	0.9801	0.7256	0	95.3652	6.66249	1.33751	8	0.08555	0.115921	0.00775451	1.40469	2.81743	0.51534	0.0533071	5	2.88658e-15	1.59606	0.279428	1.87549	0	0.136117	0.136117	0.845372	84.5372	3.7	1.85	370	185	830	19	15.2065	1.3969	-11.7321	5.24679
21NB-5Hbl27		45.8323	1.1469	8.282	0.0766	15.5067	0.3402	12.2393	11.1706	1.232	0.9263	0.0417	96.7946	6.76926	1.23074	8	0.21091	0.127385	0.00894482	0.693414	2.69486	1.22192	0.0425589	5	0	1.76768	0.232316	2	0.120481	0.174535	0.295016	0.688029	68.8029	4	1.35	400	135	842	26	16.152	0.946736	-11.9331	5.33029
21NB-5Hbl28		45.589	1.2138	8.3089	0.0702	14.9737	0.3605	12.3276	11.2677	1.0949	0.9526	0	96.1589	6.76895	1.23105	8	0.222937	0.135529	0.00824085	0.648208	2.72867	1.21108	0.045337	5	0	1.79248	0.207516	2	0.10768	0.18044	0.28812	0.6926	69.26	3.8	1.35	380	135	850	25	15.5217	0.965853	-11.7672	5.39484
21NB-5Hbl29		45.9275	1.2229	8.4198	0	15.138	0.3688	12.2721	11.1443	1.2015	0.9029	0	96.5978	6.78186	1.21814	8	0.247179	0.135797	0	0.659005	2.7015	1.21039	0.0461268	5	0	1.76314	0.236858	2	0.107131	0.170089	0.27722	0.690588	69.0588	3.7	1.35	370	135	841	25	15.2065	0.925845	-11.9859	5.58099
21NB-5Hbl30		46.2476	1.2119	7.9981	0.0522	14.7624	0.3545	12.7331	10.9036	0.9916	0.8652	0	96.1202	6.81233	1.18767	8	0.200832	0.134244	0.00607925	0.824858	2.79609	0.993668	0.0442291	5	0	1.72082	0.279183	2	0.00401303	0.162586	0.166599	0.737802	73.7802	3.7	1.5	370	150	844	16.5	15.2065	1.18254	-11.6707	5.58099
21NB-5Hbl31		46.7343	1.0463	8.4878	0	14.4793	0.3967	12.3355	11.8036	0.9117	0.4593	0.021	96.6755	6.87589	1.12411	8	0.347672	0.115764	0	0.477317	2.70558	1.30423	0.0494358	5	0	1.86066	0.139343	2	0.120727	0.0862086	0.206935	0.67474	67.474	3	0.6	300	60	856	22	12.9992	0.905401	-11.7454	5.58099
21NB-5Hbl32		46.525	1.1459	8.7508	0	14.7215	0.3332	12.5342	11.5454	1.0399	0.4626	0.0267	97.0852	6.79736	1.20264	8	0.304163	0.125899	0	0.651359	2.72999	1.14736	0.041233	5	0	1.80726	0.192737	2	0.101834	0.0862225	0.188057	0.704087	70.4087	3	0.45	300	45	850	25	12.9992	0.975552	-11.7454	5.58099
21NB-5Hbl33		46.3554	1.0373	8.7366	0	14.9583	0.3394	11.9723	11.5716	0.9192	0.6426	0	96.5327	6.84197	1.15803	8	0.361739	0.115135	0	0.522129	2.63432	1.32424	0.0424305	5	0	1.82992	0.170077	2	0.0929707	0.120999	0.21397	0.665474	66.5474	4.5	2	450	200	853	29	17.7272	0.975552	-11.7454	5.58099
21NB-5Hbl34		47.8954	0.796	7.4937	0	14.3196	0.3109	13.1582	12.0282	0.8368	0.4842	0.0764	97.3994	6.98181	1.01819	8	0.269245	0.087259	0	0.490685	2.85944	1.25498	0.0383867	5	0	1.8786	0.121404	2	0.115101	0.0900451	0.205146	0.69498	69.498	3	0.95	300	95	820	46.5	12.9992	0.975552	-11.7454	5.58099
21NB-5Hbl35		46.7536	0.5108	8.8435	0	15.3236	0.3307	11.8683	11.8846	1.0946	0.2938	0.0133	96.9168	6.87955	1.12045	8	0.413189	0.0565222	0	0.47949	2.60342	1.40616	0.0412159	5	0	1.87365	0.126352	2	0.185928	0.0551515	0.24108	0.649299	64.9299	3.5	0.55	350	55	850	34.5	14.576	0.975552	-11.7454	5.58099
21NB-5Hbl36		47.466	0.4946	8.7513	0	15.2543	0.3595	12.2197	11.7596	1.0793	0.2627	0.0458	97.6928	6.89988	1.10012	8	0.399176	0.0540675	0	0.576871	2.64808	1.27755	0.0442633	5	0	1.83151	0.168486	2	0.135704	0.048717	0.184421	0.674562	67.4562	3.2	0.9	320	90	833	37.5	13.63	0.975552	-11.7454	5.58099
21NB-5Hbl37		46.2637	1.3647	8.5889	0	14.8346	0.3779	11.8232	11.2804	1.0299	0.6374	0.0763	96.277	6.85276	1.14724	8	0.352162	0.152015	0	0.494366	2.61078	1.34326	0.047412	5	0	1.79023	0.209772	2	0.0860052	0.120448	0.206453	0.660282	66.0282	4	1.4	400	140	850	25	16.152	0.975552	-11.7454	5.58099
21NB-5Hbl38		45.6093	0.7331	9.912	0	15.3069	0.3073	11.2648	11.846	1.2197	0.4967	0.0229	96.7187	6.76101	1.23899	8	0.492718	0.081723	0	0.375473	2.48939	1.52211	0.038584	5	0	1.88143	0.118568	2	0.231987	0.093932	0.325919	0.620562	62.0562	3.9	1	390	100	850	32.5	15.8369	0.975552	-11.7454	5.58099
21NB-5Hbl39		45.5401	1.6364	8.9219	0	14.0201	0.365	12.1659	11.6331	1.0641	0.7662	0.0115	96.1243	6.76934	1.23066	8	0.332356	0.182921	0	0.375084	2.69592	1.36776	0.0459548	5	0	1.8527	0.147295	2	0.15938	0.145297	0.304676	0.663418	66.3418	4.5	1.25	450	125	874	20	17.7272	0.975552	-11.7454	5.58099
21NB-5Hbl41		45.8558	1.695	8.5343	0	14.177	0.3115	12.2007	11.4921	1.0259	0.8007	0.0899	96.1829	6.81309	1.18691	8	0.30751	0.189384	0	0.394541	2.70237	1.36699	0.0392007	5	0	1.8294	0.170603	2	0.124925	0.151768	0.276693	0.664078	66.4078	3.7	1	370	100	865	20	15.2065	0.975552	-11.7454	5.58099
21NB-5Hbl42		46.3726	1.7571	8.4741	0	14.2353	0.4039	12.3557	11.3354	0.9837	0.7882	0.0364	96.7424	6.82354	1.17646	8	0.293128	0.194432	0	0.49171	2.71035	1.26004	0.0503394	5	0	1.78708	0.212922	2	0.0677217	0.14796	0.215682	0.682642	68.2642	3.7	1	370	100	862	20	15.2065	0.975552	-11.7454	5.58099
21NB-5Hbl43		46.3388	1.5958	8.3915	0	13.9053	0.3591	12.3321	11.476	1.0327	0.6958	0	96.1271	6.86531	1.13469	8	0.330552	0.177794	0	0.377102	2.72372	1.34577	0.0450627	5	2.44249e-15	1.82165	0.178352	2	0.118291	0.131511	0.249801	0.669304	66.9304	4	1.25	400	125	867	17.5	16.152	0.975552	-11.7454	5.58099
21NB-5Hbl44		45.4908	1.4816	8.7658	0	15.3024	0.3217	11.9439	11.6155	0.9322	0.7376	0	96.5915	6.73467	1.26533	8	0.264129	0.164948	0	0.579583	2.63602	1.31498	0.0403394	5	0	1.84242	0.157578	2	0.109997	0.139307	0.249304	0.667179	66.7179	4.5	1.35	450	135	869	26	17.7272	0.975552	-11.7454	5.58099
21NB-5Hbl45		45.9263	1.4606	8.6694	0	15.0196	0.3117	11.9558	11.6472	1.0153	0.7284	0.0077	96.742	6.79304	1.20696	8	0.304325	0.162464	0	0.457511	2.63628	1.40037	0.0390504	5	0	1.84579	0.154208	2	0.136959	0.137446	0.274405	0.653087	65.3087	4.5	1.35	450	135	867	29	17.7272	0.975552	-11.7454	5.58099
21NB-5Hbl46		45.2433	1.5337	8.745	0	14.9706	0.3996	11.9705	11.7869	0.9405	0.7093	0.0038	96.3032	6.72904	1.27096	8	0.261934	0.171539	0	0.503633	2.65413	1.35843	0.0503396	5	0	1.87826	0.121735	2	0.149472	0.134583	0.284055	0.661455	66.1455	4.5	1.2	450	120	875	23	17.7272	0.975552	-11.7454	5.58099
21NB-7Hbl1	Diorite	46.102	0.9816	8.1807	0	14.7274	0.2145	12.5752	11.2267	0.9681	0.7964	0.0629	95.8355	6.83176	1.16824	8	0.260514	0.109388	0	0.695293	2.77804	1.12984	0.0269232	5	0	1.78247	0.217525	2	0.0606238	0.150558	0.211182	0.710881	71.0881	3.4	1.7	340	170	844	31	14.2607	1.13522	-11.7303	5.92838
21NB-7Hbl2		46.5156	1.0019	7.8168	0	14.6387	0.38	12.6794	11.4466	1.0074	0.7496	0.0286	96.2646	6.8757	1.1243	8	0.237468	0.111369	0	0.608394	2.79401	1.20118	0.047576	5	0	1.81282	0.187185	2	0.101527	0.141354	0.242881	0.699343	69.9343	4	1.55	400	155	850	29	16.152	1.11494	-11.6099	5.78189
21NB-7Hbl3		46.1177	0.9712	8.361	0	14.6746	0.2839	12.3275	11.2851	0.8892	0.8242	0.0992	95.8336	6.84456	1.15544	8	0.307044	0.108395	0	0.630694	2.72749	1.19069	0.0356886	5	0	1.79449	0.205506	2	0.050365	0.156053	0.206418	0.696112	69.6112	3.8	2.05	380	205	850	28.5	15.5217	1.04259	-11.6904	6.25269
21NB-7Hbl4		46.3717	1.1072	7.8777	0	14.9584	0.2923	12.6722	11.5598	0.9632	0.664	0	96.4665	6.8397	1.1603	8	0.209127	0.12281	0	0.651539	2.78642	1.19358	0.0365173	5	0	1.82681	0.173191	2	0.10226	0.124943	0.227203	0.700105	70.0105	4.2	1.7	420	170	858	25.5	16.7822	1.09983	-11.4641	5.94499
21NB-7Hbl5		45.6565	1.633	8.98	0	15.3147	0.2901	11.5131	11.2999	1.0307	0.9766	0	96.6946	6.76896	1.23104	8	0.338064	0.182066	0	0.457947	2.54462	1.44087	0.0364295	5	0	1.79495	0.205048	2	0.0912275	0.184713	0.27594	0.63847	63.847	4	1.25	400	125	844	25	16.152	0.542464	-12.2984	6.23174
21NB-7Hbl6		44.6683	1.7987	9.1825	0	15.6213	0.3469	11.4826	11.2838	1.1768	0.9899	0	96.5508	6.6502	1.3498	8	0.261411	0.20138	0	0.558111	2.54851	1.38684	0.0437447	5	0	1.7999	0.200095	2	0.139595	0.188013	0.327608	0.647594	64.7594	3.7	1.15	370	115	856	25	15.2065	0.507109	-12.1152	5.85807
21NB-7Hbl7		44.1019	1.9788	8.8576	0	15.8376	0.2916	11.5205	10.9177	1.2498	1.0339	0.0076	95.797	6.61309	1.38691	8	0.17846	0.223137	0	0.692985	2.57531	1.29308	0.0370357	5	0	1.75403	0.245971	2	0.117384	0.197782	0.315166	0.665732	66.5732	3.5	0.95	350	95	839	23	14.576	0.567765	-12.3914	5.17829
21NB-7Hbl8		46.599	1.8558	7.9174	0	15.5747	0.3165	11.8562	11.4787	1.0329	0.8836	0	97.5148	6.86105	1.13895	8	0.234934	0.205479	0	0.410674	2.60238	1.50707	0.0394706	5	0	1.81078	0.189223	2	0.105638	0.16597	0.271608	0.633268	63.3268	3.7	1	370	100	862	24	15.2065	0.600349	-11.9083	5.5542
21NB-7Hbl9		44.9115	1.9632	9.0961	0	15.388	0.3043	11.5778	11.6797	1.2227	1.0146	0.0038	97.1617	6.67298	1.32702	8	0.265816	0.219356	0	0.359324	2.56448	1.55273	0.0382957	5	0	1.85931	0.140688	2	0.211542	0.192317	0.403859	0.622868	62.2868	3.7	1.15	370	115	858	25	15.2065	0.39873	-12.1855	5.66492
21NB-7Hbl10		44.1192	1.9948	8.7544	0	15.3177	0.2285	11.4103	11.0608	1.2201	1.0601	0	95.1659	6.67301	1.32699	8	0.233551	0.226891	0	0.492477	2.57278	1.44503	0.0292729	5	0	1.79242	0.207582	2	0.150212	0.204551	0.354764	0.640343	64.0343	3.3	0.9	330	90	850	25	13.9454	0.477283	-12.2762	5.26099
21NB-7Hbl11		44.6124	1.6445	8.8327	0	15.0666	0.3045	12.0371	11.3434	1.0627	0.9569	0	95.8608	6.66151	1.33849	8	0.21592	0.18466	0	0.633786	2.67948	1.24765	0.0385115	5	0	1.81476	0.185241	2	0.12242	0.182282	0.304702	0.6823	68.23	4	1	400	100	857	25	16.152	0.769297	-11.8217	5.5918
21NB-7Hbl12		45.0524	1.7025	8.0939	0	14.6656	0.3292	12.1297	11.2889	1.117	0.9752	0.0114	95.3658	6.77104	1.22896	8	0.204708	0.192419	0	0.49134	2.71768	1.35195	0.0419067	5	0	1.81781	0.182194	2	0.143293	0.186979	0.330272	0.667795	66.7795	3.7	1	370	100	867	22	15.2065	0.774153	-11.6408	5.07684
21NB-7Hbl13		44.2934	1.8555	8.9761	0	15.1653	0.3022	11.2148	11.1927	1.1476	1.112	0.0286	95.2882	6.70136	1.29864	8	0.301905	0.21111	0	0.394576	2.52945	1.52423	0.0387262	5	0	1.81434	0.185664	2	0.15097	0.21463	0.3656	0.623988	62.3988	3.7	1	370	100	850	26.5	15.2065	0.405709	-12.3314	5.62353
21NB-7Hbl14		45.9262	1.4356	7.342	0	16.294	0.4203	11.2679	11.5516	0.8941	0.8184	0.0153	95.9654	6.90706	1.09294	8	0.208434	0.162364	0	0.419295	2.52631	1.63006	0.05354	5	0	1.86137	0.138627	2	0.122087	0.157022	0.279108	0.607817	60.7817	4.3	1.5	430	150	875	31.5	17.0972	0.601491	-11.6411	5.70546
21NB-7Hbl15		45.7346	1.3054	8.3644	0	14.8484	0.2717	12.2636	11.2047	0.9398	0.8239	0.0286	95.7851	6.79453	1.20547	8	0.25908	0.145841	0	0.660848	2.71608	1.18396	0.0341893	5	0	1.7835	0.216499	2	0.0542048	0.156153	0.210358	0.696424	69.6424	4	1.5	400	150	850	26	16.152	0.960052	-11.7648	6.00249
21NB-7Hbl16		46.0204	1.0797	8.3357	0.036	14.5719	0.3089	12.7653	11.1248	1.1933	0.866	0.0266	96.3286	6.78589	1.21411	8	0.234509	0.119724	0.00419694	0.716796	2.80607	1.08013	0.0385798	5	0	1.75755	0.242451	2	0.0987028	0.162905	0.261608	0.722061	72.2061	4	1.5	400	150	838	19	16.152	1.12716	-11.831	5.47921
21NB-7Hbl17		46.779	0.8778	7.9869	0	14.6438	0.3971	12.4843	11.4333	0.8497	0.8067	0	96.2586	6.90691	1.09309	8	0.296748	0.0974655	0	0.588851	2.74794	1.21933	0.0496613	5	0	1.80868	0.191316	2	0.0519284	0.151952	0.20388	0.692652	69.2652	4	2.1	400	210	843	37.5	16.152	1.09245	-11.7678	6.15021
21NB-7Hbl18		46.251	1.0267	8.1852	0	14.5057	0.3231	12.8508	11.0638	1.0955	0.7679	0.0437	96.1134	6.81456	1.18544	8	0.235909	0.113758	0	0.77164	2.82265	1.01572	0.0403218	5	0	1.74654	0.253456	2	0.0594929	0.144339	0.203831	0.735378	73.5378	4	2	400	200	842	15	16.152	1.20585	-11.6739	5.75425
21NB-7Hbl19		44.4583	1.9531	8.9796	0.0768	15.2852	0.3185	11.6469	11.2508	1.3523	1.106	0.0246	96.4521	6.64424	1.35576	8	0.225868	0.219503	0.00907459	0.476102	2.59486	1.43428	0.040317	5	0	1.8015	0.198499	2	0.193342	0.210867	0.404209	0.644023	64.4023	3.5	0.9	350	90	850	26.5	14.576	0.48447	-12.2608	5.0891
21NB-7Hbl20		44.3396	1.9007	9.1799	0	15.3229	0.3306	11.5924	11.5058	1.3901	1.1156	0.0209	96.6985	6.62819	1.37181	8	0.245515	0.213668	0	0.3977	2.58338	1.51788	0.0418593	5	0	1.8428	0.157197	2	0.2457	0.212752	0.458451	0.629898	62.9898	3.2	0.9	320	90	850	25	13.63	0.421985	-12.3356	5.19578
21NB-7Hbl21		44.5207	2.1256	9.0441	0.1251	15.7113	0.2364	11.5276	11.1012	1.3234	1.1161	0.0211	96.8526	6.62195	1.37805	8	0.207371	0.237754	0.0147114	0.548829	2.55608	1.40548	0.0297823	5	0	1.7691	0.230899	2	0.150746	0.211782	0.362527	0.645221	64.5221	3.2	1	320	100	850	16.5	13.63	0.442398	-12.3152	5.07226
21NB-7Hbl22		44.1532	1.7713	9.3221	0.0823	15.8099	0.2931	11.5369	11.2485	1.2598	1.1214	0.0058	96.6043	6.58203	1.41797	8	0.219856	0.19857	0.00969999	0.620687	2.56388	1.3503	0.0370084	5	0	1.7966	0.203401	2	0.160719	0.213265	0.373984	0.655024	65.5024	3.5	1.15	350	115	850	29	14.576	0.539684	-12.2056	5.33523
21NB-7Hbl23		44.814	1.8979	8.5411	0.0793	14.9407	0.2773	11.8443	11.5265	1.3919	1.0196	0.0518	96.3844	6.7151	1.2849	8	0.223474	0.213863	0.00939476	0.323959	2.64581	1.5483	0.0351945	5	0	1.85053	0.149474	2	0.254907	0.194908	0.449815	0.63084	63.084	3.5	0.9	350	90	862	24	14.576	0.503589	-12.0132	5.00057
21NB-7Hbl24		44.601	1.9467	8.9411	0.0824	15.646	0.3356	11.6452	11.4467	1.4443	1.1244	0.0077	97.2211	6.63425	1.36575	8	0.201697	0.217756	0.00969053	0.440438	2.58229	1.50585	0.042282	5	0	1.82426	0.175743	2	0.24079	0.213368	0.454158	0.631654	63.1654	3.2	0.9	320	90	855	25	13.63	0.440015	-12.2217	4.87363
21NB-7Hbl25		44.4174	1.8571	8.9083	0.0758	15.3507	0.3094	11.7626	11.0827	1.4648	1.0425	0.0402	96.3115	6.63648	1.36352	8	0.205156	0.208662	0.0089542	0.560759	2.61998	1.35733	0.0391553	5	0	1.77414	0.225857	2	0.198476	0.198711	0.397187	0.658732	65.8732	3.2	0.95	320	95	848	24.5	13.63	0.566195	-12.23	5.02261
21NB-7Hbl26		44.8365	1.6675	8.8882	0.0494	15.2787	0.2668	11.9806	11.1079	1.3234	1.0375	0	96.4365	6.66382	1.33618	8	0.220712	0.186372	0.00580486	0.621231	2.65449	1.27781	0.0335864	5	0	1.76881	0.231188	2	0.150165	0.196716	0.346881	0.675048	67.5048	3.8	1.1	380	110	842	19	15.5217	0.707908	-12.1801	5.19686
21NB-7Hbl27		44.3979	1.8008	8.9917	0.0313	14.984	0.2888	11.9404	10.7314	1.4287	1.0651	0.0077	95.6678	6.63797	1.36203	8	0.222389	0.20247	0.00369991	0.675598	2.66135	1.19792	0.0365726	5	0	1.71905	0.280952	2	0.133198	0.203154	0.336352	0.6896	68.96	3.2	0.9	320	90	838	16	13.63	0.698354	-12.2929	5.04736
21NB-7Hbl28		44.6769	1.9267	8.6369	0.0329	15.5452	0.3392	11.9722	11.2044	1.433	1.0671	0.021	96.8555	6.64026	1.35974	8	0.15318	0.215347	0.00386609	0.588268	2.65269	1.34394	0.0427016	5	0	1.78422	0.215776	2	0.19717	0.202334	0.399504	0.663731	66.3731	3.5	0.9	350	90	856	28	14.576	0.622836	-12.0076	4.64886
21NB-7Hbl29		45.9259	1.4649	8.6212	0.0345	15.3381	0.2867	12.5362	11.1671	1.1479	1.0902	0.046	97.6587	6.71024	1.28976	8	0.194817	0.160958	0.00398541	0.744343	2.73059	1.12982	0.0354809	5	0	1.74815	0.251847	2	0.0733362	0.203211	0.276547	0.707331	70.7331	3.5	1	350	100	838	17	14.576	0.960591	-12.0182	4.97949
21NB-7Hbl31		45.7444	1.3696	8.3011	0.074	15.2376	0.2666	12.1231	11.3053	1.2817	0.8912	0.044	96.6386	6.78407	1.21593	8	0.234989	0.152746	0.00867676	0.536904	2.68026	1.35294	0.0334887	5	0	1.79636	0.203641	2	0.164898	0.168612	0.33351	0.66455	66.455	3.7	1.1	370	110	850	25	15.2065	0.801426	-11.9357	5.42238
21NB-7Hbl33		45.3018	1.3956	8.2067	0.0577	14.6765	0.2688	12.3805	11.2014	1.5109	0.9745	0.1169	96.0913	6.76713	1.23287	8	0.211948	0.156774	0.00681457	0.491754	2.75701	1.34169	0.0340098	5	0	1.79275	0.207248	2	0.230343	0.185709	0.416052	0.672654	67.2654	3.3	1.15	330	115	850	25	13.9454	0.846579	-11.9069	4.75262
21NB-7Hbl34		46.1064	1.0601	8.4049	0	14.5097	0.3134	12.5794	11.5841	1.0394	0.9933	0.0786	96.6693	6.81411	1.18589	8	0.278087	0.11782	0	0.518467	2.77152	1.27487	0.0392313	5	0	1.83429	0.165707	2	0.132127	0.187279	0.319406	0.684936	68.4936	3.7	1.45	370	145	862	25.5	15.2065	1.00498	-11.5037	5.52079
21NB-7Hbl35		46.4969	0.9762	8.1818	0	14.6791	0.2952	12.9902	11.1589	1.0873	0.7803	0	96.6459	6.80965	1.19035	8	0.221871	0.107513	0	0.796974	2.83614	1.00089	0.0366187	5	0	1.75098	0.249023	2	0.0597179	0.145788	0.205506	0.73915	73.915	4	1.65	400	165	842	19	16.152	1.24954	-11.6302	5.66424
21NB-7Hbl36		45.5943	1.0069	8.4665	0.1153	14.6005	0.3416	11.9408	11.1274	1.8375	0.8726	0.0364	95.9398	6.83482	1.16518	8	0.33062	0.113508	0.0136653	0.318589	2.66846	1.51179	0.0433731	5	0	1.78718	0.212819	2	0.321238	0.166875	0.488114	0.63835	63.835	3.4	1.6	340	160	844	31	14.2607	0.685614	-12.1799	5.40598
21NB-7Hbl37		45.8858	1.1289	8.3126	0.1186	15.0609	0.307	12.4467	11.3494	1.2223	0.8337	0.0211	96.687	6.77582	1.22418	8	0.222505	0.125361	0.0138465	0.638861	2.73999	1.22104	0.0383979	5	0	1.79562	0.204378	2	0.145571	0.157056	0.302627	0.691736	69.1736	4	1.5	400	150	850	28	16.152	0.98049	-11.7443	5.5625
17NB-5Hbl1		47.1691	1.0268	7.9762	0.0164	14.3824	0.4878	12.7914	11.328	1.251	0.4006	0	96.8297	6.90035	1.09965	8	0.275549	0.112959	0.00189684	0.615654	2.7896	1.1439	0.0604424	5	0	1.77552	0.22448	2	0.130346	0.0747628	0.205109	0.709191	70.9191	3	0.55	300	55	833	20	12.9992	1.076	-12.0224	6.64747
17NB-5Hbl2		47.2117	1.2507	7.9313	0.0066	14.1329	0.5538	13.0633	10.9305	1.0578	0.2803	0.0038	96.4227	6.87541	1.12459	8	0.236696	0.13697	0.000759917	0.851473	2.83604	0.869748	0.0683106	5	0	1.70548	0.294516	2	0.00415817	0.0520755	0.0562336	0.7653	76.53	2.7	0.45	270	45	828	20	12.0528	1.23097	-11.9798	6.90808
17NB-5Hbl3		47.1189	1.0659	8.0159	0.0082	14.2506	0.4716	12.8653	11.4553	1.0541	0.4183	0	96.7241	6.89256	1.10744	8	0.274516	0.117253	0.000948359	0.629731	2.80554	1.11358	0.0584313	5	0	1.79536	0.204643	2	0.0943158	0.0780611	0.172377	0.715859	71.5859	3	0.45	300	45	844	25	12.9992	1.1148	-11.7672	6.77432
17NB-5Hbl4		47.3226	1.0387	7.8744	0	14.4274	0.4273	12.7188	11.3257	1.0623	0.4202	0.0019	96.6193	6.93001	1.06999	8	0.289066	0.114387	0	0.618019	2.77666	1.14887	0.053001	5	0	1.77701	0.222994	2	0.0786234	0.0785023	0.157126	0.707333	70.7333	3	0.5	300	50	823	25	12.9992	1.0914	-12.2076	6.78723
17NB-5Hbl5		47.7697	0.8182	7.7672	0	14.0258	0.3931	13.1063	11.8803	0.9649	0.372	0.0171	97.1146	6.96662	1.03338	8	0.301644	0.089733	0	0.497563	2.84945	1.21306	0.0485578	5	0	1.85633	0.143668	2	0.129164	0.0692107	0.198375	0.701402	70.1402	3	0.85	300	85	820	43.5	12.9992	1.18618	-12.1737	6.91677
17NB-5Hbl6		47.4511	0.9233	7.7156	0	14.4336	0.4435	13.0513	11.4426	1.1315	0.3246	0	96.9171	6.92005	1.07995	8	0.246185	0.101258	0	0.675097	2.83745	1.08523	0.0547826	5	0	1.78791	0.212087	2	0.107848	0.060391	0.168239	0.723344	72.3344	2.8	0.7	280	70	825	28	12.3683	1.21215	-12.0548	6.68375
17NB-5Hbl7		46.9376	1.0447	7.6993	0.0557	14.3128	0.5255	12.524	11.3956	1.3152	0.5087	0.0323	96.3514	6.93976	1.06024	8	0.281375	0.116155	0.00651106	0.456734	2.76043	1.31298	0.0658085	5	0	1.80517	0.194826	2	0.18219	0.0959502	0.27814	0.67767	67.767	3	0.45	300	45	825	26	12.9992	0.958856	-12.2997	6.26487
17NB-5Hbl8		47.1533	1.0532	7.7741	0.0032	14.4715	0.4815	12.5788	11.566	0.9543	0.4939	0	96.5298	6.93647	1.06353	8	0.28429	0.116509	0.000372177	0.535134	2.75852	1.24518	0.0599941	5	0	1.82292	0.177077	2	0.0951025	0.0926886	0.187791	0.688993	68.8993	3	0.6	300	60	838	36	12.9992	1.03302	-11.9665	6.68082
17NB-5Hbl9		47.8571	1.1186	7.7264	0	13.9711	0.4732	13.1677	11.1599	1.2791	0.3855	0.0228	97.1614	6.94983	1.05017	8	0.27222	0.122159	0	0.629295	2.85068	1.06744	0.0582048	5	0	1.73639	0.263613	2	0.0965317	0.0714189	0.167951	0.727563	72.7563	2.8	0.45	280	45	812	24.5	12.3683	1.17048	-12.3619	6.43917
17NB-5Hbl10		46.8717	1.1265	7.9566	0.0475	13.9548	0.4932	13.0393	11.1485	1.1834	0.382	0.0323	96.2358	6.87265	1.12735	8	0.247633	0.124213	0.00550656	0.715069	2.85022	0.996103	0.0612524	5	0	1.75141	0.248586	2	0.08784	0.0714559	0.159296	0.741025	74.1025	2.9	0.55	290	55	838	19	12.6838	1.18805	-11.8156	6.57066
17NB-5Hbl11		46.4755	1.2083	8.1458	0.031	14.3911	0.4148	12.6155	11.1146	1.2708	0.5248	0	96.1922	6.84995	1.15005	8	0.264936	0.133925	0.00361242	0.641511	2.77191	1.13233	0.0517831	5	0	1.75516	0.244844	2	0.118305	0.0986775	0.216983	0.709975	70.9975	3	0.25	300	25	842	14	12.9992	1.01679	-11.9042	6.33875
17NB-5Hbl12		46.3115	1.0545	8.0167	0.0147	14.0407	0.411	12.2874	11.2763	1.128	0.5643	0	95.1051	6.92232	1.07768	8	0.334574	0.118531	0.00173721	0.45805	2.738	1.29707	0.0520344	5	0	1.80588	0.194124	2	0.132777	0.107605	0.240382	0.67855	67.855	3	0.6	300	60	838	25	12.9992	0.937615	-12.0619	6.63334
21NB-1Hbl1	Granodiorite	44.87	1.0065	9.1619	0.0341	16.3438	0.7123	11.3264	11.7389	1.1606	1.1003	0.0095	97.4643	6.65816	1.34184	8	0.260439	0.112314	0.00400061	0.577953	2.50554	1.45023	0.0895256	5	0	1.86631	0.133689	2	0.200218	0.208291	0.408509	0.633388	63.3388	4.4	2	440	200	867	26	17.4122	0.60107	-11.7856	5.83886
21NB-1Hbl2		44.6921	1.0455	8.8025	0.0293	16.1859	0.7402	10.8547	11.7223	1.0468	0.9132	0.0417	96.0742	6.73849	1.26151	8	0.302687	0.118544	0.00349279	0.44925	2.43983	1.59166	0.0945294	5	0	1.89366	0.106336	2	0.199677	0.175654	0.375331	0.605193	60.5193	4.7	2	470	200	875	28	18.3571	0.466173	-11.7604	6.50941
21NB-1Hbl3		45.0074	1.048	9.1146	0.1679	15.6609	0.6426	11.0866	11.3706	1.0931	0.926	0.0133	96.131	6.73769	1.26231	8	0.34581	0.117981	0.0198724	0.519019	2.47421	1.44163	0.0814805	5	0	1.82377	0.176235	2	0.141037	0.176847	0.317884	0.631846	63.1846	4.5	2	450	200	868	25	17.7272	0.549665	-11.8144	6.65976
21NB-1Hbl4		44.4332	0.9796	8.9531	0.0602	16.0456	0.7663	11.2886	11.5226	1.1886	1.0317	0.0304	96.2999	6.66504	1.33496	8	0.247836	0.110501	0.00713946	0.612179	2.52433	1.40065	0.0973599	5	0	1.85184	0.148155	2	0.197526	0.197429	0.394954	0.643144	64.3144	4.3	1.75	430	175	869	28	17.0972	0.643035	-11.7104	5.84992
21NB-1Hbl5		44.6844	1.1015	8.8436	0	16.3323	0.5643	11.3073	11.877	1.1731	0.9771	0.0304	96.891	6.68246	1.31754	8	0.241171	0.123876	0	0.495992	2.52087	1.54661	0.0714787	5	0	1.90303	0.0969682	2	0.243174	0.186415	0.429588	0.619762	61.9762	4	1.35	400	135	868	25	16.152	0.568104	-11.8161	5.86485
21NB-1Hbl6		44.4775	1.0822	9.2367	0.0227	16.4073	0.6881	10.7875	11.6101	1.1131	1.095	0	96.5202	6.67822	1.32178	8	0.312744	0.122194	0.00269476	0.492701	2.41464	1.56752	0.08751	5	0	1.86773	0.132267	2	0.191773	0.209747	0.40152	0.606364	60.6364	4.3	1.9	430	190	862	27.5	17.0972	0.426915	-12.0574	6.21171
TFeO = Total FeO content
P-T were calculated according to a thermobarometer of Higgins et al. (2022) based on machine learning of hornblende mineral compositions
H2O contents and oxygen fugacities were calculated according to the methods of Ridolfi et al. (2010)
Pressure (kbar) was converted to depth (km) using a regression fit based on PREM (Anderson, 1989)
Depth (km) = 14.6 + 29*P(GPa) − 0.157*[P(GPa) − 8.4]2.
Reference:
Anderson, D. L., 1989. Theory of the Earth. Boston, MA: Blackwell Scientific, 366 pp.
Higgins, O., Sheldrake, T., Caricchi, L., 2022. Machine learning thermobarometry and chemometry using amphibole and clinopyroxene: a window into the volcanic roots of an arc volcano (mount liamuiga, saint kitts). Contributions to Mineralogy and Petrology 177, 10.
Ridolfi, F., Renzulli, A., Puerini, M., 2010. Stability and chemical equilibrium of amphibole in calc-alkaline magmas: an overview, new thermobarometric formulations and application to subduction-related volcanoes. Contributions to Mineralogy and Petrology 160 (1), 45–66.

## Sheet: Zircon U-Pb age data
Supplementary Data S4 LA-ICP-MS zircon U-Pb dating results for the Neoproterozoic Nanba intrusive complex in the western Yangtze Block, South China
Analysis	Contents (ppm)			Ratios								Ages(Ma)
	Th	U	Th/U	207Pb/206Pb	1σ	207Pb/235U	1σ	206Pb/238U	1σ	208Pb/232Th	1σ	207Pb/206Pb	1σ	207Pb/235U	1σ	206Pb/238U	1σ	208Pb/232Th	1σ
21NB-3 (Cumulate gabbro, 27°5′56″N 101°54′38″E)
21NB-3-01	530.22	348.98	1.51934	0.06651	0.00292	1.19995	0.05065	0.1309	0.00172	0.03911	0.00073	822	66	801	23	793	10	775	14
21NB-3-02	205.93	155.26	1.32636	0.07086	0.00348	1.27241	0.0601	0.13027	0.0019	0.04063	0.00086	953	73	833	27	789	11	805	17
21NB-3-03	119.36	96.12	1.24178	0.06761	0.0042	1.23318	0.07411	0.13232	0.00234	0.03855	0.00106	857	95	816	34	801	13	765	21
21NB-3-04	36.18	41.28	0.876453	0.06719	0.00576	1.20982	0.10095	0.13063	0.003	0.0381	0.00169	844	136	805	46	791	17	756	33
21NB-3-05	154.93	98.01	1.58076	0.06503	0.0075	1.15841	0.13144	0.1292	0.00266	0.03953	0.0005	775	254	781	62	783	15	784	10
21NB-3-06	303.61	643.14	0.472075	0.06344	0.00199	1.16642	0.03467	0.1334	0.00135	0.03958	0.00086	723	46	785	16	807	8	785	17
21NB-3-07	290.92	243.66	1.19396	0.06559	0.00263	1.19099	0.04572	0.13173	0.0016	0.03883	0.00069	793	60	796	21	798	9	770	13
21NB-3-08	209.21	177.41	1.17925	0.06955	0.00444	1.23482	0.07629	0.12881	0.00236	0.03908	0.00113	915	97	817	35	781	13	775	22
21NB-3-09	186.93	161.14	1.16005	0.07301	0.00654	1.34376	0.11687	0.13353	0.00339	0.03512	0.0015	1014	136	865	51	808	19	698	29
21NB-3-10	955.74	588.55	1.62389	0.06738	0.00346	1.20284	0.05948	0.12951	0.00194	0.03272	0.00064	850	78	802	27	785	11	651	13
21NB-3-11	115.27	112.4	1.02553	0.06817	0.00396	1.2386	0.06954	0.13182	0.0022	0.03666	0.00106	874	89	818	32	798	13	728	21
21NB-3-12	857.57	474.08	1.80891	0.06421	0.00229	1.15908	0.03939	0.13096	0.00145	0.0368	0.00057	749	53	782	19	793	8	730	11
21NB-3-13	211.42	183.6	1.15153	0.07081	0.0078	1.25207	0.13402	0.12826	0.00395	0.03164	0.00174	952	170	824	60	778	23	630	34
21NB-3-15	1179.99	337.38	3.49751	0.08746	0.00451	1.57129	0.07756	0.13033	0.00217	0.03969	0.00102	1371	69	959	31	790	12	787	20
21NB-3-16	125.3	122.81	1.02028	0.06502	0.00274	1.16743	0.0473	0.13025	0.00163	0.03708	0.00078	775	64	785	22	789	9	736	15
21NB-3-17	452.19	224.71	2.01233	0.06224	0.00777	1.10905	0.13515	0.12924	0.00424	0.03269	0.00151	682	207	758	65	784	24	650	30
21NB-3-18	1174.93	535.6	2.19367	0.06361	0.00424	1.1565	0.07481	0.13186	0.00244	0.01402	0.00037	729	106	780	35	798	14	281	7
21NB-3-19	584.23	294.71	1.98239	0.06739	0.00239	1.23437	0.04163	0.13285	0.00148	0.01896	0.00032	850	51	816	19	804	8	380	6
21NB-3-20	1977.84	652.11	3.03299	0.06484	0.00316	1.16362	0.05459	0.13015	0.00184	0.03493	0.00084	769	75	784	26	789	10	694	16
21NB-3-21	160.47	138.6	1.15779	0.06252	0.00525	1.15103	0.09402	0.13351	0.00301	0.03718	0.00138	692	136	778	44	808	17	738	27
21NB-3-22	236.41	174.62	1.35385	0.07153	0.00418	1.29293	0.07295	0.13109	0.00225	0.03419	0.00098	973	87	843	32	794	13	680	19
21NB-3-23	327.48	168.27	1.94616	0.07252	0.00375	1.32466	0.06591	0.13246	0.00206	0.03499	0.00073	1001	76	857	29	802	12	695	14
21NB-3-24	336.22	170.35	1.9737	0.07501	0.00572	1.3766	0.10173	0.13308	0.00297	0.03542	0.00125	1069	113	879	43	805	17	704	24
21NB-2 (Hornblende gabbro, 27°5′56″N 101°54′38″E)
21NB-2-01	76.89	67.02	1.14727	0.07326	0.00792	1.31127	0.1377	0.12982	0.00399	0.03793	0.00191	1021	164	851	60	787	23	752	37
21NB-2-02	59.21	51.74	1.14438	0.06637	0.01068	1.18647	0.18613	0.12967	0.00558	0.03631	0.00271	818	263	794	86	786	32	721	53
21NB-2-03	86.89	80.21	1.08328	0.0655	0.00589	1.1705	0.10242	0.12961	0.00319	0.03692	0.00149	790	143	787	48	786	18	733	29
21NB-2-04	411.88	220.33	1.86938	0.06737	0.00336	1.22635	0.05906	0.13203	0.00195	0.03944	0.00082	849	75	813	27	799	11	782	16
21NB-2-05	64.69	55.35	1.16874	0.06541	0.0058	1.17807	0.10166	0.13064	0.00316	0.038	0.00144	788	141	790	47	792	18	754	28
21NB-2-06	57.96	57.67	1.00503	0.06268	0.00618	1.12931	0.1086	0.13069	0.00342	0.03456	0.00154	697	162	767	52	792	19	687	30
21NB-2-07	31.63	37.69	0.839215	0.06235	0.01109	1.15173	0.20029	0.13398	0.00609	0.03856	0.00352	686	302	778	95	811	35	765	69
21NB-2-08	35.21	41.83	0.84174	0.06804	0.00578	1.20572	0.10003	0.12852	0.00233	0.03912	0.0005	870	182	803	46	779	13	776	10
21NB-2-09	105.5	100.17	1.05321	0.06746	0.00814	1.22597	0.14409	0.13181	0.00435	0.03912	0.00238	852	192	813	66	798	25	776	46
21NB-2-10	60.26	59.04	1.02066	0.05876	0.0052	1.05655	0.09121	0.13041	0.003	0.04025	0.00155	558	149	732	45	790	17	798	30
21NB-2-11	95.27	93.08	1.02353	0.06517	0.00398	1.17191	0.06945	0.13044	0.00223	0.03754	0.00112	780	96	788	32	790	13	745	22
21NB-2-12	152.87	122.75	1.24538	0.06508	0.00427	1.17161	0.07465	0.13058	0.0024	0.0384	0.00109	777	103	787	35	791	14	762	21
21NB-2-13	47.71	50.88	0.937697	0.06409	0.00674	1.16423	0.11937	0.13177	0.00369	0.03899	0.00202	745	171	784	56	798	21	773	39
21NB-2-14	19.99	31.87	0.627236	0.06277	0.00716	1.14984	0.12801	0.13287	0.00392	0.03911	0.00258	700	189	777	60	804	22	775	50
21NB-2-15	609.13	291.05	2.09287	0.06599	0.00385	1.18554	0.06701	0.13031	0.00216	0.03674	0.00093	806	91	794	31	790	12	729	18
21NB-2-16	193.16	119.63	1.61465	0.06359	0.00353	1.15255	0.0619	0.13146	0.00205	0.03861	0.0009	728	87	778	29	796	12	766	18
21NB-2-17	55.58	48.2	1.15311	0.06306	0.0037	1.16203	0.0661	0.13365	0.00215	0.04716	0.00125	710	94	783	31	809	12	931	24
21NB-2-18	72.25	60.28	1.19857	0.06276	0.00502	1.1426	0.08901	0.13207	0.00285	0.03904	0.00137	700	130	774	42	800	16	774	27
21NB-2-19	50.53	54.37	0.929373	0.06358	0.00417	1.14747	0.07321	0.1309	0.00232	0.03911	0.00132	728	105	776	35	793	13	775	26
21NB-2-20	55.4	53.59	1.03377	0.06428	0.0046	1.18119	0.08217	0.13329	0.00261	0.04026	0.00141	751	114	792	38	807	15	798	27
21NB-2-21	83.05	85.21	0.974651	0.06511	0.00538	1.17192	0.09417	0.13056	0.0029	0.04063	0.00166	778	132	788	44	791	17	805	32
21NB-2-22	21.27	29.51	0.720773	0.06247	0.00568	1.14239	0.10125	0.13265	0.00316	0.03982	0.00203	690	149	774	48	803	18	789	39
21NB-2-23	45.04	46.43	0.970062	0.06639	0.00574	1.22479	0.10313	0.13383	0.00313	0.04168	0.00181	819	138	812	47	810	18	825	35
21NB-2-24	305.94	153.46	1.99361	0.06545	0.00829	1.16695	0.14402	0.12933	0.00439	0.03534	0.00161	789	205	785	67	784	25	702	31
21NB-5 (Gabbro-diorite, 27°5′12″N 101°53′45″E)
21NB-5-01	56.91	58	0.981207	0.06741	0.00734	1.21752	0.12913	0.13129	0.00387	0.03599	0.00186	850	173	809	59	795	22	715	36
21NB-5-02	70.72	62.42	1.13297	0.08194	0.00387	1.50154	0.06801	0.13321	0.00197	0.04067	0.00097	1244	65	931	28	806	11	806	19
21NB-5-03	26.62	32.85	0.81035	0.06712	0.00707	1.20124	0.12325	0.13009	0.00372	0.03666	0.00167	841	167	801	57	788	21	728	33
21NB-5-04	186.94	245.47	0.761559	0.06458	0.00184	1.16787	0.03125	0.13147	0.00122	0.03807	0.00067	761	41	786	15	796	7	755	13
21NB-5-05	52.95	58.14	0.910733	0.07685	0.00449	1.38403	0.07799	0.13092	0.00225	0.04038	0.00122	1117	85	882	33	793	13	800	24
21NB-5-06	42.04	47.15	0.891622	0.08379	0.00645	1.51384	0.11337	0.13103	0.00234	0.03898	0.00052	1288	155	936	46	794	13	773	10
21NB-5-07	59.27	64.61	0.91735	0.07001	0.00548	1.26549	0.09625	0.13142	0.00286	0.0355	0.00143	929	121	830	43	796	16	705	28
21NB-5-08	95.42	108.76	0.877345	0.06909	0.00361	1.2409	0.0626	0.1306	0.00196	0.03764	0.00101	901	79	819	28	791	11	747	20
21NB-5-09	139.86	107.76	1.29788	0.066	0.00491	1.18435	0.08553	0.13051	0.00262	0.03481	0.00111	806	118	793	40	791	15	692	22
21NB-5-10	55.03	61.87	0.889446	0.06849	0.00539	1.23343	0.09424	0.13098	0.00282	0.03748	0.00137	883	123	816	43	793	16	744	27
21NB-5-11	63.52	80.44	0.789657	0.06878	0.00419	1.23596	0.07281	0.13071	0.00221	0.0382	0.00126	892	94	817	33	792	13	758	25
21NB-5-12	64.57	61.45	1.05077	0.07255	0.00558	1.29883	0.09693	0.13022	0.00278	0.03893	0.0015	1001	117	845	43	789	16	772	29
21NB-5-13	104.87	113.23	0.926168	0.06805	0.00327	1.21973	0.05643	0.13039	0.00178	0.03701	0.00098	870	73	810	26	790	10	735	19
21NB-5-14	115.38	104.71	1.1019	0.07223	0.0034	1.30072	0.05887	0.13101	0.0018	0.03771	0.00092	992	70	846	26	794	10	748	18
21NB-5-15	27.26	33.05	0.824811	0.07182	0.00751	1.29933	0.13228	0.13162	0.00373	0.03976	0.00212	981	163	845	58	797	21	788	41
21NB-5-16	121.99	97.99	1.24492	0.06953	0.0046	1.2361	0.07921	0.12936	0.00235	0.03625	0.00109	915	102	817	36	784	13	720	21
21NB-5-17	49.51	61.58	0.803995	0.06791	0.00548	1.2268	0.09637	0.1315	0.0028	0.03723	0.00165	866	128	813	44	796	16	739	32
21NB-5-18	44.14	46.43	0.950678	0.07096	0.00574	1.27642	0.1004	0.13096	0.00284	0.03814	0.00153	956	126	835	45	793	16	757	30
21NB-5-19	79	74.13	1.0657	0.07419	0.00553	1.34859	0.09743	0.13235	0.00275	0.03785	0.0015	1047	112	867	42	801	16	751	29
21NB-5-20	48.69	54.21	0.898174	0.07113	0.0051	1.29126	0.08977	0.13218	0.00259	0.03812	0.00143	961	110	842	40	800	15	756	28
21NB-5-21	74.1	67.31	1.10088	0.07283	0.00614	1.30507	0.107	0.1305	0.003	0.03846	0.00155	1009	130	848	47	791	17	763	30
21NB-5-22	189.96	290.57	0.65375	0.07544	0.00235	1.34597	0.03932	0.12995	0.0013	0.04001	0.00096	1080	42	866	17	788	7	793	19
21NB-5-23	47.65	42.49	1.12144	0.07396	0.00452	1.36036	0.08038	0.13396	0.00229	0.03865	0.00123	1040	92	872	35	810	13	766	24
21NB-5-24	175.25	197.54	0.887162	0.06977	0.00273	1.25659	0.04687	0.1312	0.00151	0.03789	0.00096	922	58	826	21	795	9	752	19
17NB-5 (Diorite, 27°7′46″N 101°53′20″E)
17NB-5-01	32.92	30.05	1.09551	0.06508	0.00305	1.17323	0.05052	0.13067	0.00211	0.03613	0.0008	777	63	788	24	792	12	717	16
17NB-5-02	8.45	12.38	0.682553	0.06531	0.00866	1.16463	0.15089	0.12933	0.00368	0.03955	0.00081	784	294	784	71	784	21	784	16
17NB-5-03	7.93	12.53	0.632881	0.062	0.00425	1.1363	0.07451	0.13285	0.00264	0.03755	0.00143	674	106	771	35	804	15	745	28
17NB-5-04	16.91	15.47	1.09308	0.06351	0.00367	1.16144	0.06326	0.13267	0.00241	0.04149	0.00103	725	85	783	30	803	14	822	20
17NB-5-05	12.95	17.06	0.759086	0.06994	0.00355	1.27953	0.06022	0.13263	0.00232	0.03795	0.00108	927	68	837	27	803	13	753	21
17NB-5-06	11.02	17.67	0.623656	0.06804	0.00341	1.25224	0.05806	0.13342	0.0023	0.04125	0.0012	870	67	824	26	807	13	817	23
17NB-5-07	22.08	17.26	1.27926	0.06415	0.00363	1.16143	0.06188	0.13126	0.00235	0.03789	0.00086	747	82	783	29	795	13	752	17
17NB-5-08	6.98	9.44	0.739407	0.05677	0.01124	1.03473	0.20185	0.13214	0.00681	0.03657	0.00367	483	340	721	101	800	39	726	72
17NB-5-09	7.87	15.58	0.505135	0.07073	0.00351	1.29445	0.05935	0.1327	0.00228	0.04175	0.00135	950	66	843	26	803	13	827	26
17NB-5-10	7.54	10.72	0.703358	0.05783	0.00491	1.04573	0.08596	0.13112	0.00302	0.03975	0.0016	523	141	727	43	794	17	788	31
17NB-5-11	8.22	11.86	0.693086	0.07021	0.00486	1.27119	0.08402	0.13128	0.0029	0.0412	0.00166	935	99	833	38	795	17	816	32
17NB-5-12	4.04	9.36	0.431624	0.06075	0.00518	1.11974	0.09251	0.13366	0.00305	0.04169	0.00225	630	139	763	44	809	17	826	44
17NB-5-13	28.62	52.27	0.547542	0.0645	0.00216	1.17991	0.03337	0.13266	0.00171	0.03777	0.00072	758	38	791	16	803	10	749	14
17NB-5-14	7.68	12.52	0.613419	0.06499	0.00405	1.1929	0.0706	0.13311	0.00249	0.03739	0.00138	774	93	797	33	806	14	742	27
17NB-5-15	9.4	9.69	0.970072	0.06071	0.00493	1.10287	0.08666	0.13174	0.00277	0.03885	0.00124	629	134	755	42	798	16	770	24
17NB-5-16	9.85	16.32	0.603554	0.06354	0.00364	1.14739	0.0618	0.13095	0.00243	0.03832	0.00131	726	83	776	29	793	14	760	26
17NB-5-17	12.63	15.3	0.82549	0.06872	0.0038	1.23596	0.06406	0.13043	0.00236	0.03867	0.00109	890	77	817	29	790	13	767	21
17NB-5-18	13.16	13.09	1.00535	0.06406	0.00434	1.16981	0.0757	0.13244	0.00273	0.04018	0.0012	744	102	787	35	802	16	796	23
17NB-5-19	6.34	8.55	0.74152	0.06532	0.00559	1.18518	0.09824	0.13158	0.00312	0.03746	0.00169	785	135	794	46	797	18	743	33
17NB-5-20	7.08	10.25	0.690732	0.06373	0.00523	1.14855	0.09113	0.13072	0.00298	0.03767	0.0016	733	130	777	43	792	17	747	31
17NB-5-21	6.29	9.1	0.691209	0.06407	0.00564	1.1743	0.10026	0.13293	0.00322	0.04046	0.00183	744	140	789	47	805	18	802	36
17NB-5-22	9.79	12.82	0.763651	0.06062	0.00459	1.10425	0.08046	0.13212	0.00282	0.03802	0.00139	626	121	755	39	800	16	754	27
17NB-5-23	7.92	11.61	0.682171	0.06075	0.00677	1.09599	0.11928	0.13085	0.00407	0.03911	0.00233	630	183	751	58	793	23	775	45
17NB-5-24	7.15	10.76	0.664498	0.07155	0.00596	1.28624	0.10326	0.13039	0.00335	0.04351	0.00202	973	122	840	46	790	19	861	39
17NB-5-25	8.5	14.45	0.588235	0.06181	0.00654	1.1117	0.11464	0.13046	0.00386	0.03972	0.00229	668	172	759	55	790	22	787	45
17NB-5-26	5.08	7.05	0.720567	0.07153	0.00647	1.29463	0.11353	0.13128	0.00339	0.03877	0.00193	973	137	843	50	795	19	769	38
17NB-5-27	6.96	10.49	0.663489	0.07671	0.00938	1.39189	0.1658	0.13161	0.00511	0.04176	0.003	1114	177	885	70	797	29	827	58
17NB-5-28	5.58	8.69	0.642117	0.06433	0.01089	1.16306	0.19358	0.13114	0.00615	0.03932	0.00377	752	280	783	91	794	35	780	73
17NB-5-29	7.26	9.17	0.791712	0.06552	0.00795	1.17821	0.13962	0.13045	0.00465	0.0346	0.00223	791	191	790	65	790	27	688	44
17NB-5-30	18.64	30.86	0.604018	0.07024	0.00415	1.22954	0.07003	0.12695	0.00199	0.03851	0.00049	935	125	814	32	770	11	764	10
17NB-5-31	6.55	10.12	0.647233	0.06103	0.01215	1.10357	0.21635	0.13118	0.00723	0.03928	0.00402	640	336	755	104	795	41	779	78
17NB-5-32	11.15	18.82	0.592455	0.06584	0.00782	1.18391	0.13722	0.13043	0.0047	0.03591	0.00275	801	184	793	64	790	27	713	54
17NB-1 (Granodiorite, 27°5′28″N 101°55′41″E)
17NB-1-01	101.32	144.09	0.703172	0.05968	0.00431	1.07291	0.07439	0.13012	0.00296	0.03588	0.0014	592	111	740	36	789	17	713	27
17NB-1-02	38.26	48.39	0.790659	0.06259	0.00237	1.12828	0.03778	0.13049	0.0018	0.03781	0.00071	694	48	767	18	791	10	750	14
17NB-1-03	97.07	74.45	1.30383	0.06005	0.00384	1.08588	0.06615	0.13092	0.0027	0.03841	0.00101	605	96	747	32	793	15	762	20
17NB-1-04	38.74	71.24	0.543796	0.06543	0.00262	1.19393	0.0452	0.13234	0.0017	0.04046	0.00044	788	86	798	21	801	10	802	9
17NB-1-05	112.62	156.74	0.718515	0.06208	0.00158	1.13228	0.02139	0.13206	0.00148	0.03849	0.00047	677	22	769	10	800	8	763	9
17NB-1-06	287.06	245.84	1.16767	0.06307	0.00147	1.13666	0.01816	0.13052	0.00141	0.03758	0.00037	711	17	771	9	791	8	746	7
17NB-1-07	61.6	96.46	0.638607	0.0622	0.00207	1.11802	0.0317	0.1302	0.00168	0.03777	0.00069	681	39	762	15	789	10	749	13
17NB-1-08	105.62	81.46	1.29659	0.06314	0.00195	1.14232	0.02914	0.13106	0.00162	0.03772	0.00049	713	33	774	14	794	9	748	10
17NB-1-09	78.94	64.1	1.23151	0.06555	0.00345	1.18833	0.05838	0.13134	0.00236	0.03709	0.00086	792	73	795	27	796	13	736	17
17NB-1-10	71.69	62.05	1.15536	0.06139	0.00209	1.10751	0.03241	0.13072	0.00169	0.03776	0.00055	653	41	757	16	792	10	749	11
17NB-1-11	90.28	132.85	0.679563	0.0626	0.00169	1.12529	0.02342	0.13026	0.00151	0.03731	0.00051	695	25	766	11	789	9	740	10
17NB-1-12	42.96	46.82	0.917557	0.06923	0.00238	1.27561	0.03753	0.13353	0.00179	0.04117	0.00067	906	39	835	17	808	10	815	13
17NB-1-13	35.3	43.18	0.817508	0.06059	0.00234	1.08956	0.03723	0.13036	0.0018	0.03887	0.00071	625	50	748	18	790	10	771	14
17NB-1-14	78.52	90.65	0.866189	0.06209	0.00201	1.12811	0.03062	0.13173	0.00166	0.03827	0.00064	677	37	767	15	798	9	759	12
17NB-1-15	36.27	46.04	0.787793	0.06485	0.00237	1.17686	0.03752	0.1316	0.0018	0.03999	0.00073	769	44	790	18	797	10	793	14
17NB-1-16	65.73	57.49	1.14333	0.062	0.00209	1.13805	0.03265	0.1331	0.00172	0.03896	0.00056	674	39	772	16	806	10	773	11
17NB-1-17	32.25	34.65	0.930736	0.06594	0.00266	1.19725	0.04322	0.13167	0.00193	0.03855	0.00075	804	51	799	20	797	11	765	15
17NB-1-18	58.2	62.28	0.934489	0.06083	0.00226	1.10584	0.03611	0.13184	0.0018	0.03999	0.00069	633	47	756	17	798	10	793	13
17NB-1-19	52.53	61.08	0.86002	0.05977	0.00244	1.07196	0.03922	0.1301	0.00187	0.03834	0.00074	595	54	740	19	788	11	760	14
17NB-1-20	57.38	75.85	0.756493	0.06517	0.00207	1.18199	0.0313	0.13158	0.00167	0.03862	0.00062	780	35	792	15	797	10	766	12
17NB-1-21	32.41	40.37	0.802824	0.06635	0.00255	1.21481	0.04131	0.13283	0.00187	0.03994	0.00075	817	47	807	19	804	11	792	15
17NB-1-22	57.13	53.76	1.06269	0.06302	0.00234	1.14495	0.03714	0.13181	0.00181	0.03943	0.00066	709	46	775	18	798	10	782	13
17NB-1-23	59.16	51.69	1.14452	0.06835	0.00244	1.2494	0.0386	0.13264	0.00181	0.03894	0.00062	879	41	823	17	803	10	772	12
17NB-1-24	118.8	140.96	0.842792	0.06471	0.00167	1.17394	0.0223	0.13163	0.0015	0.0394	0.00048	765	22	788	10	797	9	781	9
17NB-1-25	111.05	100.94	1.10016	0.06285	0.00183	1.12938	0.02619	0.13042	0.00157	0.03618	0.00048	703	29	767	12	790	9	718	9
17NB-1-26	78.59	61.16	1.28499	0.06161	0.0021	1.13423	0.03299	0.13363	0.00174	0.04063	0.00058	661	40	770	16	809	10	805	11
17NB-1-27	164.46	133.19	1.23478	0.06694	0.0022	1.20818	0.03338	0.131	0.00171	0.03885	0.00056	836	36	804	15	794	10	770	11
17NB-1-28	45.49	50.09	0.908165	0.06268	0.00232	1.10992	0.03584	0.12853	0.00176	0.03826	0.00067	697	45	758	17	779	10	759	13
17NB-1-29	92.67	84.6	1.09539	0.06582	0.00202	1.17734	0.0295	0.12984	0.00161	0.03949	0.00054	801	32	790	14	787	9	783	10
17NB-1-30	68.05	58.55	1.16225	0.06573	0.00226	1.20806	0.03533	0.13342	0.00177	0.04112	0.00062	798	39	804	16	807	10	814	12
17NB-1-31	82.39	120.62	0.683054	0.06561	0.00177	1.20357	0.02447	0.13318	0.00155	0.04084	0.00055	794	24	802	11	806	9	809	11
17NB-1-32	85.91	110.02	0.780858	0.06501	0.00201	1.17294	0.02952	0.13099	0.00164	0.03994	0.00062	775	32	788	14	794	9	792	12
17NB-1-33	29.84	77.94	0.382859	0.05908	0.00354	1.06213	0.06018	0.13053	0.0025	0.03976	0.00186	570	90	735	30	791	14	788	36
17NB-1-34	41.61	44.55	0.934007	0.06592	0.00254	1.18767	0.04023	0.13082	0.00185	0.03973	0.00073	804	47	795	19	793	11	787	14
17NB-1-35	176.72	198.45	0.890501	0.06383	0.002	1.14551	0.02946	0.13031	0.00164	0.03958	0.00059	736	33	775	14	790	9	785	11
17NB-1-36	196.96	187.5	1.05045	0.06343	0.00263	1.14013	0.04223	0.13051	0.00194	0.03546	0.00064	723	53	773	20	791	11	704	12
21NB-1 (Granodiorite, 27°5′40″N 101°55′24″E)
21NB-1-01	270.23	372.43	0.725586	0.06561	0.00209	1.17187	0.03492	0.12953	0.00148	0.03959	0.00039	794	68	788	16	785	8	785	8
21NB-1-02	316.27	410.29	0.770845	0.06505	0.00149	1.16991	0.01722	0.13046	0.00137	0.04045	0.00041	776	15	787	8	790	8	801	8
21NB-1-03	183.42	281.82	0.650841	0.06855	0.00171	1.24345	0.02208	0.13157	0.00145	0.04107	0.0005	885	19	820	10	797	8	814	10
21NB-1-04	149.23	167.69	0.889916	0.0648	0.0016	1.1931	0.02075	0.13354	0.00146	0.04074	0.00045	768	19	797	10	808	8	807	9
21NB-1-05	316.01	482.89	0.654414	0.06569	0.00163	1.18096	0.0208	0.13039	0.00143	0.04027	0.00049	797	20	792	10	790	8	798	10
21NB-1-06	266.77	253.84	1.05094	0.06594	0.00157	1.18982	0.01906	0.13087	0.0014	0.04088	0.00042	804	17	796	9	793	8	810	8
21NB-1-07	340.67	552.53	0.616564	0.06459	0.00141	1.1736	0.01537	0.13179	0.00136	0.04175	0.00041	761	13	788	7	798	8	827	8
21NB-1-08	341.24	252.33	1.35236	0.06787	0.0024	1.21727	0.03702	0.13008	0.00175	0.03913	0.00058	865	41	809	17	788	10	776	11
21NB-1-09	80.93	168.31	0.480839	0.06666	0.00176	1.22276	0.02404	0.13305	0.0015	0.04329	0.0006	827	23	811	11	805	9	857	12
21NB-1-10	1367.79	656.86	2.08232	0.06656	0.00295	1.21525	0.04893	0.13243	0.00209	0.03815	0.00062	824	58	808	22	802	12	757	12
21NB-1-11	138.76	296.46	0.468056	0.06568	0.00148	1.18801	0.01682	0.13119	0.00137	0.04108	0.00045	796	14	795	8	795	8	814	9
21NB-1-12	117.68	208.16	0.565334	0.06474	0.00155	1.16376	0.01894	0.13038	0.0014	0.04109	0.00048	766	17	784	9	790	8	814	9
21NB-1-13	43.83	102.27	0.428571	0.06689	0.00225	1.21276	0.03798	0.1315	0.00159	0.04011	0.00042	834	72	806	17	796	9	795	8
21NB-1-14	51.79	96.57	0.536295	0.06677	0.00182	1.20645	0.02514	0.13105	0.00151	0.03892	0.00058	831	25	804	12	794	9	772	11
21NB-1-15	213.86	324.54	0.658963	0.06792	0.00159	1.21821	0.01894	0.13009	0.00139	0.04255	0.00046	866	16	809	9	788	8	842	9
21NB-1-16	194.44	202.05	0.962336	0.06846	0.00199	1.24308	0.0285	0.13169	0.00157	0.03957	0.00053	883	28	820	13	797	9	784	10
21NB-1-17	363.09	962.89	0.377084	0.06754	0.00193	1.21742	0.02728	0.13073	0.00154	0.05714	0.00147	854	27	809	12	792	9	1123	28
21NB-1-18	256.61	290.25	0.8841	0.06685	0.00153	1.19892	0.01774	0.13007	0.00137	0.03932	0.0004	833	15	800	8	788	8	780	8
21NB-1-19	315.24	299.42	1.05284	0.06474	0.00206	1.16144	0.03048	0.13013	0.00162	0.0376	0.00052	766	34	783	14	789	9	746	10
21NB-1-20	539.94	386.87	1.39566	0.06796	0.00166	1.22355	0.02074	0.13058	0.00142	0.03779	0.00038	867	18	811	9	791	8	750	7
21NB-1-21	503.61	447.42	1.12559	0.06796	0.00175	1.23004	0.02314	0.13127	0.00147	0.04165	0.00049	867	21	814	11	795	8	825	10
21NB-1-22	385.2	406.95	0.946554	0.06585	0.00149	1.20562	0.01727	0.13278	0.00139	0.04088	0.0004	802	14	803	8	804	8	810	8
21NB-1-23	275.29	263.43	1.04502	0.06807	0.0019	1.23586	0.02674	0.13167	0.00154	0.03904	0.00049	871	26	817	12	797	9	774	10
21NB-1-24	103.8	619.61	0.167525	0.06543	0.00142	1.17579	0.01529	0.13033	0.00134	0.04217	0.00053	788	13	789	7	790	8	835	10
21NB-1-25	233.1	266.64	0.874212	0.06749	0.00183	1.21862	0.02496	0.13095	0.0015	0.03837	0.00049	853	24	809	11	793	9	761	10
21NB-1-26	75.9	74.94	1.01281	0.06623	0.00195	1.21613	0.02861	0.13317	0.00159	0.04153	0.00055	814	30	808	13	806	9	822	11
21NB-1-27	261.91	289.81	0.90373	0.06625	0.00313	1.19131	0.0516	0.13041	0.00215	0.03893	0.00095	814	63	797	24	790	12	772	18
21NB-1-28	195.51	387.62	0.504386	0.06485	0.00156	1.1837	0.01949	0.13237	0.00142	0.04259	0.00052	769	18	793	9	801	8	843	10
21NB-1-29	132.1	196.06	0.673773	0.06653	0.00178	1.20025	0.02419	0.13084	0.00149	0.04395	0.0006	823	24	801	11	793	8	869	12
21NB-1-30	494.41	476.46	1.03767	0.06613	0.00144	1.20371	0.01564	0.13202	0.00136	0.04181	0.00038	810	12	802	7	799	8	828	7
21NB-1-31	452.7	321.79	1.40682	0.0651	0.00146	1.19273	0.01679	0.13287	0.00139	0.04005	0.00037	778	14	797	8	804	8	794	7
21NB-1-32	50.27	63.81	0.787808	0.06533	0.00242	1.20188	0.03876	0.13341	0.00183	0.04419	0.0008	785	45	801	18	807	10	874	15
21NB-1-33	167.89	142.29	1.17991	0.06499	0.00165	1.19384	0.0219	0.13322	0.00147	0.04	0.00043	774	21	798	10	806	8	793	8
21NB-1-34	293.78	408.72	0.718781	0.06415	0.00145	1.1515	0.01662	0.13017	0.00136	0.03989	0.00041	747	15	778	8	789	8	791	8
21NB-1-35	245.36	262.27	0.935524	0.06573	0.00153	1.18059	0.01817	0.13026	0.00138	0.03898	0.0004	798	16	792	8	789	8	773	8
21NB-1-36	143.97	242.27	0.594254	0.06502	0.00317	1.15723	0.05394	0.12907	0.00185	0.03949	0.00046	775	105	781	25	783	11	783	9
21NB-6 (Granodiorite, 27°5′12″N 102°53′45″E)
21NB-6-01	206.67	161.58	1.27906	0.07085	0.00542	1.2703	0.09427	0.13004	0.00275	0.03954	0.00139	953	118	833	42	788	16	784	27
21NB-6-02	188.91	132.72	1.42337	0.06744	0.00701	1.20822	0.1223	0.12993	0.00368	0.03852	0.0016	851	165	804	56	787	21	764	31
21NB-6-03	46.92	69.51	0.675011	0.06703	0.00666	1.19721	0.11585	0.12955	0.00348	0.03859	0.00212	839	158	799	54	785	20	765	41
21NB-6-04	64.08	76.44	0.838305	0.0743	0.00737	1.33661	0.12871	0.13047	0.00367	0.04173	0.00202	1050	150	862	56	791	21	826	39
21NB-6-06	51.98	52.89	0.982794	0.06983	0.00544	1.27765	0.09667	0.13271	0.00287	0.03937	0.00154	923	120	836	43	803	16	780	30
21NB-6-07	75.85	102.36	0.741012	0.06256	0.00504	1.11917	0.08773	0.12974	0.00278	0.03955	0.00172	693	131	763	42	786	16	784	33
21NB-6-08	60.23	81.33	0.740563	0.06702	0.00976	1.21361	0.17244	0.13134	0.00508	0.03781	0.00284	838	236	807	79	796	29	750	55
21NB-6-09	36.85	63.59	0.579494	0.07014	0.00414	1.27882	0.07305	0.13225	0.00223	0.04135	0.00157	932	90	836	33	801	13	819	30
21NB-6-10	53.54	80.33	0.666501	0.07178	0.00682	1.29786	0.11982	0.13114	0.00345	0.04536	0.00245	980	146	845	53	794	20	897	47
21NB-6-11	182.97	192.57	0.950148	0.0626	0.0052	1.12212	0.09081	0.13002	0.00286	0.03723	0.00157	695	136	764	43	788	16	739	31
21NB-6-12	64.48	76.17	0.846528	0.07193	0.00683	1.30349	0.1202	0.13144	0.00348	0.04214	0.00207	984	145	847	53	796	20	834	40
21NB-6-13	75.03	70.42	1.06546	0.06501	0.0063	1.15944	0.10938	0.12936	0.00332	0.03821	0.00166	775	156	782	51	784	19	758	32
21NB-6-14	309.86	422.77	0.732928	0.06731	0.00369	1.20423	0.0637	0.12977	0.00202	0.03794	0.00121	847	84	803	29	787	12	753	24
21NB-6-15	177.42	270.19	0.656649	0.06459	0.00316	1.1604	0.05468	0.13031	0.00182	0.03981	0.00115	761	76	782	26	790	10	789	22
21NB-6-16	116.13	143.82	0.807468	0.06493	0.00589	1.14879	0.10144	0.12833	0.00312	0.03729	0.00181	772	146	777	48	778	18	740	35
21NB-6-17	93.63	76.56	1.22296	0.07362	0.00596	1.3216	0.10383	0.13022	0.00299	0.04249	0.00164	1031	122	855	45	789	17	841	32
21NB-6-18	66.44	76.45	0.869065	0.06372	0.00785	1.12915	0.13585	0.12855	0.00412	0.03734	0.00228	732	204	767	65	780	24	741	44
21NB-6-19	51.9	63.54	0.816808	0.06843	0.00719	1.2226	0.12517	0.12959	0.00368	0.04065	0.00223	882	166	811	57	786	21	805	43
21NB-6-20	268.73	227.81	1.17962	0.06688	0.00567	1.18163	0.09737	0.12816	0.00296	0.03626	0.00146	834	134	792	45	777	17	720	28
21NB-6-21	524.85	352.94	1.48708	0.06662	0.00527	1.19654	0.09193	0.13029	0.00282	0.03634	0.00126	826	125	799	42	790	16	721	25
21NB-6-22	99.68	115.97	0.859533	0.06202	0.00409	1.11136	0.07126	0.12999	0.00228	0.03831	0.00135	675	107	759	34	788	13	760	26
21NB-6-23	128.53	145.7	0.882155	0.072	0.00659	1.29885	0.11551	0.13087	0.00336	0.03725	0.0018	986	140	845	51	793	19	739	35
21NB-6-24	117.92	134.53	0.876533	0.07404	0.00712	1.35726	0.1268	0.13298	0.00361	0.04169	0.00199	1043	145	871	55	805	21	826	39
17NB-4 (K-feldspar granite, 27°7′29″N 101°54′3″E)
17NB-4-01	198.83	333.09	0.596926	0.06625	0.00157	1.21108	0.01923	0.1326	0.0015	0.03958	0.00047	814	16	806	9	803	9	785	9
17NB-4-02	459.21	665.14	0.690396	0.0668	0.0015	1.2134	0.01706	0.13176	0.00146	0.03884	0.00042	832	13	807	8	798	8	770	8
17NB-4-03	122.87	287.72	0.427047	0.0656	0.00197	1.17383	0.02825	0.12979	0.00163	0.03948	0.00076	794	30	788	13	787	9	783	15
17NB-4-04	193.58	369.19	0.524337	0.06762	0.00196	1.20629	0.03194	0.12938	0.00152	0.03941	0.00041	857	62	803	15	784	9	781	8
17NB-4-05	129.53	247.48	0.523396	0.06542	0.00177	1.17575	0.02411	0.13036	0.00155	0.03957	0.00059	788	24	789	11	790	9	784	11
17NB-4-06	320.93	553.18	0.580155	0.06917	0.00215	1.25706	0.03607	0.13181	0.00158	0.04005	0.00042	904	66	827	16	798	9	794	8
17NB-4-07	97.83	148.27	0.65981	0.06619	0.00196	1.20554	0.02844	0.13211	0.00164	0.04118	0.00071	812	29	803	13	800	9	816	14
17NB-4-08	259.97	352.54	0.73742	0.06699	0.00167	1.21351	0.02143	0.1314	0.00151	0.03998	0.00049	837	19	807	10	796	9	792	10
17NB-4-09	254.18	438.49	0.579671	0.06619	0.0015	1.19651	0.01721	0.13112	0.00144	0.03825	0.00042	812	14	799	8	794	8	759	8
17NB-4-10	192.96	364.28	0.529702	0.06561	0.00168	1.18079	0.02195	0.13055	0.00151	0.03921	0.00055	794	21	792	10	791	9	777	11
17NB-4-11	292.71	525.64	0.556864	0.06615	0.00148	1.2073	0.01701	0.13238	0.00145	0.03976	0.00044	811	14	804	8	801	8	788	9
17NB-4-12	373.84	438.29	0.852951	0.06457	0.00147	1.15282	0.01682	0.12952	0.00142	0.03475	0.00037	760	14	779	8	785	8	690	7
17NB-4-13	427.22	777.62	0.549394	0.06886	0.0015	1.24429	0.01633	0.13108	0.00142	0.03892	0.00041	895	12	821	7	794	8	772	8
17NB-4-14	267	466.78	0.572004	0.06668	0.00164	1.21497	0.02093	0.13217	0.0015	0.04076	0.00051	828	18	807	10	800	9	808	10
17NB-4-15	697.84	1006.66	0.693223	0.06641	0.00142	1.20241	0.01483	0.13133	0.00141	0.03884	0.00038	819	12	802	7	795	8	770	7
17NB-4-16	140.91	317.13	0.444329	0.0676	0.00175	1.23494	0.02346	0.13251	0.00154	0.04122	0.00062	856	21	817	11	802	9	816	12
17NB-4-17	145.94	315.27	0.462905	0.06682	0.00214	1.19883	0.03548	0.13012	0.00158	0.03969	0.00042	832	68	800	16	789	9	787	8
17NB-4-18	168.9	356.5	0.473773	0.0682	0.00182	1.21971	0.0244	0.1297	0.00152	0.03949	0.00061	875	23	810	11	786	9	783	12
17NB-4-19	46.05	143.84	0.320147	0.06576	0.0017	1.18956	0.02257	0.1312	0.00151	0.03925	0.00064	799	21	796	10	795	9	778	12
17NB-4-20	110.21	264.61	0.4165	0.06564	0.00166	1.1833	0.02167	0.13075	0.00149	0.04082	0.00057	795	20	793	10	792	8	809	11
17NB-4-21	166.17	280.69	0.592005	0.06462	0.00155	1.16642	0.01921	0.13091	0.00145	0.03874	0.00046	762	17	785	9	793	8	768	9
17NB-4-22	287.59	587.5	0.489515	0.06499	0.00151	1.17906	0.01819	0.13156	0.00144	0.03965	0.00047	774	16	791	8	797	8	786	9
17NB-4-23	91.32	132.27	0.690406	0.06574	0.00202	1.19017	0.02989	0.13128	0.00164	0.0396	0.00076	798	32	796	14	795	9	785	15
17NB-4-24	397.47	385.23	1.03177	0.06857	0.0016	1.24681	0.01939	0.13186	0.00145	0.02231	0.00026	886	16	822	9	798	8	446	5
17NB-4-25	202.94	324.61	0.625181	0.06687	0.00156	1.22113	0.01885	0.13242	0.00145	0.04252	0.00049	834	16	810	9	802	8	842	10
17NB-4-26	160.22	262.14	0.6112	0.06965	0.00239	1.25294	0.04026	0.13048	0.0016	0.03961	0.00042	918	72	825	18	791	9	785	8
17NB-4-27	236.5	300.59	0.786786	0.07117	0.00167	1.28485	0.02024	0.13091	0.00144	0.03497	0.0004	962	16	839	9	793	8	695	8
21NB-4 (Monzogranite, 27°5′56″N 101°54′38″E)
21NB-4-01	217.39	162.13	1.34084	0.06586	0.00672	1.16241	0.11547	0.12808	0.00349	0.03509	0.0014	802	164	783	54	777	20	697	27
21NB-4-02	164.98	495.39	0.333031	0.07012	0.00525	1.24692	0.09059	0.12905	0.00269	0.03211	0.00166	932	115	822	41	782	15	639	33
21NB-4-03	110.03	149.48	0.736085	0.06148	0.00605	1.12132	0.10756	0.13237	0.00338	0.0364	0.00195	656	163	764	51	801	19	723	38
21NB-4-04	55.97	232.77	0.240452	0.06837	0.0027	1.22105	0.04602	0.12961	0.00154	0.03818	0.00131	880	58	810	21	786	9	757	26
21NB-4-05	137.94	419.63	0.328718	0.06734	0.00276	1.20444	0.04721	0.1298	0.00158	0.03698	0.00119	848	61	803	22	787	9	734	23
21NB-4-06	113.36	250.01	0.453422	0.06828	0.00215	1.24291	0.03682	0.13209	0.00133	0.04076	0.00088	877	45	820	17	800	8	808	17
21NB-4-07	77.42	107.65	0.719183	0.06823	0.00319	1.22865	0.0553	0.13069	0.00177	0.03745	0.00101	876	71	814	25	792	10	743	20
21NB-4-08	69.52	210.32	0.330544	0.0655	0.00238	1.17028	0.04044	0.12967	0.00142	0.04164	0.0012	790	54	787	19	786	8	825	23
21NB-4-09	264.97	431.45	0.614138	0.06918	0.00507	1.23586	0.0879	0.12964	0.00265	0.03583	0.00155	904	113	817	40	786	15	712	30
21NB-4-10	100.07	174.03	0.575016	0.06609	0.00214	1.20821	0.03702	0.13268	0.00134	0.03827	0.00085	809	47	804	17	803	8	759	17
21NB-4-11	262.98	497.38	0.528731	0.06843	0.00365	1.22238	0.06294	0.12964	0.00198	0.03842	0.00131	882	81	811	29	786	11	762	25
21NB-4-12	218.26	662.95	0.329225	0.06004	0.00419	1.07643	0.07299	0.1301	0.00239	0.03589	0.00204	605	115	742	36	788	14	713	40
21NB-4-13	163.57	346.01	0.472732	0.07261	0.00597	1.2958	0.10335	0.12951	0.003	0.0374	0.00212	1003	125	844	46	785	17	742	41
21NB-4-14	116.62	304.36	0.383165	0.06493	0.0032	1.1695	0.05549	0.13071	0.00182	0.0496	0.00168	772	76	786	26	792	10	978	32
21NB-4-15	134.13	487.87	0.27493	0.06681	0.00192	1.21207	0.03267	0.13165	0.00124	0.03857	0.00101	832	40	806	15	797	7	765	20
21NB-4-16	23.06	132.54	0.173985	0.06557	0.01117	1.1948	0.19873	0.13224	0.00589	0.04259	0.00792	793	282	798	92	801	34	843	154
21NB-4-17	333.86	889.65	0.375271	0.06786	0.00363	1.21384	0.06259	0.12982	0.00197	0.0384	0.00175	864	82	807	29	787	11	762	34
21NB-4-18	239.15	1765.75	0.135438	0.06858	0.00353	1.2454	0.06184	0.13178	0.00195	0.03929	0.00267	886	78	821	28	798	11	779	52
21NB-4-19	346.4	946.1	0.366135	0.06882	0.00311	1.22909	0.05331	0.12961	0.00172	0.03968	0.00153	893	68	814	24	786	10	787	30
21NB-4-20	170.24	405.14	0.4202	0.06799	0.00351	1.20389	0.05996	0.12851	0.00189	0.03835	0.00141	868	79	802	28	779	11	761	27
21NB-4-21	107.19	98	1.09378	0.0634	0.00605	1.13832	0.10596	0.1303	0.00325	0.03724	0.00171	722	156	772	50	790	19	739	33
21NB-4-22	131.29	187.67	0.699579	0.06521	0.00439	1.15766	0.07566	0.12884	0.00235	0.03713	0.00143	781	107	781	36	781	13	737	28
21NB-4-23	77.21	123.43	0.625537	0.06487	0.00351	1.16379	0.06131	0.13012	0.00157	0.03982	0.00035	770	117	784	29	789	9	789	7
Isotopic ratios and ages were corrected by common lead, following the methods by Andersen (2002).
Reference:
Andersen, T., 2002. Correction of common lead in U–Pb analyses that do not report 204Pb. Chemical Geology 192, 59–79.

## Sheet: Zircon Hf isotopic data
Supplementary Data S5 Zircon Lu-Hf isotopic data of the Neoproterozoic Nanba intrusive complex of the western Yangtze Block, South China
Grain spot	Age (Ma)	176Yb/177Hf	2SE	176Lu/177Hf	2SE	176Hf/177Hf	2SE	(176Hf/177Hf)i	fLu/Hf	εHf(t)	2SE	TDM1(Ma)	TDMC(Ma)
21NB-3 (Cumulate gabbro, 27°5′56″N 101°54′38″E)
21NB-3-1	795	0.0321102	0.000259	0.000994259	6.43e-06	0.282482	1.5e-05	0.282467	-0.970052	6.23491	0.531395	1110.9	1200.66
21NB-3-2	795	0.0190568	0.000356	0.000530206	9.18e-06	0.282483	1.68e-05	0.282475	-0.98403	6.77235	0.595162	1086	1173.3
21NB-3-3	795	0.0616243	0.000138	0.00167541	3.32e-06	0.282466	1.86e-05	0.282441	-0.949536	4.96098	0.658929	1168.14	1265.47
21NB-3-4	795	0.117897	0.00122	0.00330395	3.28e-05	0.282507	2.58e-05	0.282457	-0.900484	4.66772	0.913999	1197.76	1280.36
21NB-3-5	795	0.0504328	0.000692	0.00147949	1.92e-05	0.282551	2.07e-05	0.282528	-0.955437	8.15842	0.733325	1037.75	1102.7
21NB-3-6	795	0.0947704	0.00184	0.00284904	4.98e-05	0.282504	2.27e-05	0.282461	-0.914186	5.05378	0.804177	1176.55	1260.74
21NB-3-7	795	0.0293104	0.000147	0.000825107	3.34e-06	0.282442	1.69e-05	0.28243	-0.975147	5.02177	0.598705	1157.33	1262.38
21NB-3-8	795	0.26368	0.00143	0.00703932	1.59e-05	0.282529	2.63e-05	0.282424	-0.787972	1.52001	0.931712	1393.75	1440
21NB-3-9	795	0.101704	0.000687	0.00296223	1.67e-05	0.282448	2.29e-05	0.282404	-0.910776	2.9465	0.811262	1265.74	1367.79
21NB-3-10	795	0.0328402	0.000739	0.000922441	2.01e-05	0.28244	1.86e-05	0.282427	-0.972216	4.84785	0.658929	1165.14	1271.22
21NB-3-11	795	0.0747659	0.00068	0.00206033	1.59e-05	0.282429	1.88e-05	0.282398	-0.937942	3.23198	0.666015	1242.49	1353.31
21NB-3-12	795	0.0763754	0.000725	0.00218914	2.18e-05	0.28245	1.47e-05	0.282417	-0.934062	3.85016	0.520767	1218.82	1321.91
21NB-3-13	795	0.0705415	0.000598	0.00191297	1.21e-05	0.28254	1.89e-05	0.282511	-0.94238	7.32034	0.669557	1074.72	1145.4
21NB-3-14	795	0.0153637	2.81e-05	0.000497564	7.63e-07	0.282573	1.47e-05	0.282566	-0.985013	10.0059	0.520767	959.06	1008.47
21NB-2 (Hornblende gabbro, 27°5′56″N 101°54′38″E)
21NB-2-1	795	0.0276812	0.000123	0.000751004	2.66e-06	0.282496	1.61e-05	0.282485	-0.977379	6.99909	0.570364	1078.77	1161.76
21NB-2-2	795	0.0232618	0.000391	0.000651867	9.51e-06	0.282498	1.75e-05	0.282488	-0.980365	7.16783	0.61996	1071.39	1153.17
21NB-2-3	795	0.0256937	5.05e-05	0.000706014	1.95e-06	0.282486	1.41e-05	0.282475	-0.978735	6.67829	0.499511	1091.05	1178.09
21NB-2-4	795	0.0289238	0.000131	0.000848905	3.97e-06	0.282497	1.59e-05	0.282484	-0.974431	6.92376	0.563278	1082.48	1165.6
21NB-2-5	795	0.0361118	4.55e-05	0.000976842	1.46e-06	0.282508	1.71e-05	0.282494	-0.970577	7.19923	0.60579	1072.54	1151.57
21NB-2-6	795	0.0303546	0.000106	0.000830404	1.92e-06	0.282513	1.69e-05	0.2825	-0.974988	7.50663	0.598705	1059.32	1135.91
21NB-2-7	795	0.0240237	8.64e-05	0.000723255	2.72e-06	0.282484	1.58e-05	0.282473	-0.978215	6.58564	0.559736	1094.83	1182.81
21NB-2-8	795	0.0418931	0.000334	0.0012554	3.19e-06	0.282361	7.09e-05	0.282342	-0.962187	1.67888	2.51173	1294.64	1432.15
21NB-2-9	795	0.0443973	0.000121	0.0012272	2.27e-06	0.282406	2.5e-05	0.282388	-0.963036	3.30647	0.885658	1229.53	1349.54
21NB-2-10	795	0.0275556	0.000218	0.00074465	4.34e-06	0.282446	1.52e-05	0.282434	-0.977571	5.21679	0.53848	1148.88	1252.46
21NB-2-11	795	0.0220682	0.000204	0.000613082	6.15e-06	0.282449	1.6e-05	0.28244	-0.981534	5.4801	0.566821	1137.33	1239.07
21NB-2-12	795	0.0253817	5.58e-05	0.00070595	1.11e-06	0.282435	1.54e-05	0.282424	-0.978736	4.87871	0.545565	1161.81	1269.66
21NB-2-13	795	0.0287944	0.000115	0.000800949	3.01e-06	0.28244	1.53e-05	0.282428	-0.975875	4.94816	0.542023	1160	1266.12
21NB-2-14	795	0.0363316	0.000203	0.00102348	6.89e-06	0.28242	1.57e-05	0.282404	-0.969172	4.00399	0.556193	1199.56	1314.11
21NB-2-15	795	0.0159023	5.58e-05	0.000455478	1.72e-06	0.28247	1.5e-05	0.282463	-0.986281	6.38031	0.531395	1100.75	1193.26
21NB-5 (Gabbro-diorite, 27°5′12″N 101°53′45″E)
21NB-5-1	794	0.0216175	7.65e-05	0.00062387	1.9e-06	0.282523	2.36e-05	0.282514	-0.981209	8.06878	0.836059	1034.93	1106.45
21NB-5-2	794	0.0226046	0.000146	0.000636562	3.97e-06	0.282448	1.62e-05	0.282438	-0.980826	5.38776	0.573905	1140.31	1242.95
21NB-5-3	794	0.015045	5.86e-05	0.000521274	2.34e-06	0.282361	1.59e-05	0.282353	-0.984299	2.43823	0.563277	1254.51	1392.82
21NB-5-4	794	0.0146953	6.48e-06	0.000418922	7.04e-07	0.282506	1.59e-05	0.282499	-0.987382	7.66911	0.563277	1049.25	1126.81
21NB-5-5	794	0.0144503	0.000277	0.000424043	7.04e-06	0.282425	1.51e-05	0.282418	-0.987228	4.79771	0.534936	1161.39	1272.96
21NB-5-6	794	0.0185253	6.29e-05	0.000521393	1e-06	0.282433	1.77e-05	0.282426	-0.984295	4.99942	0.627044	1154.45	1262.7
21NB-5-7	794	0.0156798	2.5e-05	0.000445986	4.27e-07	0.282452	1.75e-05	0.282445	-0.986567	5.74164	0.619959	1124.76	1224.95
21NB-5-8	794	0.021116	3.44e-05	0.00061516	1.37e-06	0.282422	1.61e-05	0.282413	-0.981471	4.50348	0.570362	1174.78	1287.92
21NB-5-9	794	0.0262546	2.73e-05	0.000707106	9.16e-07	0.282392	1.84e-05	0.282382	-0.978702	3.35408	0.651843	1220.84	1346.32
21NB-5-10	794	0.0191738	0.000217	0.000542251	5.2e-06	0.282391	1.48e-05	0.282383	-0.983667	3.46466	0.524308	1214.66	1340.71
21NB-5-11	794	0.0100816	3.37e-05	0.000292071	6.34e-07	0.282424	1.77e-05	0.28242	-0.991203	4.91957	0.627044	1155.39	1266.77
21NB-5-12	794	0.0328801	6.97e-05	0.000881296	2.93e-06	0.282384	1.62e-05	0.28237	-0.973455	2.85457	0.573905	1242.5	1371.68
21NB-5-13	794	0.0134333	0.000164	0.00045314	4.68e-06	0.28245	1.72e-05	0.282443	-0.986351	5.66676	0.609331	1127.74	1228.76
21NB-5-14	794	0.0201	0.000122	0.000593266	3.5e-06	0.282436	1.41e-05	0.282427	-0.982131	4.99781	0.49951	1155.19	1262.79
21NB-5-15	794	0.0260359	0.000104	0.000804287	2.72e-06	0.282444	1.61e-05	0.282432	-0.975774	5.07222	0.570362	1154.28	1259
17NB-5 (Diorite, 27°7′46″N 101°53′20″E)
17NB-5-1	797	0.0230489	9.53e-05	0.000815854	4.16e-06	0.282425	1.97e-05	0.282413	-0.975426	4.46813	0.697901	1180.76	1410.71
17NB-5-2	797	0.0215904	0.000171	0.000734431	6.17e-06	0.282444	1.81e-05	0.282433	-0.977879	5.20996	0.641219	1150.77	1363.97
17NB-5-3	797	0.0293117	0.000171	0.00102231	6.79e-06	0.282479	1.82e-05	0.282463	-0.969208	6.13011	0.644762	1117.01	1305.95
17NB-5-4	797	0.0261684	0.00095	0.000870551	3.22e-05	0.282424	2.03e-05	0.282411	-0.973779	4.36401	0.719157	1185.43	1417.27
17NB-5-5	797	0.0145904	0.000199	0.000552869	7.38e-06	0.282487	1.63e-05	0.282479	-0.983347	6.94376	0.577451	1081.17	1254.61
17NB-5-6	797	0.0192802	9.32e-05	0.000654991	3.3e-06	0.282455	1.65e-05	0.282446	-0.980271	5.7017	0.584537	1130.72	1332.97
17NB-5-7	797	0.0156586	0.000113	0.000568025	4.51e-06	0.282424	1.89e-05	0.282415	-0.982891	4.66746	0.66956	1170.46	1398.16
17NB-5-8	797	0.00548816	9.86e-05	0.000207106	3.13e-06	0.282473	1.57e-05	0.28247	-0.993762	6.7936	0.556196	1084.44	1264.09
17NB-5-9	797	0.00552423	0.00018	0.000205972	5.78e-06	0.28242	1.44e-05	0.282417	-0.993796	4.92783	0.510141	1156.83	1381.75
17NB-5-10	797	0.0148318	5.43e-05	0.000552446	2.34e-06	0.282459	1.78e-05	0.282451	-0.98336	5.93455	0.630591	1120.7	1318.28
17NB-5-11	797	0.0184068	0.000273	0.000624534	9.9e-06	0.28235	1.71e-05	0.282341	-0.981189	2.00363	0.605793	1275.34	1565.84
17NB-5-12	797	0.0216255	1.99e-05	0.00077316	5.05e-07	0.282413	1.81e-05	0.282401	-0.976712	4.07417	0.641219	1195.83	1435.53
17NB-5-13	797	0.0293472	5.26e-05	0.00100183	1.17e-06	0.282389	1.94e-05	0.282374	-0.969825	2.98118	0.687273	1241.5	1504.33
17NB-5-14	797	0.0105791	6.87e-05	0.000425217	2.53e-06	0.282454	1.52e-05	0.282448	-0.987192	5.91374	0.538482	1120.44	1319.6
17NB-5-15	797	0.0148372	8.56e-06	0.00052149	5.73e-07	0.282488	1.62e-05	0.28248	-0.984292	6.98416	0.573909	1079.35	1252.06
17NB-5-16	797	0.0157363	0.000125	0.000543233	4.93e-06	0.282419	1.7e-05	0.282411	-0.983638	4.54853	0.60225	1174.87	1405.65
17NB-5-17	797	0.0178794	0.00046	0.000665465	1.71e-05	0.282464	1.7e-05	0.282454	-0.979956	6.00942	0.60225	1118.73	1313.56
17NB-5-18	797	0.0309199	0.000181	0.00104753	7.77e-06	0.282449	1.97e-05	0.282433	-0.968448	5.05825	0.697901	1159.74	1373.53
17NB-5-19	797	0.00974887	2.77e-05	0.000384872	1.14e-06	0.282507	1.52e-05	0.282501	-0.988407	7.81292	0.538482	1045.99	1199.74
17NB-5-20	797	0.0131229	7.62e-05	0.000467123	2.28e-06	0.282396	1.92e-05	0.282389	-0.98593	3.78972	0.680188	1203.72	1453.45
17NB-5-21	797	0.0327849	0.000303	0.00116901	1.12e-05	0.282459	1.93e-05	0.282441	-0.964789	5.28001	0.683731	1152.1	1359.55
17NB-1 (Granodiorite, 27°5′28″N 101°55′41″E)
17NB-1-1	796	0.0382827	0.000141	0.00131397	4.31e-06	0.282461	1.4e-05	0.282441	-0.960423	5.16583	0.495969	1157.19	1365.98
17NB-1-2	796	0.0256084	6.75e-05	0.000867162	2.53e-06	0.282403	1.61e-05	0.28239	-0.973881	3.60255	0.570365	1214.57	1464.46
17NB-1-3	796	0.0358457	0.000312	0.00116504	8.29e-06	0.282409	1.47e-05	0.282391	-0.964908	3.48865	0.520768	1222.43	1471.62
17NB-1-4	796	0.0236153	0.000334	0.000856953	9.72e-06	0.282468	1.42e-05	0.282455	-0.974188	5.909	0.503055	1123.47	1319.12
17NB-1-5	796	0.0400533	0.000135	0.00138404	3.81e-06	0.28251	1.37e-05	0.282489	-0.958312	6.84515	0.485342	1090.63	1260.07
17NB-1-6	796	0.0685765	0.00125	0.00231001	4.32e-05	0.282496	1.72e-05	0.282461	-0.930421	5.35678	0.609334	1159.29	1353.94
17NB-1-7	796	0.0274659	0.000252	0.000964835	8.72e-06	0.282485	1.4e-05	0.282471	-0.970939	6.41458	0.495969	1104.39	1287.23
17NB-1-8	796	0.0375148	0.000177	0.00122967	6.11e-06	0.282373	1.6e-05	0.282355	-0.962962	2.16957	0.566822	1275.64	1554.62
17NB-1-9	796	0.0328344	0.00019	0.00105921	7.08e-06	0.282393	1.47e-05	0.282377	-0.968096	3.03049	0.520768	1239.37	1500.46
17NB-1-10	796	0.0289985	7.38e-05	0.000960818	3.54e-06	0.282401	1.74e-05	0.282387	-0.97106	3.42531	0.616419	1222.61	1475.61
17NB-1-11	796	0.0291195	0.000156	0.00101765	4.67e-06	0.282479	1.48e-05	0.282464	-0.969348	6.14248	0.524311	1115.62	1304.4
17NB-1-12	796	0.0279686	7.89e-05	0.000916682	2.28e-06	0.282405	1.59e-05	0.282391	-0.972389	3.61735	0.56328	1214.53	1463.52
17NB-1-13	796	0.0312053	0.00024	0.00102495	7.04e-06	0.282474	1.64e-05	0.282459	-0.969128	5.94698	0.580993	1123.44	1316.73
17NB-1-14	796	0.0132053	0.000143	0.000501512	5.46e-06	0.282394	1.36e-05	0.282387	-0.984894	3.68202	0.481799	1207.44	1459.46
17NB-1-15	796	0.0194621	0.000141	0.000669554	5.77e-06	0.282411	1.62e-05	0.282401	-0.979833	4.10256	0.573907	1192.77	1432.97
17NB-1-16	796	0.0203537	5.38e-05	0.00069998	1.82e-06	0.282444	1.37e-05	0.282434	-0.978916	5.23228	0.485342	1148.71	1361.79
17NB-1-17	796	0.0161273	5.76e-05	0.00054941	1.49e-06	0.282413	1.37e-05	0.282405	-0.983452	4.29725	0.485342	1183.9	1420.71
17NB-1-18	796	0.033302	9.19e-05	0.00110854	3.68e-06	0.282454	1.44e-05	0.282437	-0.96661	5.14275	0.51014	1156.12	1367.43
17NB-1-19	796	0.0148106	7.05e-05	0.000509692	2.5e-06	0.282437	1.28e-05	0.282429	-0.984648	5.18605	0.453458	1148.76	1364.71
17NB-1-20	796	0.0211018	6.47e-05	0.000705265	2.05e-06	0.282433	1.28e-05	0.282422	-0.978757	4.81928	0.453458	1164.99	1387.82
17NB-1-21	796	0.023356	0.000186	0.000769938	4.52e-06	0.282457	1.39e-05	0.282445	-0.976809	5.60803	0.492427	1134.57	1338.1
17NB-1-22	796	0.0321455	0.000127	0.00104423	2.69e-06	0.282489	1.49e-05	0.282473	-0.968547	6.45794	0.527853	1103.33	1284.5
17NB-1-23	796	0.0266988	0.000126	0.000872477	3.79e-06	0.282438	1.78e-05	0.282425	-0.973721	4.84392	0.63059	1165.66	1386.27
17NB-1-24	796	0.038846	0.000258	0.00131081	8.22e-06	0.282483	1.44e-05	0.282463	-0.960518	5.94856	0.51014	1125.89	1316.63
17NB-1-25	796	0.0138382	0.000467	0.000487448	1.52e-05	0.282429	1.29e-05	0.282421	-0.985318	4.90851	0.457	1159.39	1382.2
17NB-1-26	796	0.0315912	0.00014	0.00102914	3.87e-06	0.282452	1.59e-05	0.282436	-0.969002	5.14899	0.56328	1155.11	1367.04
17NB-1-27	796	0.0352318	0.000654	0.00116018	2.32e-05	0.282445	1.72e-05	0.282428	-0.965055	4.77978	0.609334	1171.05	1390.31
17NB-1-28	796	0.0167424	5.46e-05	0.000572628	2.42e-06	0.282412	1.54e-05	0.282403	-0.982752	4.23012	0.545566	1186.76	1424.94
17NB-1-29	796	0.0390044	0.000183	0.00127592	6.38e-06	0.282439	1.62e-05	0.28242	-0.961569	4.43743	0.573907	1185.87	1411.87
17NB-1-30	796	0.0254165	5.36e-05	0.000851255	2.12e-06	0.282409	1.57e-05	0.282397	-0.97436	3.84614	0.556194	1204.79	1449.12
17NB-1-31	796	0.0363298	0.000336	0.00123476	1.17e-05	0.28247	1.43e-05	0.282452	-0.962808	5.58637	0.506597	1139.66	1339.47
17NB-1-32	796	0.0461331	0.000311	0.00149446	1.19e-05	0.282461	2.13e-05	0.282439	-0.954986	5.00636	0.754582	1165.35	1376.03
17NB-1-33	796	0.0100626	9.91e-05	0.000356143	2.47e-06	0.282406	1.11e-05	0.282401	-0.989273	4.25418	0.393233	1183.61	1423.43
17NB-1-34	796	0.0212944	2.64e-05	0.000722294	1.35e-06	0.282432	1.39e-05	0.282421	-0.978244	4.77288	0.492427	1166.98	1390.74
17NB-1-35	796	0.0306538	0.00011	0.00108586	3.54e-06	0.282453	1.48e-05	0.282437	-0.967293	5.14907	0.524311	1155.65	1367.03
17NB-1-36	796	0.0229104	0.00026	0.000861937	8.66e-06	0.282436	1.31e-05	0.282423	-0.974038	4.75944	0.464086	1168.89	1391.59
21NB-6 (Granodiorite, 27°5′12″N 102°53′45″E)
21NB-6-1	790	0.0289418	0.000272	0.000892139	6.97e-06	0.282425	1.76e-05	0.282412	-0.973128	4.24317	0.623496	1184.43	1297.89
21NB-6-2	790	0.0631026	0.000399	0.00183495	1.27e-05	0.282397	1.99e-05	0.28237	-0.944731	2.23443	0.704976	1275.82	1399.89
21NB-6-3	790	0.0238217	0.000161	0.00068865	5.24e-06	0.282444	1.78e-05	0.282433	-0.979258	5.10203	0.630581	1148.58	1254.23
21NB-6-4	790	0.0377211	0.000176	0.00110797	4.91e-06	0.282453	1.8e-05	0.282437	-0.966627	4.99737	0.637666	1156.76	1259.55
21NB-6-5	790	0.0281471	0.000529	0.000806316	1.23e-05	0.282435	1.61e-05	0.282423	-0.975713	4.6771	0.570357	1166.44	1275.83
21NB-6-6	790	0.0199678	5.8e-05	0.00065427	9.64e-07	0.282453	1.69e-05	0.282443	-0.980293	5.46412	0.598698	1134.04	1235.81
21NB-6-7	790	0.0281548	0.000104	0.000857764	2.52e-06	0.282432	1.73e-05	0.282419	-0.974164	4.51669	0.612868	1173.29	1283.99
21NB-6-8	790	0.023521	0.000302	0.000691203	9.59e-06	0.282456	1.85e-05	0.282446	-0.979181	5.5528	0.655379	1130.9	1231.3
21NB-6-9	790	0.0293094	0.000391	0.000829498	1.13e-05	0.282488	1.54e-05	0.282476	-0.975015	6.53737	0.545559	1093.3	1181.19
21NB-6-10	790	0.0362166	0.000402	0.00106154	1.26e-05	0.28247	1.52e-05	0.282454	-0.968026	5.62721	0.538474	1131.31	1227.51
21NB-6-11	790	0.0384074	0.000305	0.00109434	7.95e-06	0.282435	1.71e-05	0.282419	-0.967038	4.35987	0.605783	1181.93	1291.96
21NB-6-12	790	0.0427033	0.00193	0.00120401	5.26e-05	0.282391	1.9e-05	0.282373	-0.963735	2.69283	0.673092	1249.4	1376.64
21NB-6-13	790	0.0361852	0.000328	0.00109026	8.48e-06	0.282454	1.78e-05	0.282438	-0.967161	5.04789	0.630581	1154.58	1256.98
21NB-6-14	790	0.027479	0.000666	0.000847442	1.99e-05	0.28239	1.39e-05	0.282377	-0.974475	3.02904	0.49242	1231.81	1359.57
21NB-6-15	790	0.0383684	0.00102	0.0011502	2.6e-05	0.282391	1.63e-05	0.282374	-0.965356	2.73882	0.577442	1246.91	1374.3
17NB-4 (K-feldspar granite, 27°7′29″N 101°54′3″E)
17NB-4-1	795	0.0497358	9.12e-05	0.00157661	8.98e-07	0.282467	1.25e-05	0.282443	-0.952512	5.09394	0.442829	1161.79	1369.74
17NB-4-2	795	0.0652783	0.000598	0.00204407	1.71e-05	0.282479	1.66e-05	0.282449	-0.938432	5.0276	0.588077	1169.2	1373.91
17NB-4-3	795	0.0507665	8.9e-05	0.00167322	2.35e-06	0.282448	1.61e-05	0.282423	-0.949602	4.32917	0.570364	1193.59	1417.92
17NB-4-4	795	0.0764352	0.000758	0.00250391	2.31e-05	0.282501	1.47e-05	0.282464	-0.924581	5.32358	0.520767	1161.76	1355.26
17NB-4-5	795	0.0581117	0.000277	0.00177487	1.01e-05	0.2825	1.2e-05	0.282473	-0.94654	6.05306	0.425116	1124.97	1309.27
17NB-4-6	795	0.0479717	0.000501	0.00152824	1.28e-05	0.282467	1.26e-05	0.282444	-0.953969	5.13099	0.446372	1159.83	1367.4
17NB-4-7	795	0.0479853	0.000184	0.00166262	3.89e-06	0.282481	1.1e-05	0.282456	-0.949921	5.4882	0.389689	1146.75	1344.88
17NB-4-8	795	0.0686038	0.000612	0.00212262	2.06e-05	0.282407	1.43e-05	0.282375	-0.936066	2.37956	0.506596	1277.99	1540.62
17NB-4-9	795	0.0638004	0.000186	0.00196974	3.27e-06	0.282426	1.39e-05	0.282396	-0.940671	3.22163	0.492426	1241.8	1487.65
17NB-4-10	795	0.0577998	0.00157	0.0019887	5.39e-05	0.282468	1.68e-05	0.282438	-0.940099	4.68945	0.595162	1182.38	1395.22
17NB-4-11	795	0.0646588	0.000444	0.00201834	1.43e-05	0.282471	1.55e-05	0.282441	-0.939207	4.77852	0.549108	1179.07	1389.61
17NB-4-12	795	0.0515256	0.000299	0.00167368	7.7e-06	0.282476	1.26e-05	0.282451	-0.949588	5.29936	0.446372	1154.47	1356.79
17NB-4-13	795	0.0436856	0.000106	0.00137229	4.14e-06	0.282417	1.26e-05	0.282397	-0.958666	3.54961	0.446372	1221.52	1467.01
17NB-4-14	795	0.0534795	5.36e-05	0.00167914	2.43e-06	0.282477	1.29e-05	0.282451	-0.949423	5.32191	0.456999	1153.62	1355.37
17NB-4-15	795	0.0582617	0.000241	0.0018535	8.65e-06	0.282467	1.48e-05	0.282439	-0.944172	4.80428	0.524309	1176.3	1387.99
17NB-4-16	795	0.0312897	0.000126	0.00106979	3.74e-06	0.282476	1.36e-05	0.28246	-0.967777	5.93882	0.481798	1123.3	1316.47
17NB-4-17	795	0.03469	6.23e-05	0.00109802	2.09e-06	0.28245	1.34e-05	0.282434	-0.966927	5.0091	0.474713	1160.47	1375.08
17NB-4-18	795	0.059995	0.000266	0.0018644	9.73e-06	0.282441	1.17e-05	0.282413	-0.943843	3.87165	0.414488	1214.2	1446.73
17NB-4-19	795	0.0582142	0.000357	0.00179132	9.23e-06	0.282432	1.31e-05	0.282405	-0.946045	3.61249	0.464085	1223.84	1463.05
17NB-4-20	795	0.0462101	0.000243	0.0014497	6.36e-06	0.282438	1.3e-05	0.282416	-0.956334	4.20096	0.460542	1196.32	1426
17NB-4-21	795	0.0668328	0.000945	0.00209161	3.05e-05	0.28249	1.49e-05	0.282459	-0.937	5.35632	0.527852	1156.28	1353.2
17NB-4-22	795	0.0679778	0.000368	0.00213313	1.27e-05	0.282442	1.53e-05	0.28241	-0.935749	3.6048	0.542023	1228.18	1463.52
17NB-4-23	795	0.0396852	0.000166	0.00129393	3.75e-06	0.282425	1.4e-05	0.282406	-0.961026	3.9089	0.495968	1206.29	1444.39
17NB-4-24	795	0.0675829	0.000381	0.00208355	1.18e-05	0.282469	1.32e-05	0.282438	-0.937242	4.63861	0.467627	1185.46	1398.42
17NB-4-25	795	0.0220316	5.18e-05	0.000786466	2.31e-06	0.282417	1.25e-05	0.282405	-0.976311	4.1664	0.442829	1190.63	1428.18
17NB-4-26	795	0.0520586	0.000321	0.00178436	1.17e-05	0.282448	1.81e-05	0.282421	-0.946254	4.1973	0.641216	1200.12	1426.22
17NB-4-27	795	0.0520586	0.000321	0.00178436	1.17e-05	0.282448	1.81e-05	0.282421	-0.946254	4.1973	0.641216	1200.12	1426.22
21NB-4 (Monzogranite, 27°5′56″N 101°54′38″E)
21NB-4-1	791	0.0895411	0.000253	0.00242766	9.3e-06	0.282453	2.17e-05	0.282417	-0.926878	3.61365	0.768744	1227.95	1330.67
21NB-4-2	791	0.0343985	0.000643	0.000973749	1.53e-05	0.282441	1.77e-05	0.282427	-0.97067	4.73445	0.62704	1166.71	1273.73
21NB-4-3	791	0.0310226	0.00122	0.000899425	3.31e-05	0.2824	1.43e-05	0.282387	-0.972909	3.36737	0.506592	1219.93	1343.2
21NB-4-4	791	0.0309437	0.000173	0.000909753	5.59e-06	0.282387	1.38e-05	0.282374	-0.972598	2.89241	0.488879	1238.79	1367.32
21NB-4-5	791	0.0403036	0.000486	0.00113789	1.2e-05	0.28241	1.86e-05	0.282393	-0.965726	3.47041	0.658923	1218.57	1337.97
21NB-4-7	791	0.069335	0.00016	0.0017735	5.1e-06	0.28251	2.62e-05	0.282483	-0.946581	6.31148	0.928161	1111.09	1193.5
21NB-4-8	791	0.0269455	0.000103	0.000766256	1.81e-06	0.282439	1.66e-05	0.282427	-0.97692	4.87157	0.588072	1159.25	1266.76
21NB-4-9	791	0.0310506	0.000621	0.000959751	1.68e-05	0.282418	1.83e-05	0.282404	-0.971092	3.93086	0.648296	1198.35	1314.58
21NB-4-10	791	0.0658317	0.00136	0.00185466	3.39e-05	0.282479	1.7e-05	0.282452	-0.944137	5.15611	0.602242	1158.65	1252.29
21NB-4-11	791	0.0266646	0.000553	0.000770468	1.42e-05	0.282444	1.38e-05	0.282433	-0.976793	5.06552	0.488879	1151.65	1256.9
21NB-4-12	791	0.070627	0.000597	0.00185207	1.62e-05	0.282369	1.67e-05	0.282341	-0.944215	1.24426	0.591614	1316.92	1450.92
21NB-4-13	791	0.0622492	0.0003	0.00180496	6.74e-06	0.28244	1.59e-05	0.282413	-0.945634	3.8056	0.563273	1212.78	1320.93
21NB-4-14	791	0.0428572	0.000357	0.00136372	9.17e-06	0.282466	1.18e-05	0.282446	-0.958924	5.19862	0.418027	1152.09	1250.13
21NB-4-15	791	0.0566403	0.00121	0.00161845	3.1e-05	0.282523	1.73e-05	0.282498	-0.951252	6.93537	0.61287	1084.59	1161.74

## Sheet: Whole-rock geochemistry
Supplementary Data S6 The whole-rock major (wt.%) and trace (ppm) elements for the Neoproterozoic Nanba intrusive complex of the western Yangtze Block, South China
Sample	21NB-3-1	21NB-3-2	21NB-3-3	21NB-3-4	21NB-2-1	21NB-2-2	21NB-2-2R	21NB-5-1	21NB-5-2	21NB-5-3	21NB-5-4	21NB-5-5	21NB-5-6	21NB-7-1	21NB-7-2	17NB-5-1	17NB-5-2	17NB-6-1	17NB-6-2	17NB-6-2R	17NB-6-3	17NB-1-1	17NB-1-2	17NB-1-3	17NB-1-4	21NB-1-1	21NB-1-2	21NB-1-3	21NB-1-4	21NB-6-1	21NB-6-2	21NB-6-2R	17NB-4-2	17NB-4-2R	17NB-4-3	17NB-4-4	21NB-4-1	21NB-4-2
Location	27°5′56″N 101°54′38″E				27°5′56″N 101°54′38″E			27°5′12″N 102°53′45″E						27°9′51″N 101°52′57″E		27°7′46″N 101°53′20″E		27°7′44″N 101°49′27″E				27°5′28″N 101°55′41″E				27°5′40″N 101°55′24″E				27°5′12″N 102°53′45″E			27°7′29″N 101°54′3″E				27°5′56″N 101°54′38″E
Lithology	Cumulate gabbro				Hornblende gabbro			Gabbro-diorite						Diorite								Granodiorite											K-feldspar granite				Monzogranite
SiO2	48.64	49.87	49.17	49.46	50.82	49.9	49.99	52.7	58.65	51.76	51.9	55.89	55.47	56.39	56.83	56.26	56.18	59.48	59.38	59.38	58.87	65.44	66.46	66.29	66.46	67.14	67.1	65.47	66.9	66.1	69.76	69.7	69.68	69.55	70.59	70.91	76.15	75.82
TiO2	0.82	0.85	0.84	0.84	0.77	0.8	0.8	0.9	0.78	1.01	0.99	0.58	0.58	0.8	0.78	0.57	0.61	0.68	0.55	0.55	0.66	0.43	0.45	0.4	0.42	0.37	0.4	0.4	0.41	0.54	0.41	0.41	0.36	0.35	0.28	0.29	0.17	0.17
Al2O3	20.88	21.51	21.05	21.31	17.86	19.3	19.35	17.85	16.76	18.62	18.52	18.7	18.9	16.76	17.15	19.09	18.98	16.32	16.09	16.16	16.58	16.93	16.27	16.52	16.68	16.25	16.36	16.91	16.2	16.49	15.2	15.23	14.87	14.93	14.59	14.28	12.73	13.17
Fe2O3T	8.3	8.47	8.27	8.52	9.81	9.25	9.24	8.33	6.54	9.12	9.01	6.57	6.76	7.63	7.42	6.34	6.45	6.34	5.87	5.87	6.1	4.16	4.27	4.51	4.08	3.64	3.52	3.94	3.68	3.45	2.6	2.6	3.19	3.17	2.57	2.66	1.34	1.42
MnO	0.14	0.15	0.15	0.15	0.16	0.16	0.16	0.16	0.11	0.16	0.17	0.12	0.11	0.13	0.12	0.12	0.12	0.11	0.1	0.1	0.1	0.08	0.08	0.09	0.08	0.07	0.07	0.08	0.07	0.04	0.03	0.03	0.06	0.06	0.04	0.04	0.02	0.02
MgO	3.06	3.33	3.14	3.48	5.62	5.14	5.15	4.93	4	4.37	4.35	3.59	3.35	4.44	4.23	3.38	3.48	3.39	2.87	2.88	3.2	1.48	1.43	1.53	1.41	1.31	1.37	1.51	1.43	1.78	1.21	1.2	0.6	0.6	0.47	0.54	0.6	0.61
CaO	9.26	8.96	10.18	8.26	9.21	9.22	9.23	7.8	5.62	6.58	6.52	6.08	7.36	6.38	6.94	5.78	5.94	4.91	5.53	5.57	4.98	4.12	3.85	3.86	3.91	4.17	3.87	4.69	4.06	3.67	3.49	3.48	1.95	1.94	1.72	1.5	1.75	1.61
Na2O	4.37	4.27	3.92	4.26	3.28	3.58	3.6	3.45	3.43	4.4	4.33	4.16	3.93	3.27	3.36	4.11	3.88	3.89	3.98	3.91	3.78	4.63	4.38	4.47	4.55	3.95	3.97	4.12	3.85	4.09	3.89	3.92	4.71	4.69	4.11	4.01	5.48	5.31
K2O	0.64	0.55	0.59	0.93	0.47	0.51	0.51	1.37	1.46	1.33	1.26	1.59	1.22	1.78	1.38	1.6	1.54	2.13	2.65	2.64	2.74	0.97	1.02	1.1	1.04	1.91	1.9	1.51	1.96	1.42	1.27	1.27	3.16	3.19	4.42	4.49	0.47	0.74
P2O5	0.33	0.34	0.33	0.34	0.16	0.16	0.16	0.21	0.19	0.29	0.29	0.21	0.24	0.19	0.19	0.21	0.21	0.17	0.17	0.17	0.16	0.13	0.13	0.15	0.13	0.14	0.14	0.16	0.14	0.16	0.12	0.12	0.08	0.08	0.06	0.07	0.03	0.03
LOI	3.27	1.38	2.37	2.13	1.54	1.75	1.73	2.11	2.13	2.61	2.57	2.62	1.76	2.02	1.43	2.56	2.62	2.48	2.37	2.38	2.38	1.3	1.18	1.05	1.05	0.83	1.15	1.01	1	1.86	1.57	1.57	1.2	1.2	1.11	1.12	0.96	1.12
TOTAL	99.71	99.68	100.01	99.68	99.7	99.77	99.92	99.81	99.67	100.25	99.91	100.11	99.68	99.79	99.83	100.02	100.01	99.9	99.56	99.61	99.55	99.67	99.52	99.97	99.81	99.78	99.85	99.8	99.7	99.6	99.55	99.53	99.86	99.76	99.96	99.91	99.7	100.02
Li	21.0021	2.07064	3.74131	11.4345	8.18714	8.97347	9.01235	9.54557	11.353	8.10125	8.22245	8.94286	6.28399	11.4784	9.54652	9.21536	9.71283	6.89955	7.36417	7.58524	6.55311	12.4329	11.8617	12.095	11.1711	15.6433	15.7286	17.5442	16.3159	5.11129	3.78506	3.7626	4.07408	3.97887	2.8979	3.17954	3.80001	3.72492
Be	1.00851	1.04033	0.959698	1.04943	1.05327	1.17106	1.17975	1.15081	1.59132	1.08756	1.10833	1.02077	0.987214	1.18334	1.19128	1.02217	1.02075	1.04535	1.06418	1.08715	1.0547	2.0733	2.02841	2.01671	2.03226	1.59446	1.5635	1.68749	1.49027	1.30113	1.13861	1.14983	1.59794	1.5964	1.36671	1.28086	0.918608	1.224
Sc	13.221	11.4254	11.3665	13.9199	25.3972	23.8292	24.0672	22.2903	17.4288	22.585	22.6599	13.5715	13.7168	21.067	19.1186	11.79	10.798	17.4657	16.6571	16.8728	16.5272	14.7866	13.3118	20.2672	13.0167	4.9626	4.09151	6.65173	4.59723	4.43529	2.94783	2.93056	6.91418	7.00378	4.61591	6.13624	3.26364	3.10801
V	109.846	111.036	111.367	119.756	217.701	215.697	216.615	179.361	134.775	155.33	156.223	109.952	115.758	158.933	151.675	107.183	109.224	115.97	108.076	108.769	112.454	51.9073	55.1845	56.4608	50.2484	48.1985	47.8826	53.4398	49.5229	77.1647	53.459	53.3071	22.0543	23.2444	19.8825	19.588	17.9283	17.2387
Cr	9.58029	9.10131	9.35234	11.0569	38.9966	23.4335	23.9256	77.5948	60.5084	33.7321	33.6944	33.3698	37.4691	71.503	71.9592	34.4355	35.7375	45.7445	37.8899	38.9712	43.0333	6.00733	6.31728	6.41761	5.96593	8.21371	8.51705	10.2376	8.99794	17.8849	11.4196	11.4071	4.81685	4.67605	4.63723	4.12365	2.71166	2.6467
Co	26.6452	39.5178	28.0029	48.7973	54.9375	52.7147	52.8925	54.8219	49.8889	57.718	58.1709	69.1848	106.836	48.0921	54.2577	80.4056	85.9149	82.9484	72.8205	74.3565	73.2898	133.146	144.916	127.261	146.145	76.7361	82.1218	76.1434	69.4219	65.0674	87.6888	87.4826	165.659	164.711	184.745	169.773	100.954	67.7916
Ni	11.7722	12.0346	12.1575	14.2203	34.012	24.3473	24.5376	32.4401	26.0104	22.8394	23.0951	18.3532	16.5104	33.9775	33.0071	17.7915	18.6357	25.0651	18.1559	18.5391	19.8923	3.49009	3.60359	3.58244	3.55914	8.10913	7.51081	8.88568	7.41926	16.6251	14.3816	15.2591	1.78454	1.76134	1.98013	1.72267	2.98126	3.13611
Cu	59.6929	81.345	67.6427	60.1951	42.6392	47.4021	47.86	27.3303	15.0822	61.6253	61.8784	16.5137	16.0494	25.5408	24.5399	13.9474	16.6756	25.3048	16.3822	16.4777	23.2624	7.76737	11.3408	24.6412	7.90885	12.3243	15.6417	27.2717	7.36341	23.4065	15.1922	15.3878	5.83172	5.88869	2.60815	3.70867	1.36892	1.10976
Zn	80.484	84.1566	80.3525	75.5217	85.4903	92.1228	91.9845	93.7571	75.2349	105.966	105.681	77.1037	71.4738	74.6872	70.7196	73.9934	76.9063	115.527	84.3774	85.6573	139.206	64.1603	64.3594	66.0499	62.1611	55.1804	56.8311	59.5624	58.4858	49.6142	36.503	36.593	38.6973	38.7844	27.8307	31.2712	16.0495	16.1412
Ga	21.8112	21.1169	20.8854	21.3857	18.5755	21.2583	21.619	18.6162	17.9446	19.9229	20.053	18.8531	19.7971	17.8036	18.0399	18.9698	19.4056	16.4275	15.8938	16.086	16.383	18.8457	18.4152	18.4433	18.422	16.981	16.6606	17.8625	16.5156	15.574	14.5487	14.5385	19.2539	19.2958	18.2583	17.4597	9.62957	11.3366
Ge	1.08245	1.09321	1.09766	1.08326	1.27806	1.2817	1.30671	1.2219	1.14841	1.20004	1.23152	1.12002	1.20978	1.24799	1.18933	1.04714	1.05276	1.10282	1.23845	1.25135	1.12304	1.15323	1.18968	1.21028	1.16196	1.06052	1.03107	1.18953	1.05077	0.756813	0.722319	0.72721	1.4517	1.473	1.4277	1.36284	0.495611	0.669176
Rb	10.1457	9.35569	12.092	17.2525	7.33017	7.52036	7.85882	26.5149	32.6498	32.8179	33.1779	38.4542	25.9131	40.6379	28.9693	38.438	36.778	53.2269	55.4845	55.9797	63.4737	32.0214	33.5616	35.0568	35.0894	33.5241	32.0809	28.5715	30.9761	30.6835	28.6301	28.5951	53.1758	52.8938	77.0793	74.7607	9.79615	15.7504
Sr	743.008	858.661	859.528	801.828	587.265	697.365	706.525	508.53	444.327	719.249	728.671	946.663	900.367	563.407	500.833	943.631	942.093	345.886	445.429	450.108	368.868	403.295	385.683	386.368	394.92	564.587	565.325	575.211	555.066	423.758	385.841	383.684	248.4	247.883	226.387	207.273	157.582	224.218
Y	17.6512	17.3416	17.3297	16.7444	15.7324	16.6691	16.9581	15.6668	18.8137	28.509	28.841	11.0114	12.4164	19.3903	16.0809	9.27625	8.88045	21.2687	20.8068	21.1941	20.6606	27.9939	36.0513	32.3572	29.0308	9.0623	7.42306	11.2646	8.04922	5.51123	4.05991	4.04585	26.4218	26.5497	17.4046	20.9829	6.34873	6.78834
Zr	154.973	101.746	107.361	106.043	46.5923	41.2276	41.9139	47.6914	93.0853	99.5302	103.36	87.9483	100.338	82.0288	107.52	102.004	80.6051	117.55	125.365	121.06	110.14	180.696	180.417	142.625	179.941	106.496	100.579	100.594	109.868	227.026	182.113	173.449	306.998	324.071	292.696	270.96	104.727	93.2708
Nb	2.79673	2.85915	2.78054	2.68788	2.68943	2.8607	2.90566	3.65622	5.97782	5.76228	5.73588	5.62558	4.48296	4.56832	4.07909	5.50146	5.88052	6.05818	4.88931	4.94256	5.62136	6.66728	7.77552	6.64778	6.63324	4.46861	4.38764	4.54017	4.48147	3.0335	2.45087	2.43088	10.6698	11.0094	7.02248	8.68516	3.34903	3.21197
Cs	0.284858	0.26864	0.322352	0.413119	0.252587	0.317253	0.328004	0.407477	0.71971	1.12756	1.14051	0.959213	0.57754	1.09792	0.930554	0.999337	1.00804	0.494084	0.443107	0.448269	0.540569	0.624713	0.666294	0.699591	0.68448	0.740307	0.487016	0.62822	0.572663	0.394796	0.292704	0.296274	0.354981	0.356431	0.288548	0.257609	0.32249	0.480646
Ba	190.195	173.359	190.123	291.586	225.34	230.256	233.432	609.445	667.134	623.058	630.282	666.567	324.057	615.013	473.767	534.5	545.229	859.955	1081.43	1096.61	1103.43	469.889	481.263	497.022	485.372	1037.04	1016	651.795	1129.1	566.121	506.862	502.851	1018.37	1013.78	1447.31	1466.71	149.931	292.647
La	9.02476	8.3911	7.67619	9.27634	11.0153	11.922	12.22	14.359	18.2161	19.8347	20.3274	13.5795	27.1546	16.0569	14.9886	12.83	13.2132	27.1948	22.0556	22.8956	21.3192	29.1381	35.8934	34.237	26.576	19.8289	17.1791	15.7715	16.5202	15.385	12.869	12.6146	19.0166	18.9421	21.0573	21.7177	34.0743	40.6906
Ce	21.1114	19.679	20.2296	22.644	25.5747	29.2191	30.0081	33.7839	42.7902	48.3947	49.8468	30.6768	48.8747	38.29	34.2722	28.0451	28.5615	53.8877	45.1446	46.5761	44.4831	61.574	72.3958	72.3555	59.1868	43.1992	37.1065	35.7424	36.1349	28.5736	22.5432	22.2143	38.7962	38.7878	37.5737	40.1929	66.1176	78.7276
Pr	3.18212	3.08289	3.01085	3.11895	3.15829	3.5957	3.65965	3.87283	4.96466	6.83331	6.96318	3.73681	5.07888	4.45403	3.90075	3.3578	3.357	6.13074	5.33892	5.47058	5.30618	7.44951	8.55684	8.74943	7.4157	4.45003	3.84177	3.90681	3.7802	2.67778	2.12286	2.09743	5.10788	5.12586	4.22931	4.76849	6.77192	8.11685
Nd	15.7351	15.3782	15.2212	15.1367	14.2697	16.1725	16.5112	16.4788	20.5213	31.2346	31.6925	14.7711	18.4059	19.2263	16.4702	13.131	12.9111	24.0988	21.905	22.2775	21.7757	29.1676	32.4986	33.2203	29.798	16.7654	14.3804	15.4749	14.343	9.56205	7.49934	7.38265	20.698	20.8505	15.9268	18.6997	25.0605	30.0715
Sm	3.63544	3.56209	3.53549	3.51861	3.12756	3.52013	3.55458	3.32651	3.94992	6.50322	6.6152	2.82698	3.16644	3.91843	3.339	2.47652	2.40075	4.56815	4.3159	4.42525	4.29143	5.51866	6.45826	6.38014	5.73297	2.6427	2.24161	2.74068	2.33177	1.42042	1.10105	1.07358	4.18523	4.23065	2.97284	3.67076	4.0452	4.89956
Eu	1.23873	1.22313	1.21771	1.23505	1.03006	1.17212	1.18398	1.17014	1.03679	1.73822	1.75446	1.08002	1.08018	1.2223	1.13015	0.992826	0.988983	1.30663	1.18251	1.19586	1.24115	1.12206	1.20575	1.17042	1.12429	0.817599	0.76897	0.820823	0.790004	0.746915	0.680952	0.673817	1.81556	1.82574	1.43763	1.52415	0.880573	1.02099
Gd	3.33617	3.27577	3.22322	3.21467	2.93168	3.1779	3.23531	3.04943	3.48737	5.70225	5.79797	2.44817	2.78157	3.59188	3.02564	2.16225	2.09283	4.17809	3.99212	4.07355	3.97601	4.92477	5.94717	5.84349	5.0621	2.12797	1.82883	2.29838	1.89282	1.23867	0.927021	0.938686	3.95065	3.99299	2.88157	3.55532	2.92473	3.51515
Tb	0.513027	0.50954	0.503516	0.496895	0.459431	0.493851	0.493842	0.457783	0.528342	0.856056	0.870896	0.343048	0.378755	0.548813	0.458702	0.29949	0.286486	0.616461	0.59383	0.603129	0.596631	0.770392	0.977735	0.906947	0.799359	0.283789	0.239067	0.328563	0.251737	0.163532	0.12012	0.117954	0.622599	0.628415	0.419978	0.530085	0.314114	0.371783
Dy	3.0691	3.03189	3.00187	2.98695	2.80451	2.97788	3.0077	2.75438	3.18985	5.13387	5.17986	1.96756	2.17444	3.33056	2.78303	1.72807	1.63389	3.73318	3.58509	3.66176	3.57271	4.75789	6.18102	5.60097	4.97586	1.57553	1.31129	1.9001	1.41366	0.945564	0.681673	0.67954	3.94423	3.97739	2.60133	3.24123	1.40624	1.61855
Ho	0.646882	0.629606	0.626747	0.61812	0.589606	0.623827	0.629008	0.570324	0.673923	1.02149	1.0373	0.377214	0.427118	0.702069	0.588632	0.330503	0.31591	0.753818	0.730148	0.740639	0.722339	0.982427	1.28271	1.15314	1.03034	0.319921	0.260581	0.389072	0.284418	0.199493	0.143822	0.144991	0.848193	0.861406	0.55404	0.68624	0.233572	0.256449
Er	1.78967	1.7446	1.73949	1.70686	1.65472	1.73722	1.74337	1.60339	1.92328	2.96906	2.97128	1.08658	1.22937	1.97615	1.65555	0.946833	0.901701	2.19223	2.12371	2.15758	2.11559	2.92506	3.82196	3.39749	3.07749	0.889249	0.730296	1.11578	0.800226	0.585379	0.426009	0.426048	2.72326	2.76566	1.79211	2.15667	0.624922	0.640373
Tm	0.275668	0.268288	0.269611	0.262443	0.254499	0.267661	0.269381	0.244745	0.301379	0.439013	0.446542	0.163123	0.185274	0.3094	0.258823	0.142516	0.135752	0.32962	0.315368	0.31937	0.312047	0.437967	0.577549	0.497175	0.459835	0.141678	0.113649	0.181604	0.124573	0.0942125	0.0682106	0.0687555	0.450055	0.454603	0.302077	0.355634	0.0986696	0.0948897
Yb	1.75297	1.6667	1.68631	1.64631	1.60522	1.64483	1.65234	1.52948	1.89265	2.84326	2.87074	1.10698	1.29394	1.96241	1.65938	0.96347	0.921841	2.16108	2.06943	2.07839	2.04326	2.7391	3.60849	3.07974	2.91229	0.881034	0.708361	1.15894	0.771464	0.632332	0.467037	0.465831	3.10346	3.15931	2.1478	2.53532	0.663296	0.611441
Lu	0.321703	0.298469	0.301232	0.302586	0.28803	0.293705	0.294489	0.271705	0.334334	0.423396	0.429177	0.18181	0.211762	0.357056	0.304647	0.157755	0.149515	0.33404	0.31744	0.320012	0.314026	0.394098	0.493703	0.442897	0.414686	0.160166	0.130144	0.220109	0.143385	0.130355	0.0949349	0.0947368	0.492425	0.504526	0.361426	0.41609	0.138521	0.125899
Hf	3.21398	2.19914	2.32382	2.26342	1.31592	1.24311	1.25815	1.34975	2.36129	2.506	2.59109	2.16768	2.41038	2.16061	2.65748	2.3054	1.86718	2.96803	3.15217	3.04345	2.78846	4.43649	4.44942	3.54509	4.41911	2.71454	2.53025	2.5901	2.87104	5.21437	4.25351	4.02971	8.67818	9.1685	8.23197	7.70547	2.88336	2.55848
Ta	0.171818	0.201114	0.180504	0.167043	0.245248	0.209809	0.210394	0.276548	0.353473	0.335608	0.332581	0.250343	0.303649	0.374573	0.385063	0.256941	0.275684	0.44044	0.365112	0.377691	0.390717	0.630849	0.90529	0.563205	0.680993	0.539421	0.477589	0.553906	0.438125	0.302999	0.413503	0.41448	0.578085	0.580528	0.493049	0.576141	0.644529	0.640936
Pb	5.91957	5.79003	5.14514	5.5759	4.72666	5.37377	5.46485	9.06318	8.72095	10.1435	10.3361	14.3737	10.3314	8.22018	8.58982	9.67212	12.2342	41.3589	16.3848	16.2779	33.7863	10.2356	10.02	10.3588	10.1839	12.0584	11.4663	11.1498	11.6304	9.73789	9.26167	9.33762	11.8098	11.8629	12.1687	12.7872	3.42738	3.5274
Th	0.468198	0.37495	0.410476	0.456699	0.975546	0.745085	0.804134	1.32335	0.816693	1.15185	1.20142	0.169187	2.06569	3.49046	3.18111	0.223045	0.173031	5.92606	4.55891	4.76492	4.18475	5.39416	6.28055	6.38844	5.20924	3.48638	2.89381	2.74062	2.75829	1.17373	0.757628	0.728187	4.89194	5.00755	4.74217	5.74185	9.93751	12.2677
U	0.205571	0.197288	0.216392	0.173898	0.222542	0.186635	0.187789	0.287494	0.20954	0.282692	0.3	0.29147	0.380063	0.744064	0.721054	0.272392	0.283156	0.803853	0.655868	0.66349	0.690703	1.90367	1.2181	2.01209	1.84206	0.325592	0.266446	0.546358	0.270494	0.348085	0.250009	0.249899	1.36869	1.41239	1.03363	0.984849	0.890441	0.924333
A/CNK	0.844751	0.899624	0.822406	0.925228	0.788544	0.831742	0.832065	0.836474	0.960976	0.902089	0.910478	0.953181	0.892905	0.886513	0.873273	1.00465	1.00694	0.925608	0.826409	0.832281	0.90908	1.04784	1.06277	1.06157	1.0611	1.00639	1.04714	0.998291	1.02296	1.10392	1.07656	1.07631	1.01062	1.01598	0.994383	1.00679	1.00195	1.0567
Mg#	46.2133	47.8145	46.9456	48.7677	57.1754	56.4271	56.5014	57.9704	58.7694	52.7566	52.9447	56.0138	53.5943	57.5579	57.0552	55.4058	55.701	55.4788	53.2589	53.3455	55.0068	45.3289	43.8351	44.1532	44.6104	45.6145	47.5627	47.1783	47.5231	54.595	52.0287	51.8215	30.4753	30.6088	29.8836	32.1164	51.0645	50.0282
REE	65.6328	62.7413	62.243	66.1644	68.7633	76.8185	78.4629	83.4724	103.81	133.927	136.803	74.3457	112.443	95.9464	84.8354	67.5641	67.8705	131.485	113.67	116.795	112.069	151.902	179.899	177.035	148.566	94.0832	80.8405	82.0496	79.5824	62.3553	49.7452	48.9929	105.754	106.107	94.2579	104.05	143.354	170.762
Eu/Eu*	1.08742	1.09468	1.1028	1.12267	1.03998	1.07139	1.06737	1.12321	0.854028	0.87265	0.866081	1.25509	1.11273	0.996054	1.08703	1.31167	1.34888	0.914359	0.870945	0.861088	0.918594	0.658005	0.594798	0.586021	0.638041	1.05404	1.16109	0.999847	1.14962	1.7215	2.06059	2.05205	1.36503	1.35803	1.50165	1.28983	0.782664	0.752131
(La/Yb)N	3.69285	3.6113	3.26519	4.04172	4.92225	5.19911	5.30483	6.73414	6.90375	5.00392	5.07911	8.79919	15.0533	5.86912	6.47913	9.5519	10.2814	9.02639	7.64485	7.90181	7.48424	7.63052	7.13492	7.97411	6.54568	16.1438	17.3959	9.76136	15.3603	17.4524	19.7648	19.4243	4.3953	4.30066	7.0325	6.14442	36.8485	47.7353
(Dy/Yb)N	1.17179	1.21751	1.19143	1.21432	1.16933	1.21172	1.21829	1.2053	1.12802	1.20849	1.20764	1.18961	1.12473	1.13591	1.12251	1.20044	1.18627	1.15617	1.15949	1.17917	1.17028	1.16258	1.14644	1.21721	1.14353	1.19688	1.23896	1.09731	1.22643	1.00083	0.976877	0.976341	0.850612	0.842598	0.810619	0.85564	1.41895	1.77168
